# Supplementary material for: Gene expression profiling analysis of CRTC1-MAML2 fusion oncogene-induced transcriptional program in human mucoepidermoid carcinoma cells
Source: PubMed Central journal article supplement (PMC4624166; doi:10.1186/s12885-015-1827-3), 2015-10-26
Supplement: 12885_2015_1827_MOESM1_ESM.pdf [file 12885_2015_1827_MOESM1_ESM.pdf]

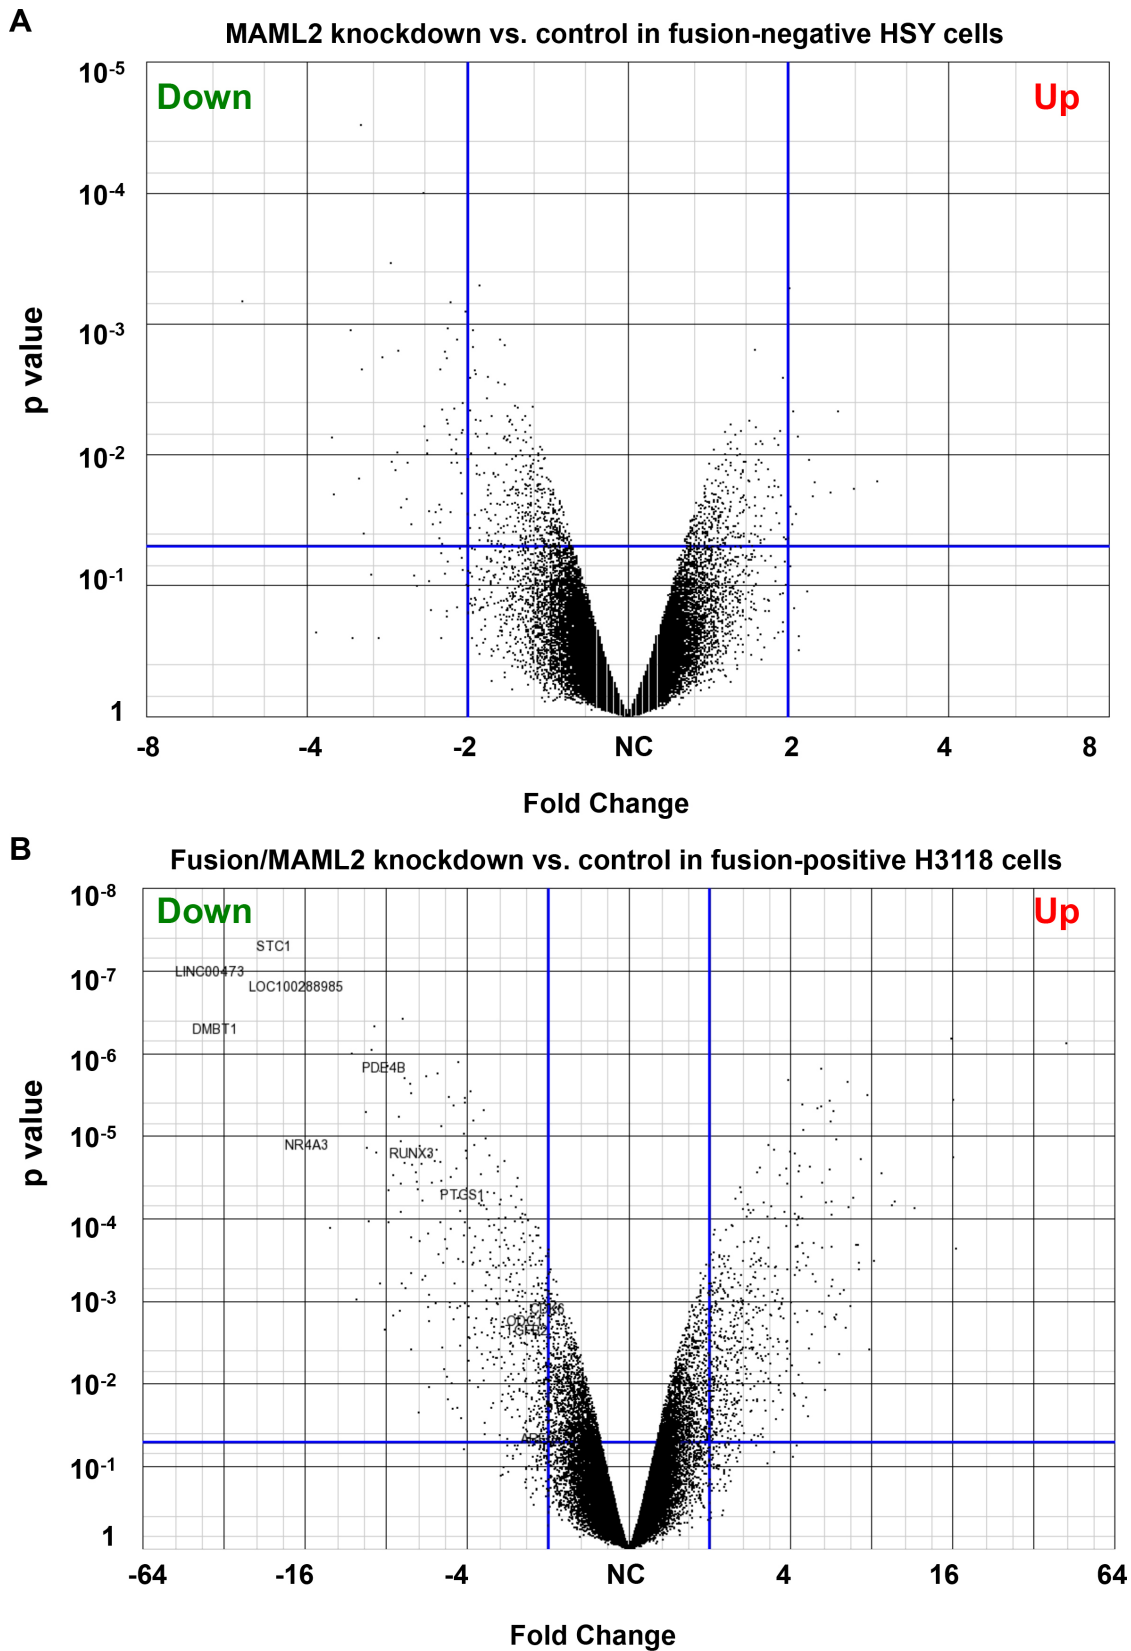

**Figure S1. Volcano plots showed differential expression between MAML2 TAD shRNA and control groups in fusion-negative HSY cells (A) and in fusion-positive H3118 cells (B).** The vertical lines corresponded to 2.0-fold up and down, respectively, and the horizontal line represented a p-value of 0.05. NC denoted no change. “Down” or “Up” referred to significantly down-regulated or up-regulated genes. Several fusion-regulated genes in H3118 cells were indicated.

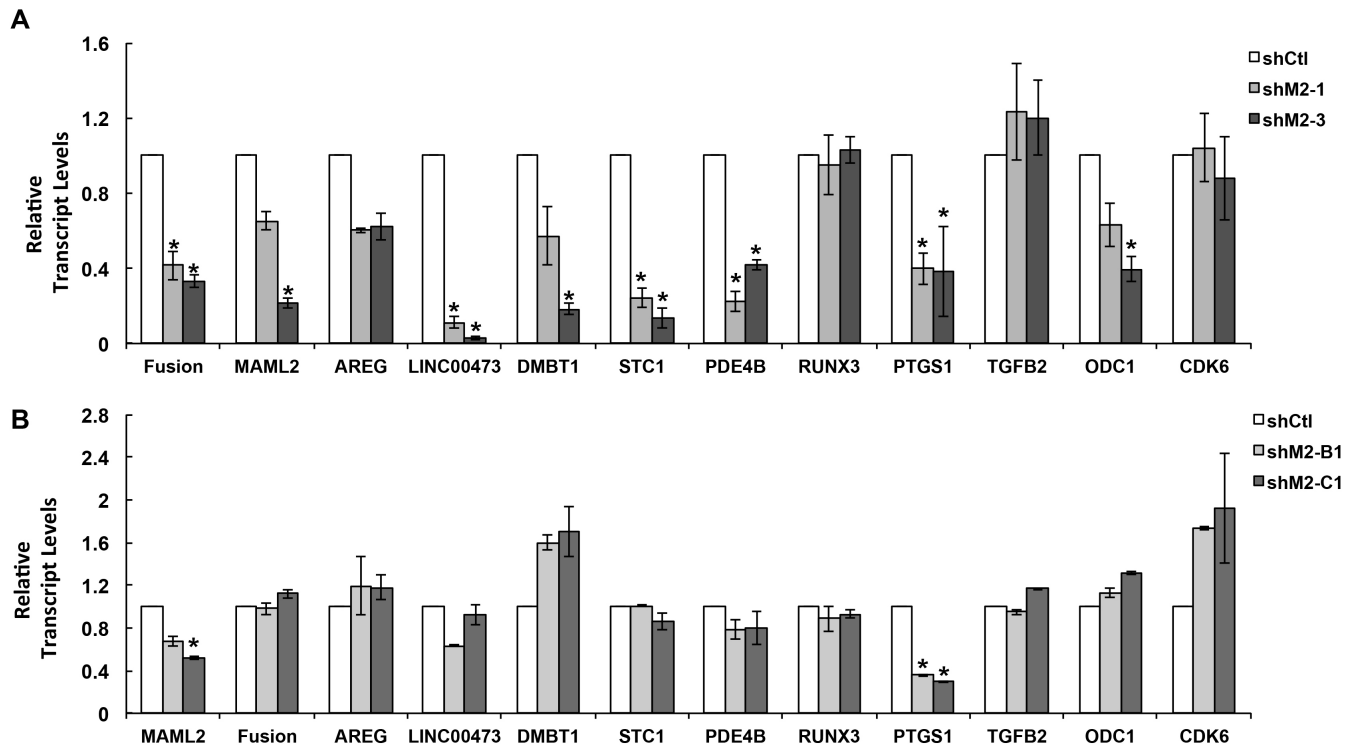

**Figure S2. Validation of a subset of CRTC1-MAML2 fusion-regulated genes in human MEC H292 cell line.** Real-time RT-PCR assays were performed in H292 cells that were depleted of fusion/MAML2 or MAML2 only for a subset of CRTC1-MAML2 fusion candidate genes identified in human MEC H3118 cells.

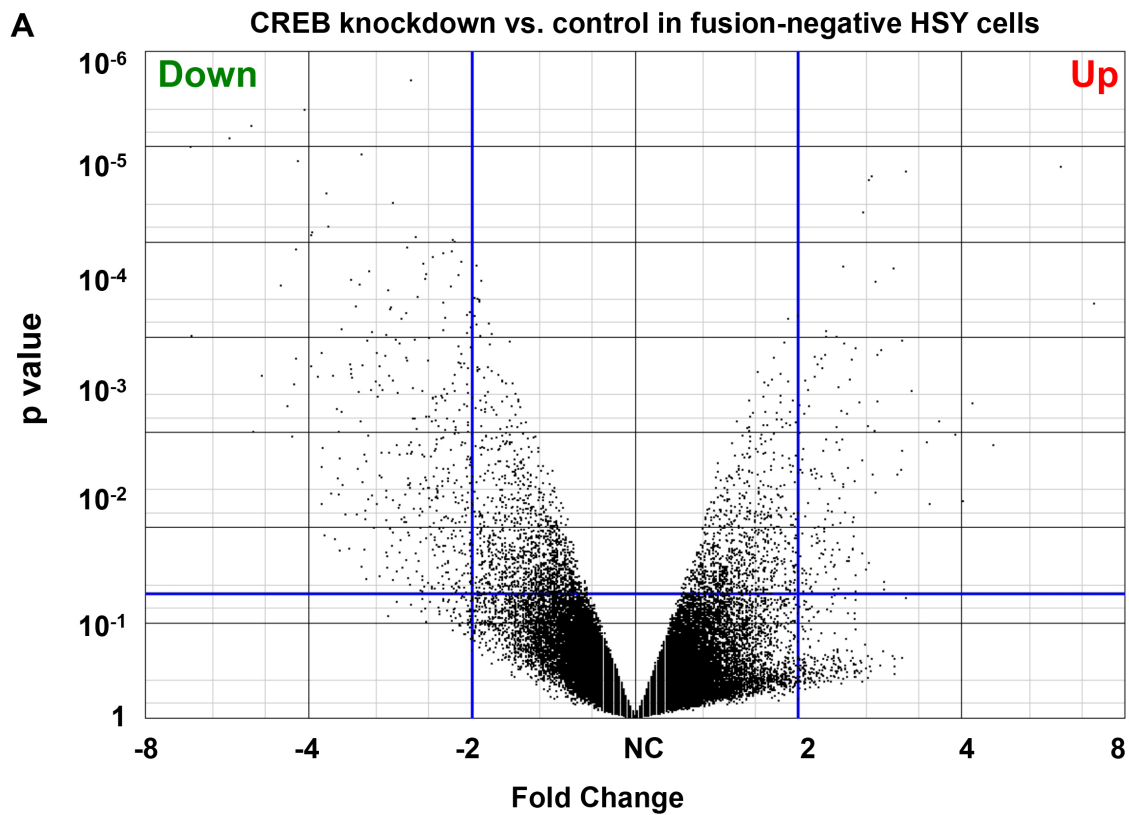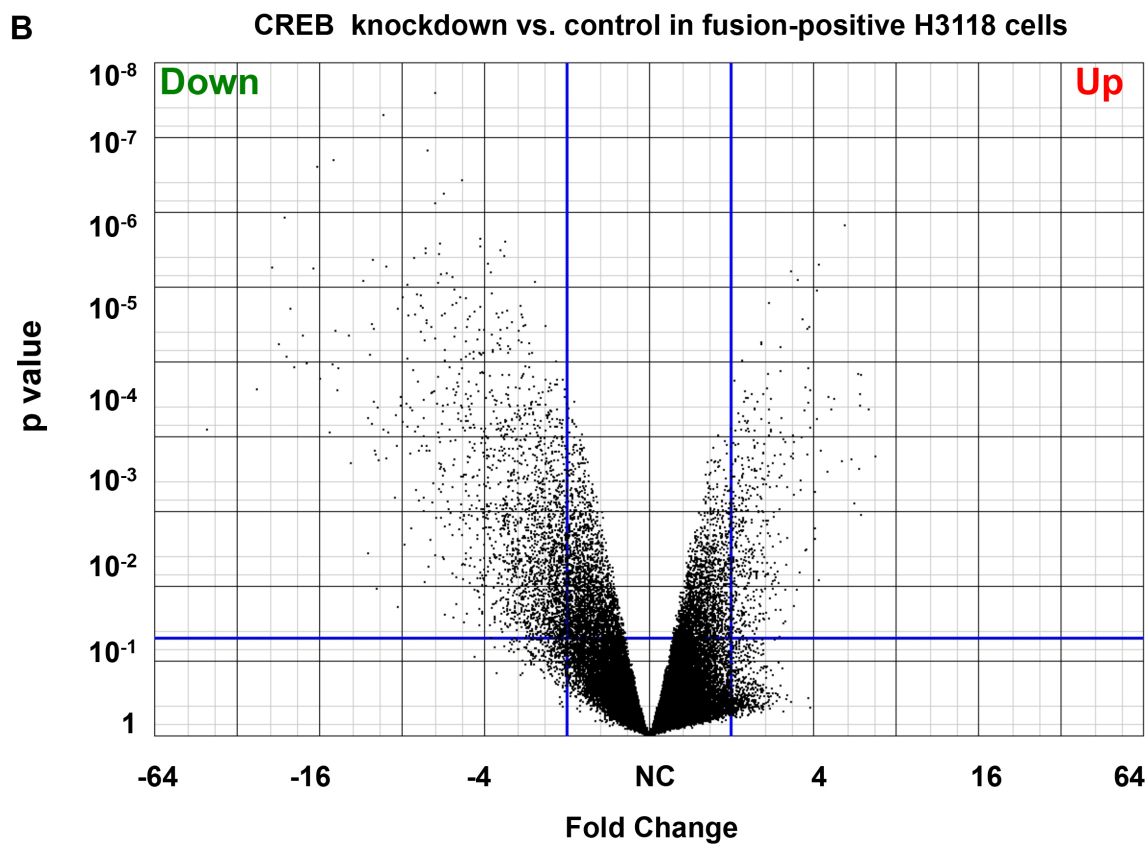

**Figure S3.** Volcano plots showed differential expression between CREB shRNA and control groups in fusion-negative HSY cells (A) and in fusion-positive H3118 cells (B). The vertical lines corresponded to 2.0-fold up and down, respectively, and the horizontal line represented a p-value of 0.05. NC denoted no change. “Down” or “Up” referred to significantly down-regulated or up-regulated genes.
