# Supplementary material for: Gene expression profiling analysis of CRTC1-MAML2 fusion oncogene-induced transcriptional program in human mucoepidermoid carcinoma cells
Source: PubMed Central journal article supplement (PMC4624166; doi:10.1186/s12885-015-1827-3), 2015-10-26
Supplement: 12885_2015_1827_MOESM2_ESM.pdf [file 12885_2015_1827_MOESM2_ESM.pdf]

**Table S1: A list of CRTC1-MAML2 fusion-regulated genes in fusion-positive H3118 MEC cells.**

Gene expression profiling analyses were performed on fusion/MAML2-knockdown H3118 cells and MAML2-knockdown HSY cells in comparison with their corresponding control cells. Differentially expressed genes with absolute fold change  $\geq 2$  and  $p < 0.05$  were identified. The differentially expressed genes in fusion/MAML2 knockdown H3118 cells showing the same regulated direction in MAML2 knockdown HSY cells were filtered out. The “positive” and “negative” signs denote up-regulated or down-regulated genes in KD compared to control groups, respectively. The asterisk indicates the common gene in different regulatory direction between HSY and H3118.

| Gene Symbol         | Gene Title                                                                   | Fold change                           | p-value  | Fold change                  | p-value |
|---------------------|------------------------------------------------------------------------------|---------------------------------------|----------|------------------------------|---------|
|                     |                                                                              | Fusion&MAML2<br>KD/Control<br>(H3118) | (H3118)  | MAML2<br>KD/Control<br>(HSY) | (HSY)   |
| <b>LINC00473</b>    | chromosome 6 open reading frame 176                                          | -37.12                                | 0        | -1.03                        | 0.87    |
| <b>DMBT1</b>        | deleted in malignant brain tumors 1                                          | -35.73                                | 0        | 1.16                         | 0.52    |
| <b>STC1</b>         | stanniocalcin 1                                                              | -21.74                                | 0        | 1.03                         | 0.83    |
| <b>LOC100288985</b> | Hypothetical protein LOC100288985                                            | -17.73                                | 0        | 1.01                         | 0.96    |
| <b>NR4A3</b>        | nuclear receptor subfamily 4, group A, member 3                              | -16.29                                | 1.00E-05 | 1.02                         | 0.95    |
| <b>AW302848</b>     | ---                                                                          | -12.93                                | 0.00013  | -1.33                        | 0.43432 |
| <b>ATP2B2</b>       | ATPase, Ca <sup>++</sup> transporting, plasma membrane 2                     | -10.68                                | 0        | -1.1                         | 0.56    |
| <b>KIAA1199</b>     | KIAA1199                                                                     | -10.29                                | 0.00094  | -1.09                        | 0.85    |
| <b>OSBP2</b>        | oxysterol binding protein 2                                                  | -9.52                                 | 1.00E-05 | 1.04                         | 0.84    |
| <b>SLC8A1</b>       | solute carrier family 8 (sodium/calcium exchanger), member 1                 | -9.25                                 | 0.00011  | -1.29                        | 0.41    |
| <b>CAPN14</b>       | calpain 14                                                                   | -9.04                                 | 0        | -1.13                        | 0.43    |
| <b>PLEKHH1</b>      | pleckstrin homology domain containing, family H (with MyTH4 domain) member 1 | -8.80                                 | 0        | -1.15                        | 0.30    |
| <b>NR4A2</b>        | nuclear receptor subfamily 4, group A, member 2                              | -8.67                                 | 2.00E-05 | -1.05                        | 0.82    |
| <b>SORBS2</b>       | sorbin and SH3 domain containing 2                                           | -8.42                                 | 6.00E-04 | -1.22                        | 0.60    |
| <b>PDE4B</b>        | phosphodiesterase 4B, cAMP-specific                                          | -8.41                                 | 0        | 1.09                         | 0.58    |
| <b>C2CD4A</b>       | C2 calcium-dependent domain containing 4A                                    | -7.84                                 | 0.00011  | -1.03                        | 0.91    |
| <b>ARG2</b>         | arginase, type II                                                            | -7.79                                 | 5.00E-05 | 1.1                          | 0.70    |
| <b>AL355689</b>     | ---                                                                          | -7.04                                 | 8.00E-05 | -1.18                        | 0.51225 |
| <b>FAM176C</b>      | family with sequence similarity 176, member C                                | -7.01                                 | 1.00E-05 | -1                           | 1.00    |
| <b>LUM</b>          | lumican                                                                      | -6.98                                 | 0.00061  | 1.19                         | 0.63    |
| <b>PECAM1</b>       | platelet/endothelial cell adhesion molecule                                  | -6.92                                 | 0        | 2.01                         | 0.00    |
| <b>UBE2QL1</b>      | ubiquitin-conjugating enzyme E2Q family-like 1                               | -6.81                                 | 0        | -1.04                        | 0.79    |
| <b>HAL</b>          | histidine ammonia-lyase                                                      | -6.79                                 | 2.00E-05 | 1.28                         | 0.25    |
| <b>AGXT2L1</b>      | alanine-glyoxylate aminotransferase 2-like 1                                 | -6.76                                 | 0.00068  | 1.17                         | 0.65    |
| <b>SMOC1</b>        | SPARC related modular calcium binding 1                                      | -6.47                                 | 0        | -1.01                        | 0.93    |
| <b>BC027448</b>     | ---                                                                          | -6.45                                 | 0.00045  | -1.15                        | 0.65648 |
| <b>BC020911</b>     | ---                                                                          | -6.44                                 | 0.00377  | 1.5                          | 0.38979 |
| <b>PPP2R1B</b>      | protein phosphatase 2, regulatory subunit A, beta                            | -6.44                                 | 0        | -1.22                        | 0.20    |
| <b>NR4A1</b>        | nuclear receptor subfamily 4, group A, member 1                              | -6.14                                 | 4.00E-05 | 1.05                         | 0.80    |
| <b>T79639</b>       | ---                                                                          | -6.06                                 | 0.02185  | -1.15                        | 0.8231  |
| <b>AA523939</b>     | ---                                                                          | -6.00                                 | 1.00E-05 | -1.01                        | 0.9645  |

|                   |                                                                                       |       |          |       |         |
|-------------------|---------------------------------------------------------------------------------------|-------|----------|-------|---------|
| <b>NPR3</b>       | natriuretic peptide receptor C/guanylate cyclase                                      | -6.00 | 0.00019  | 1.02  | 0.93    |
| <b>CREG2</b>      | cellular repressor of E1A-stimulated genes 2                                          | -5.91 | 2.00E-05 | -1.08 | 0.69    |
| <b>LSAMP</b>      | limbic system-associated membrane protein                                             | -5.83 | 6.00E-05 | -1.34 | 0.21    |
| <b>PCSK1</b>      | proprotein convertase subtilisin/kexin type 1                                         | -5.70 | 0.00048  | 1.22  | 0.52    |
| <b>RHOBTB2</b>    | Rho-related BTB domain containing 2                                                   | -5.68 | 0        | 1.06  | 0.66    |
| <b>N29850</b>     | ---                                                                                   | -5.55 | 0.00118  | -1.09 | 0.801   |
| <b>CHL1-AS2</b>   | CHL1 antisense RNA 2                                                                  | -5.54 | 0.00083  | -1.15 | 0.66    |
| <b>AW960100</b>   | ---                                                                                   | -5.52 | 0.01095  | 1.06  | 0.90602 |
| <b>LGSN</b>       | lengsin, lens protein with glutamine synthetase domain                                | -5.27 | 2.00E-05 | -1.38 | 0.10    |
| <b>GREM1</b>      | gremlin 1                                                                             | -5.21 | 0.00105  | -1.3  | 0.43    |
| <b>AA700206</b>   | ---                                                                                   | -5.02 | 2.00E-05 | -1.19 | 0.31209 |
| <b>H12214</b>     | ---                                                                                   | -4.97 | 3.00E-05 | -1    | 0.99957 |
| <b>MFSD2A</b>     | major facilitator superfamily domain containing 2A                                    | -4.96 | 5.00E-05 | -1.01 | 0.96    |
| <b>RUNX3</b>      | runt-related transcription factor 3                                                   | -4.88 | 0.00034  | 1.03  | 0.92    |
| <b>AI476341</b>   | ---                                                                                   | -4.87 | 0.00659  | -1.03 | 0.9506  |
| <b>DUSP1</b>      | dual specificity phosphatase 1                                                        | -4.81 | 0.00017  | -1.03 | 0.89    |
| <b>AI141861</b>   | ---                                                                                   | -4.75 | 0.00023  | 1.1   | 0.69989 |
| <b>SLC8A1-AS1</b> | SLC8A1 antisense RNA 1                                                                | -4.75 | 0.00808  | 1.15  | 0.75    |
| <b>AK024800</b>   | ---                                                                                   | -4.72 | 0.01546  | -1.02 | 0.96439 |
| <b>M31157</b>     | ---                                                                                   | -4.64 | 0.00116  | -1.12 | 0.70413 |
| <b>A2M</b>        | alpha-2-macroglobulin                                                                 | -4.62 | 0.00102  | 1.53  | 0.18    |
| <b>C19orf77</b>   | chromosome 19 open reading frame 77                                                   | -4.59 | 3.00E-05 | 1.09  | 0.63    |
| <b>GFRA1</b>      | GDNF family receptor alpha 1                                                          | -4.56 | 0.00966  | -1.37 | 0.49    |
| <b>AK022474</b>   | ---                                                                                   | -4.51 | 0.01964  | -1.09 | 0.86726 |
| <b>CHL1</b>       | Cell adhesion molecule with homology to L1CAM                                         | -4.47 | 0.00163  | -1.43 | 0.28    |
| <b>EHD3</b>       | EH-domain containing 3                                                                | -4.45 | 0.00061  | 1.18  | 0.54    |
| <b>ZNF331</b>     | zinc finger protein 331                                                               | -4.24 | 8.00E-05 | 1.01  | 0.95    |
| <b>IL20</b>       | interleukin 20                                                                        | -4.23 | 0.00345  | -1.19 | 0.61    |
| <b>AI452799</b>   | ---                                                                                   | -4.20 | 0.02557  | -1.12 | 0.83286 |
| <b>ENO3</b>       | enolase 3 (beta, muscle)                                                              | -4.14 | 0.00033  | -1.1  | 0.69    |
| <b>EOMES</b>      | eomesodermin                                                                          | -4.10 | 1.00E-05 | 1.07  | 0.62    |
| <b>AI806183</b>   | ---                                                                                   | -4.10 | 0.00016  | 1.01  | 0.96464 |
| <b>SLAIN1</b>     | SLAIN motif family, member 1                                                          | -4.08 | 0        | 1.07  | 0.60    |
| <b>QRFPR</b>      | pyroglutamylated RFamide peptide receptor                                             | -4.07 | 0.00011  | 1     | 0.99    |
| <b>SIK2</b>       | salt-inducible kinase 2                                                               | -4.06 | 0        | -1.01 | 0.94    |
| <b>PNLDC1</b>     | poly(A)-specific ribonuclease (PARN)-like domain containing 1                         | -4.00 | 4.00E-05 | 1.1   | 0.56    |
| <b>GREM2</b>      | gremlin 2                                                                             | -3.95 | 0.00271  | -1.04 | 0.91    |
| <b>SRGN</b>       | serglycin                                                                             | -3.95 | 0.00518  | 1.22  | 0.59    |
| <b>DUSP4</b>      | dual specificity phosphatase 4                                                        | -3.93 | 0.00155  | -1    | 0.99    |
| <b>NM_024853</b>  | ---                                                                                   | -3.92 | 0.00013  | -1.09 | 0.6543  |
| <b>PTGS1</b>      | prostaglandin-endoperoxide synthase 1 (prostaglandin G/H synthase and cyclooxygenase) | -3.89 | 0        | 1.31  | 0.04    |
| <b>PTH1H</b>      | parathyroid hormone-like hormone                                                      | -3.82 | 0.00035  | 1.35  | 0.20    |
| <b>AV702787</b>   | ---                                                                                   | -3.81 | 0.00075  | 1.03  | 0.90859 |
| <b>FZD10</b>      | frizzled homolog 10 (Drosophila)                                                      | -3.79 | 0.00034  | 1.1   | 0.67    |
| <b>LINC00323</b>  | long intergenic non-protein coding RNA 323                                            | -3.72 | 0.00249  | -1.06 | 0.84    |
| <b>WDR66</b>      | WD repeat domain 66                                                                   | -3.65 | 0.0036   | 1.2   | 0.57    |
| <b>CREB5</b>      | cAMP responsive element binding protein 5                                             | -3.63 | 0.01072  | -1.18 | 0.68    |
| <b>ENOX1</b>      | ecto-NOX disulfide-thiol exchanger 1                                                  | -3.59 | 6.00E-05 | 1.08  | 0.65    |

|                     |                                                                      |       |          |       |         |
|---------------------|----------------------------------------------------------------------|-------|----------|-------|---------|
| <b>BG112263</b>     | ---                                                                  | -3.55 | 3.00E-05 | 1.06  | 0.69217 |
| <b>TMCO7</b>        | transmembrane and coiled-coil domains 7                              | -3.54 | 7.00E-05 | 1.03  | 0.84    |
| <b>AK026914</b>     | ---                                                                  | -3.52 | 0.00237  | -1.14 | 0.64894 |
| <b>AK021804</b>     | ---                                                                  | -3.52 | 0.0043   | 1.03  | 0.92584 |
| <b>TMEM229B</b>     | transmembrane protein 229B                                           | -3.51 | 6.00E-05 | 1.05  | 0.75    |
| <b>CALCA</b>        | calcitonin-related polypeptide alpha                                 | -3.49 | 0.00643  | 1.13  | 0.72    |
| <b>AL831884</b>     | ---                                                                  | -3.47 | 0.00902  | 1.12  | 0.75966 |
| <b>SLCO4A1</b>      | solute carrier organic anion transporter family, member 4A1          | -3.46 | 0        | 1.02  | 0.87    |
| <b>MCAM</b>         | melanoma cell adhesion molecule                                      | -3.45 | 7.00E-05 | 1.07  | 0.68789 |
| <b>RPS2P45</b>      | Ribosomal protein S2 pseudogene 45                                   | -3.44 | 0.04081  | -1.13 | 0.81    |
| <b>MIR100HG</b>     | mir-100-let-7a-2 cluster host gene (non-protein)                     | -3.42 | 0.00064  | 1.02  | 0.92    |
| <b>AIG1</b>         | androgen-induced 1                                                   | -3.42 | 1.00E-05 | 1.23  | 0.11    |
| <b>N90870</b>       | ---                                                                  | -3.39 | 0.00122  | -1.11 | 0.66954 |
| <b>FAM184A</b>      | family with sequence similarity 184, member A                        | -3.38 | 8.00E-05 | 1.45  | 0.04    |
| <b>AI343000</b>     | ---                                                                  | -3.38 | 0.00097  | -1.25 | 0.35792 |
| <b>CDH11</b>        | cadherin 11, type 2, OB-cadherin (osteoblast)                        | -3.38 | 0.00044  | -1.07 | 0.74    |
| <b>AA699346</b>     | ---                                                                  | -3.36 | 0.00511  | -1.1  | 0.76413 |
| <b>IL6</b>          | interleukin 6 (interferon, beta 2)                                   | -3.35 | 0.00259  | 1.03  | 0.92    |
| <b>MCF2L-AS1</b>    | MCF2L antisense RNA 1                                                | -3.35 | 0.00045  | -1.14 | 0.53    |
| <b>NCALD</b>        | neurocalcin delta                                                    | -3.34 | 5.00E-05 | 1.22  | 0.19    |
| <b>PDE10A</b>       | phosphodiesterase 10A                                                | -3.32 | 1.00E-04 | -1.08 | 0.63    |
| <b>TECPR2</b>       | tectonin beta-propeller repeat containing 2                          | -3.31 | 0.00012  | -1.09 | 0.62    |
| <b>AL832253</b>     | ---                                                                  | -3.28 | 0.00031  | -1.19 | 0.38218 |
| <b>AW138143</b>     | ---                                                                  | -3.26 | 0.00025  | -1.04 | 0.84646 |
| <b>AW979271</b>     | ---                                                                  | -3.25 | 0.01939  | -1.12 | 0.78505 |
| <b>TNFRSF19</b>     | tumor necrosis factor receptor superfamily, member 19                | -3.24 | 0.00183  | 1.05  | 0.84    |
| <b>GRAMD1B</b>      | GRAM domain containing 1B                                            | -3.24 | 0.00167  | -1.03 | 0.91    |
| <b>LOC100506870</b> | hypothetical LOC100506870                                            | -3.24 | 0.00071  | 1.13  | 0.58    |
| <b>AL832681</b>     | ---                                                                  | -3.22 | 0.00278  | 1.01  | 0.98174 |
| <b>SLC2A14</b>      | solute carrier family 2 (facilitated glucose transporter), member 14 | -3.20 | 0.00037  | 1.03  | 0.87    |
| <b>BF508839</b>     | ---                                                                  | -3.19 | 0.00463  | -1.13 | 0.68957 |
| <b>LOC283713</b>    | hypothetical protein LOC283713                                       | -3.19 | 0.01709  | -1.32 | 0.49    |
| <b>FAM83A</b>       | family with sequence similarity 83, member A                         | -3.18 | 0.00238  | 1.01  | 0.97    |
| <b>MSI2</b>         | musashi homolog 2 (Drosophila)                                       | -3.17 | 0.00012  | 1.17  | 0.34    |
| <b>AA416756</b>     | ---                                                                  | -3.16 | 0.00578  | 1.09  | 0.77465 |
| <b>HAVCR2</b>       | hepatitis A virus cellular receptor 2                                | -3.16 | 5.00E-05 | 1.06  | 0.66    |
| <b>SFRP1</b>        | secreted frizzled-related protein 1                                  | -3.12 | 0.00018  | 1.42  | 0.06    |
| <b>F2RL2</b>        | coagulation factor II (thrombin) receptor-like 2                     | -3.11 | 0.00039  | 1.28  | 0.22    |
| <b>PLD1</b>         | phospholipase D1, phosphatidylcholine-specific                       | -3.11 | 0.00164  | -1.05 | 0.82    |
| <b>FUCA1</b>        | fucosidase, alpha-L- 1, tissue                                       | -3.09 | 0.0048   | 1.12  | 0.71    |
| <b>MGC39372</b>     | serpin peptidase inhibitor, clade B (ovalbumin), member 9 pseudogene | -3.09 | 0.00106  | 1.14  | 0.55    |
| <b>AI075770</b>     | ---                                                                  | -3.07 | 0.00108  | -1.17 | 0.48147 |
| <b>TPRG1</b>        | tumor protein p63 regulated 1                                        | -3.06 | 3.00E-05 | 1.48  | 0.01    |
| <b>RAB3A</b>        | RAB3A, member RAS oncogene family                                    | -3.05 | 0.00377  | 1.13  | 0.65    |

|                  |                                                                                        |       |          |       |         |
|------------------|----------------------------------------------------------------------------------------|-------|----------|-------|---------|
| <b>RASD1</b>     | RAS, dexamethasone-induced 1                                                           | -3.05 | 1.00E-04 | 1.02  | 0.89    |
| <b>LPPR4</b>     | lipid phosphate phosphatase-related protein type 4                                     | -3.04 | 0.00051  | -1.28 | 0.23    |
| <b>E2F2</b>      | E2F transcription factor 2                                                             | -3.03 | 0.0024   | -1.03 | 0.90    |
| <b>STEAP4</b>    | STEAP family member 4                                                                  | -3.03 | 0.00022  | 1.11  | 0.55    |
| <b>SERPINB9</b>  | serpin peptidase inhibitor, clade B (ovalbumin), member 9                              | -2.98 | 0.00472  | 1.53  | 0.16    |
| <b>FAM111B</b>   | family with sequence similarity 111, member B                                          | -2.97 | 0.01626  | -1.12 | 0.76    |
| <b>SYT12</b>     | synaptotagmin XII                                                                      | -2.97 | 0.00015  | -1.06 | 0.73    |
| <b>SMOX</b>      | spermine oxidase                                                                       | -2.95 | 0.01324  | -1.02 | 0.95    |
| <b>AW291714</b>  | ---                                                                                    | -2.95 | 0.00177  | -1.05 | 0.84341 |
| <b>PDE4D</b>     | phosphodiesterase 4D, cAMP-specific                                                    | -2.93 | 0.00034  | 1.05  | 0.79    |
| <b>MDS2</b>      | myelodysplastic syndrome 2 translocation associated                                    | -2.93 | 0.002    | -1.05 | 0.83    |
| <b>ATP6V0A4</b>  | ATPase, H+ transporting, lysosomal V0 subunit a4                                       | -2.90 | 0.00544  | -1.42 | 0.23    |
| <b>AI082004</b>  | ---                                                                                    | -2.90 | 0.00275  | -1.19 | 0.48172 |
| <b>AW138815</b>  | ---                                                                                    | -2.90 | 0.00162  | 1.13  | 0.58513 |
| <b>TNFRSF10B</b> | tumor necrosis factor receptor superfamily, member 10b                                 | -2.89 | 0.00018  | -1.11 | 0.50    |
| <b>XDH</b>       | xanthine dehydrogenase                                                                 | -2.87 | 0.02018  | -1.33 | 0.45    |
| <b>BC037339</b>  | ---                                                                                    | -2.86 | 0.00021  | 1.09  | 0.59679 |
| <b>NFASC</b>     | neurofascin                                                                            | -2.85 | 0.00054  | 1.16  | 0.43    |
| <b>AGT</b>       | angiotensinogen (serpin peptidase inhibitor, clade A, member 8)                        | -2.84 | 0.01948  | 1.3   | 0.48    |
| <b>LOC338651</b> | hypothetical LOC338651                                                                 | -2.82 | 0.04575  | -1.11 | 0.81    |
| <b>PTGES</b>     | prostaglandin E synthase                                                               | -2.81 | 0.0132   | 1.07  | 0.83    |
| <b>C1QTNF6</b>   | C1q and tumor necrosis factor related protein 6                                        | -2.81 | 0.00023  | 1.02  | 0.89    |
| <b>USP13</b>     | ubiquitin specific peptidase 13 (isopeptidase T-3)                                     | -2.80 | 0.00813  | 1.09  | 0.76    |
| <b>FSIP1</b>     | fibrous sheath interacting protein 1                                                   | -2.80 | 0.00272  | -1.06 | 0.81    |
| <b>TESC</b>      | tescalcin                                                                              | -2.80 | 0.00029  | -1.07 | 0.67    |
| <b>BICD2</b>     | bicaudal D homolog 2 (Drosophila)                                                      | -2.79 | 0.00096  | 1.28  | 0.24    |
| <b>COL4A3</b>    | collagen, type IV, alpha 3 (Goodpasture antigen)                                       | -2.79 | 0.00211  | -1.12 | 0.63    |
| <b>FLJ31485</b>  | hypothetical LOC440119                                                                 | -2.79 | 0.01063  | -1.09 | 0.79    |
| <b>SEMA3B</b>    | sema domain, immunoglobulin domain (Ig), short basic domain, secreted, (semaphorin) 3B | -2.78 | 0.00031  | -1.13 | 0.45    |
| <b>CA9</b>       | carbonic anhydrase IX                                                                  | -2.77 | 0.00402  | 1.2   | 0.47    |
| <b>XPR1</b>      | xenotropic and polytropic retrovirus receptor :                                        | -2.77 | 0.00322  | -1.24 | 0.3881  |
| <b>AI973099</b>  | ---                                                                                    | -2.76 | 5.00E-04 | 1.06  | 0.75676 |
| <b>CLDN18</b>    | claudin 18                                                                             | -2.76 | 0.00058  | 1.19  | 0.34    |
| <b>AA927995</b>  | ---                                                                                    | -2.74 | 0.00047  | -1.26 | 0.20483 |
| <b>AL833742</b>  | ---                                                                                    | -2.74 | 0.01416  | 1.12  | 0.72257 |
| <b>PON3</b>      | paraoxonase 3                                                                          | -2.74 | 0.00314  | -1.07 | 0.78    |
| <b>RAET1E</b>    | retinoic acid early transcript 1E                                                      | -2.72 | 0.02536  | 1.21  | 0.61    |
| <b>MAGIX</b>     | MAGI family member, X-linked                                                           | -2.71 | 0.00432  | 1.23  | 0.43    |
| <b>SPRY1</b>     | sprouty homolog 1, antagonist of FGF signaling (Drosophila)                            | -2.70 | 0.01542  | 1.17  | 0.64    |
| <b>N55072</b>    | ---                                                                                    | -2.70 | 0.00341  | -1.16 | 0.53791 |
| <b>AFF3</b>      | AF4/FMR2 family, member 3                                                              | -2.69 | 0.00072  | -1.07 | 0.72    |

|                   |                                                                                                               |       |          |       |         |
|-------------------|---------------------------------------------------------------------------------------------------------------|-------|----------|-------|---------|
| <b>KSR1</b>       | kinase suppressor of ras 1                                                                                    | -2.69 | 0.00355  | 1.16  | 0.53    |
| <b>ZNF462</b>     | zinc finger protein 462                                                                                       | -2.69 | 0.00885  | 1.21  | 0.51    |
| <b>AI078033</b>   | ---                                                                                                           | -2.68 | 0.00037  | -1.17 | 0.35915 |
| <b>ULBP2</b>      | UL16 binding protein 2                                                                                        | -2.67 | 0.00021  | -1.04 | 0.80    |
| <b>IRX4</b>       | iroquois homeobox 4                                                                                           | -2.67 | 0.00233  | -1.36 | 0.19    |
| <b>LOC401317</b>  | hypothetical LOC401317                                                                                        | -2.67 | 0.01249  | -1.03 | 0.92    |
| <b>CGA</b>        | glycoprotein hormones, alpha polypeptide                                                                      | -2.66 | 0.00011  | 1.48  | 0.02    |
| <b>SLC2A3</b>     | solute carrier family 2 (facilitated glucose transporter), member 3                                           | -2.65 | 0.00144  | 1.03  | 0.88    |
| <b>MPPED2</b>     | metallophosphoesterase domain containing 2                                                                    | -2.65 | 0.00261  | -1.35 | 0.21    |
| <b>CLMP</b>       | CXADR-like membrane protein                                                                                   | -2.63 | 7.00E-05 | -1.03 | 0.80    |
| <b>KYNU</b>       | kynureninase (L-kynurenine hydrolase)                                                                         | -2.63 | 0.00098  | -1.08 | 0.70    |
| <b>BF433037</b>   | ---                                                                                                           | -2.62 | 0.00046  | -1.12 | 0.49457 |
| <b>BF590850</b>   | ---                                                                                                           | -2.60 | 4.00E-05 | 1.13  | 0.30427 |
| <b>IGFN1</b>      | immunoglobulin-like and fibronectin type III domain containing 1                                              | -2.60 | 0.00162  | -1.2  | 0.38    |
| <b>C20orf132</b>  | chromosome 20 open reading frame 132                                                                          | -2.58 | 0.00086  | 1.14  | 0.48    |
| <b>SLC35G2</b>    | solute carrier family 35, member G2                                                                           | -2.57 | 0.00077  | -1.04 | 0.81    |
| <b>DUSP2</b>      | dual specificity phosphatase 2                                                                                | -2.57 | 0.00032  | 1.26  | 0.16    |
| <b>BC043169</b>   | ---                                                                                                           | -2.56 | 0.00745  | 1.05  | 0.85744 |
| <b>IL13RA2</b>    | interleukin 13 receptor, alpha 2                                                                              | -2.55 | 0.01144  | 1.09  | 0.76    |
| <b>GAS1</b>       | growth arrest-specific 1                                                                                      | -2.55 | 0.00158  | 1.03  | 0.90    |
| <b>AW843302</b>   | ---                                                                                                           | -2.54 | 0.02473  | -1.15 | 0.68565 |
| <b>MPRIP</b>      | myosin phosphatase Rho interacting protein                                                                    | -2.54 | 0.00113  | 1.05  | 0.80    |
| <b>ODC1</b>       | ornithine decarboxylase 1                                                                                     | -2.54 | 0.0019   | -1.06 | 0.79    |
| <b>PPARGC1A</b>   | peroxisome proliferator-activated receptor gamma, coactivator 1 alpha                                         | -2.54 | 0.00187  | 1     | 0.98    |
| <b>OTUD7A</b>     | OTU domain containing 7A                                                                                      | -2.54 | 0.00062  | -1.05 | 0.77    |
| <b>ANKRD9</b>     | ankyrin repeat domain 9                                                                                       | -2.52 | 0.00135  | -1.01 | 0.96    |
| <b>GPR133</b>     | G protein-coupled receptor 133                                                                                | -2.52 | 0.00279  | -1.11 | 0.63    |
| <b>LOC283140</b>  | hypothetical protein LOC283140                                                                                | -2.52 | 1.00E-04 | -1.09 | 0.49    |
| <b>ST6GALNAC3</b> | ST6 (alpha-N-acetyl-neuraminyl-2,3-beta-galactosyl-1,3)-N-acetylgalactosaminide alpha-2,6-sialyltransferase 3 | -2.51 | 6.00E-05 | -1.13 | 0.29    |
| <b>ANO3</b>       | anoctamin 3                                                                                                   | -2.50 | 0.00317  | 1.05  | 0.83    |
| <b>PIGH</b>       | phosphatidylinositol glycan anchor biosynthesis, class H                                                      | -2.50 | 0.00017  | 1.02  | 0.91    |
| <b>BF590769</b>   | ---                                                                                                           | -2.49 | 0.00036  | 1.05  | 0.73378 |
| <b>NID2</b>       | nidogen 2 (osteonidogen)                                                                                      | -2.49 | 0.00011  | 1.18  | 0.21    |
| <b>TGFB2</b>      | transforming growth factor, beta 2                                                                            | -2.48 | 0.00244  | 1.21  | 0.37    |
| <b>ALDH3B1</b>    | aldehyde dehydrogenase 3 family, member B1                                                                    | -2.48 | 9.00E-05 | 1.11  | 0.40    |
| <b>EXT1</b>       | exostosin 1                                                                                                   | -2.48 | 0.00074  | 1.03  | 0.88    |
| <b>ONECUT2</b>    | one cut homeobox 2                                                                                            | -2.47 | 0.00124  | -1.09 | 0.63    |
| <b>PSD3</b>       | pleckstrin and Sec7 domain containing 3                                                                       | -2.47 | 0.03327  | 1.26  | 0.53    |
| <b>AVPI1</b>      | arginine vasopressin-induced 1                                                                                | -2.47 | 0.00015  | -1.01 | 0.95    |
| <b>FAM43A</b>     | family with sequence similarity 43, member A                                                                  | -2.47 | 0.00646  | 1.01  | 0.97    |
| <b>NM_024912</b>  | ---                                                                                                           | -2.46 | 0.0057   | 1.21  | 0.43952 |
| <b>EYA1</b>       | eyes absent homolog 1 (Drosophila)                                                                            | -2.46 | 0.00041  | 1.27  | 0.14    |
| <b>AI289774</b>   | ---                                                                                                           | -2.46 | 0.01229  | -1.08 | 0.78157 |
| <b>RASSF10</b>    | Ras association (RalGDS/AF-6) domain family (N-terminal) member 10                                            | -2.45 | 0.00684  | -1.34 | 0.26    |

|                     |                                                                                             |       |          |       |         |
|---------------------|---------------------------------------------------------------------------------------------|-------|----------|-------|---------|
| <b>AW500340</b>     | ---                                                                                         | -2.45 | 0.00511  | 1.43  | 0.15117 |
| <b>LOC100506834</b> | hypothetical LOC100506834                                                                   | -2.45 | 0.00317  | -1.14 | 0.55    |
| <b>LOC100128653</b> | hypothetical LOC100128653                                                                   | -2.44 | 0.00019  | 1.06  | 0.64    |
| <b>TSPAN8</b>       | tetraspanin 8                                                                               | -2.43 | 0.0296   | -1    | 1.00    |
| <b>CPVL</b>         | carboxypeptidase, vitellogenic-like                                                         | -2.43 | 0.00902  | 1.09  | 0.74    |
| <b>FEZ1</b>         | fasciculation and elongation protein zeta 1<br>(zygin I)                                    | -2.42 | 9.00E-05 | 1.03  | 0.77    |
| <b>DZIP1L</b>       | DAZ interacting protein 1-like                                                              | -2.42 | 0.00033  | 1.16  | 0.32    |
| <b>SSH1</b>         | slingshot homolog 1 (Drosophila)                                                            | -2.42 | 0.00079  | -1    | 0.98    |
| <b>BF751607</b>     | ---                                                                                         | -2.41 | 0.01425  | 1.17  | 0.57802 |
| <b>PTGS2</b>        | prostaglandin-endoperoxide synthase 2<br>(prostaglandin G/H synthase and<br>cyclooxygenase) | -2.41 | 0.02817  | -1.04 | 0.90    |
| <b>ATP8B4</b>       | ATPase, class I, type 8B, member 4                                                          | -2.41 | 0.00865  | 1.3   | 0.32    |
| <b>CENPV</b>        | centromere protein V                                                                        | -2.40 | 0.00211  | -1.03 | 0.89    |
| <b>KLF9</b>         | Kruppel-like factor 9                                                                       | -2.40 | 0.00169  | 1.24  | 0.26    |
| <b>PDK3</b>         | pyruvate dehydrogenase kinase, isozyme 3                                                    | -2.40 | 0.03499  | 1.06  | 0.86    |
| <b>RNF157-AS1</b>   | RNF157 antisense RNA 1                                                                      | -2.40 | 0.01288  | 1.04  | 0.89863 |
| <b>AI761207</b>     | ---                                                                                         | -2.39 | 0.00236  | 1.05  | 0.79811 |
| <b>SOBP</b>         | sine oculis binding protein homolog<br>(Drosophila)                                         | -2.38 | 0.03683  | 1.1   | 0.78    |
| <b>AL833050</b>     | ---                                                                                         | -2.38 | 0.04945  | -1.07 | 0.86593 |
| <b>BMP8B</b>        | bone morphogenetic protein 8b                                                               | -2.38 | 0.00438  | 1.1   | 0.66    |
| <b>H79303</b>       | ---                                                                                         | -2.38 | 0.04488  | -1.06 | 0.87769 |
| <b>CD55</b>         | CD55 molecule, decay accelerating factor for<br>complement (Cromer blood group)             | -2.37 | 1.00E-04 | -1    | 0.97    |
| <b>BE219187</b>     | ---                                                                                         | -2.36 | 0.04447  | -1.08 | 0.82833 |
| <b>SNX25</b>        | sorting nexin 25                                                                            | -2.36 | 0.01993  | -1.08 | 0.79    |
| <b>WDR76</b>        | WD repeat domain 76                                                                         | -2.35 | 0.00499  | 1.03  | 0.89    |
| <b>MKX</b>          | mohawk homeobox                                                                             | -2.35 | 0.00244  | -1.03 | 0.89    |
| <b>BE271180</b>     | ---                                                                                         | -2.34 | 0.00459  | 1.1   | 0.6514  |
| <b>NFIA</b>         | Nuclear factor I/A                                                                          | -2.34 | 0.02628  | 1.04  | 0.90    |
| <b>AL038725</b>     | ---                                                                                         | -2.34 | 0.028    | -1.09 | 0.79988 |
| <b>BCAR3</b>        | breast cancer anti-estrogen resistance 3                                                    | -2.34 | 0.00029  | 1.01  | 0.92    |
| <b>PCK1</b>         | phosphoenolpyruvate carboxykinase 1<br>(soluble)                                            | -2.34 | 0.02471  | 1.71  | 0.12    |
| <b>CASP9</b>        | caspase 9, apoptosis-related cysteine<br>peptidase                                          | -2.33 | 0.00016  | 1     | 0.99    |
| <b>RND2</b>         | Rho family GTPase 2                                                                         | -2.32 | 0.00173  | 1.37  | 0.11    |
| <b>EPYC</b>         | epiphycan                                                                                   | -2.31 | 0.00142  | 1.16  | 0.39    |
| <b>C11orf86</b>     | chromosome 11 open reading frame 86                                                         | -2.31 | 0.00125  | 1.07  | 0.68    |
| <b>ZNF367</b>       | zinc finger protein 367                                                                     | -2.31 | 0.00111  | 1.02  | 0.92    |
| <b>HDAC5</b>        | histone deacetylase 5                                                                       | -2.30 | 0.00216  | 1     | 0.99    |
| <b>TRIM2</b>        | tripartite motif-containing 2                                                               | -2.30 | 0.00157  | 1.02  | 0.89    |
| <b>LOC728431</b>    | hypothetical LOC728431                                                                      | -2.30 | 0.00174  | -1    | 0.98    |
| <b>SLC25A45</b>     | solute carrier family 25, member 45                                                         | -2.30 | 0.01443  | -1.09 | 0.75    |
| <b>PCDH20</b>       | protocadherin 20                                                                            | -2.30 | 0.00226  | -1.12 | 0.55    |
| <b>BTBD16</b>       | BTB (POZ) domain containing 16                                                              | -2.29 | 0.00114  | 1.1   | 0.58    |
| <b>RHOB</b>         | ras homolog gene family, member B                                                           | -2.29 | 0.00081  | 1.1   | 0.56    |
| <b>PER1</b>         | period homolog 1 (Drosophila)                                                               | -2.28 | 0.00018  | 1.03  | 0.82    |
| <b>W57613</b>       | ---                                                                                         | -2.28 | 0.00354  | 1.21  | 0.35353 |

|                     |                                                                                 |       |         |       |         |
|---------------------|---------------------------------------------------------------------------------|-------|---------|-------|---------|
| <b>MYCL1</b>        | v-myc myelocytomatosis viral oncogene homolog 1, lung carcinoma derived (avian) | -2.28 | 0.00965 | 1.09  | 0.71    |
| <b>IL24</b>         | interleukin 24                                                                  | -2.27 | 0.04771 | 1.25  | 0.54    |
| <b>RNF150</b>       | ring finger protein 150                                                         | -2.27 | 0.00026 | 1.25  | 0.11    |
| <b>AW611560</b>     | ---                                                                             | -2.26 | 0.00519 | -1.13 | 0.56794 |
| <b>AW207701</b>     | ---                                                                             | -2.26 | 0.02039 | -1.21 | 0.50162 |
| <b>AA702409</b>     | ---                                                                             | -2.25 | 0.02683 | 1.17  | 0.6053  |
| <b>AI686793</b>     | ---                                                                             | -2.25 | 0.00066 | 1.1   | 0.50697 |
| <b>BDH1</b>         | 3-hydroxybutyrate dehydrogenase, type 1                                         | -2.25 | 0.00152 | 1.07  | 0.71    |
| <b>NEK4</b>         | NIMA (never in mitosis gene a)-related kinase 4                                 | -2.25 | 0.02606 | -1.03 | 0.93    |
| <b>MAP3K13</b>      | Mitogen-activated protein kinase kinase kinase 13                               | -2.24 | 0.01821 | -1.59 | 0.12    |
| <b>NHS</b>          | Nance-Horan syndrome (congenital cataracts and dental anomalies)                | -2.23 | 0.00261 | -1.04 | 0.82    |
| <b>ARPC5L</b>       | actin related protein 2/3 complex, subunit 5-like                               | -2.23 | 0.00244 | -1.4  | 0.09    |
| <b>GYG2</b>         | glycogenin 2                                                                    | -2.23 | 0.00261 | -1.04 | 0.81    |
| <b>ZC3H12B</b>      | zinc finger CCCH-type containing 12B                                            | -2.23 | 0.00143 | -1    | 0.98    |
| <b>AREG</b>         | amphiregulin                                                                    | -2.23 | 0.04495 | 1.11  | 0.84172 |
| <b>BF445387</b>     | ---                                                                             | -2.23 | 0.0027  | -1.15 | 0.45183 |
| <b>EDNRB</b>        | endothelin receptor type B                                                      | -2.23 | 0.00037 | -1.15 | 0.32    |
| <b>MBD5</b>         | methyl-CpG binding domain protein 5                                             | -2.23 | 0.00097 | -1.13 | 0.42    |
| <b>RSPO3</b>        | R-spondin 3 homolog ( <i>Xenopus laevis</i> )                                   | -2.23 | 0.04989 | -1.42 | 0.34    |
| <b>KIAA1549</b>     | flavin containing monooxygenase 4                                               | -2.22 | 0.00013 | -1.3  | 0.04    |
| <b>B4GALT1</b>      | UDP-Gal:betaGlcNAc beta 1,4-galactosyltransferase, polypeptide 1                | -2.21 | 0.0161  | 1.07  | 0.79    |
| <b>CLCNKB</b>       | chloride channel Kb                                                             | -2.21 | 0.02339 | -1.27 | 0.41    |
| <b>AL109691</b>     | ---                                                                             | -2.20 | 0.00964 | -1.11 | 0.64838 |
| <b>STAMBPL1</b>     | STAM binding protein-like 1                                                     | -2.20 | 0.0049  | -1.06 | 0.79    |
| <b>ZBTB38</b>       | zinc finger and BTB domain containing 38                                        | -2.19 | 0.04405 | -1.04 | 0.90    |
| <b>MCM10</b>        | minichromosome maintenance complex component 10                                 | -2.19 | 0.04848 | 1.01  | 0.97    |
| <b>SLC35F3</b>      | solute carrier family 35, member F3                                             | -2.19 | 0.02181 | 1.05  | 0.86    |
| <b>ARID5B</b>       | AT rich interactive domain 5B (MRF1-like)                                       | -2.18 | 0.00052 | 1.05  | 0.72    |
| <b>DNASE1L3</b>     | deoxyribonuclease I-like 3                                                      | -2.18 | 0.00419 | -1.13 | 0.52    |
| <b>AU157716</b>     | ---                                                                             | -2.18 | 0.00082 | 1.03  | 0.85413 |
| <b>AI274981</b>     | ---                                                                             | -2.18 | 0.03251 | -1    | 0.99629 |
| <b>AU155091</b>     | ---                                                                             | -2.17 | 0.01259 | -1.02 | 0.94603 |
| <b>FAM87A</b>       | family with sequence similarity 87, member A                                    | -2.17 | 0.00349 | -1.02 | 0.90    |
| <b>KBTBD11</b>      | kelch repeat and BTB (POZ) domain containing 11                                 | -2.17 | 0.0063  | 1.11  | 0.63    |
| <b>LOC100507455</b> | hypothetical LOC100507455                                                       | -2.17 | 0.00013 | 1.23  | 0.09    |
| <b>KIAA1430</b>     | KIAA1430                                                                        | -2.17 | 0.0074  | 1.09  | 0.68    |
| <b>PC</b>           | pyruvate carboxylase                                                            | -2.17 | 0.00064 | 1.04  | 0.78    |
| <b>PHF17</b>        | PHD finger protein 17                                                           | -2.17 | 0.00385 | 1.08  | 0.70    |
| <b>FAM216A</b>      | family with sequence similarity 216, member A                                   | -2.16 | 0.00016 | -1.03 | 0.79    |
| <b>AW969265</b>     | ---                                                                             | -2.16 | 0.01838 | -1    | 0.98722 |
| <b>LOC100505498</b> | uncharacterized LOC100505498                                                    | -2.16 | 0.00894 | -1.48 | 0.11    |
| <b>PRKCH</b>        | protein kinase C, eta                                                           | -2.16 | 0.00061 | 1.56  | 0.01    |
| <b>SAMD13</b>       | sterile alpha motif domain containing 13                                        | -2.16 | 0.03066 | -1.44 | 0.25    |
| <b>AW263539</b>     | ---                                                                             | -2.16 | 0.04293 | 1.09  | 0.79281 |

|                     |                                                                                        |       |         |       |         |
|---------------------|----------------------------------------------------------------------------------------|-------|---------|-------|---------|
| <b>PXDC1</b>        | PX domain containing 1                                                                 | -2.16 | 0.00584 | -1.16 | 0.47    |
| <b>BM664532</b>     | ---                                                                                    | -2.15 | 0.01996 | 1     | 0.99844 |
| <b>ALDH6A1</b>      | aldehyde dehydrogenase 6 family, member A1                                             | -2.15 | 0.01516 | 1.3   | 0.32    |
| <b>AI434789</b>     | ---                                                                                    | -2.15 | 0.0293  | 1.09  | 0.77744 |
| <b>EPHX4</b>        | epoxide hydrolase 4                                                                    | -2.15 | 0.00106 | -1.22 | 0.21    |
| <b>AA778565</b>     | ---                                                                                    | -2.15 | 0.01204 | 1.01  | 0.9611  |
| <b>SMIM2</b>        | small integral membrane protein 2                                                      | -2.15 | 0.02342 | 1.05  | 0.85    |
| <b>SH3GL2</b>       | SH3-domain GRB2-like 2                                                                 | -2.15 | 0.00032 | 1.03  | 0.81    |
| <b>AI300077</b>     | ---                                                                                    | -2.15 | 0.00412 | 1.42  | 0.09748 |
| <b>BRI3BP</b>       | BRI3 binding protein                                                                   | -2.15 | 0.0253  | 1.13  | 0.67    |
| <b>LOC100506021</b> | hypothetical LOC100506021                                                              | -2.15 | 0.01054 | -1.05 | 0.84    |
| <b>DLGAP1-AS1</b>   | DLGAP1 antisense RNA 1                                                                 | -2.14 | 0.04809 | -1.28 | 0.46    |
| <b>GLS2</b>         | glutaminase 2 (liver, mitochondrial)                                                   | -2.14 | 0.01315 | 1.05  | 0.83    |
| <b>ITPR1</b>        | inositol 1,4,5-triphosphate receptor, type 1                                           | -2.14 | 0.00162 | -1.01 | 0.95    |
| <b>ZNF141</b>       | zinc finger protein 141                                                                | -2.13 | 0.00661 | -1.05 | 0.80    |
| <b>FKBP7</b>        | FK506 binding protein 7                                                                | -2.13 | 0.00893 | 1.11  | 0.63    |
| <b>ZNF280D</b>      | zinc finger protein 280D                                                               | -2.13 | 0.00421 | -1.4  | 0.11    |
| <b>MCF2L</b>        | MCF.2 cell line derived transforming sequence-like                                     | -2.13 | 0.00022 | -1.08 | 0.50    |
| <b>WIPF1</b>        | WAS/WASL interacting protein family, member 1                                          | -2.13 | 0.00149 | -1.03 | 0.86    |
| <b>CMIP</b>         | c-Maf inducing protein                                                                 | -2.12 | 0.00036 | 1.04  | 0.72796 |
| <b>PTP4A1</b>       | protein tyrosine phosphatase type IVA, member 1                                        | -2.12 | 0.00068 | 1.02  | 0.91    |
| <b>DST</b>          | dystonin                                                                               | -2.11 | 0.03694 | -1.38 | 0.30    |
| <b>LOC158696</b>    | hypothetical LOC158696                                                                 | -2.11 | 0.00213 | -1.02 | 0.88    |
| <b>TYMS</b>         | thymidylate synthetase                                                                 | -2.10 | 0.02143 | -1.03 | 0.90    |
| <b>SLC7A1</b>       | solute carrier family 7 (cationic amino acid transporter, $\gamma$ + system), member 1 | -2.10 | 0.00061 | -1.19 | 0.21    |
| <b>BCL7A</b>        | B-cell CLL/lymphoma 7A                                                                 | -2.10 | 0.00085 | 1.12  | 0.42    |
| <b>MSX2</b>         | msh homeobox 2                                                                         | -2.10 | 0.01319 | 1.71  | 0.05    |
| <b>BC042893</b>     | ---                                                                                    | -2.09 | 0.0284  | -1.06 | 0.84067 |
| <b>EN2</b>          | engrailed homeobox 2                                                                   | -2.09 | 0.01431 | 1.03  | 0.91    |
| <b>AW293012</b>     | ---                                                                                    | -2.09 | 0.00093 | -1.16 | 0.30585 |
| <b>MCTP2</b>        | multiple C2 domains, transmembrane 2                                                   | -2.09 | 0.00189 | 1.03  | 0.84    |
| <b>FNDC3A</b>       | Fibronectin type III domain containing 3A ectonucleotide                               | -2.09 | 0.04589 | -1.48 | 0.24    |
| <b>ENPP2</b>        | pyrophosphatase/phosphodiesterase 2                                                    | -2.08 | 0.00621 | 1.38  | 0.14    |
| <b>LOC100287676</b> | Hypothetical protein LOC100287676                                                      | -2.08 | 0.00125 | 1.03  | 0.86    |
| <b>AA088388</b>     | ---                                                                                    | -2.08 | 0.04262 | -1.32 | 0.37818 |
| <b>AA057437</b>     | ---                                                                                    | -2.08 | 0.00985 | -1.26 | 0.31258 |
| <b>AI935541</b>     | ---                                                                                    | -2.07 | 0.00942 | -1.14 | 0.55583 |
| <b>CDK6</b>         | cyclin-dependent kinase 6                                                              | -2.07 | 0.00134 | 1.02  | 0.88    |
| <b>GPR98</b>        | G protein-coupled receptor 98                                                          | -2.07 | 0.01515 | 1.16  | 0.53    |
| <b>ORF1</b>         | hypothetical protein, clone pT-Adv JuaX22                                              | -2.07 | 0.01191 | 1.15  | 0.53    |
| <b>CYFIP2</b>       | cytoplasmic FMR1 interacting protein 2                                                 | -2.07 | 0.0021  | 1.43  | 0.05    |
| <b>ZNF275</b>       | zinc finger protein 275                                                                | -2.07 | 0.04737 | 1.25  | 0.48    |
| <b>DPY19L2P2</b>    | dpy-19-like 2 pseudogene 2 (C. elegans)                                                | -2.07 | 0.01003 | -1.16 | 0.51    |
| <b>MDM2</b>         | Mdm2 p53 binding protein homolog (mouse)                                               | -2.07 | 0.00477 | 1.1   | 0.63    |
| <b>AL049245</b>     | ---                                                                                    | -2.06 | 0.00369 | -1.07 | 0.70243 |
| <b>PRTG</b>         | protogenin                                                                             | -2.06 | 0.0091  | 1     | 1.00    |



|                     |                                                                |       |         |       |         |
|---------------------|----------------------------------------------------------------|-------|---------|-------|---------|
| <b>TOB1</b>         | transducer of ERBB2, 1                                         | -2.06 | 0.03573 | -1.03 | 0.92    |
| <b>SSFA2</b>        | sperm specific antigen 2                                       | -2.05 | 0.00073 | -1.21 | 0.17    |
| <b>LINC00521</b>    | long intergenic non-protein coding RNA 521                     | -2.05 | 0.00885 | -1.1  | 0.65    |
| <b>ANKH</b>         | ankylosis, progressive homolog (mouse)                         | -2.05 | 0.01833 | -1.35 | 0.24    |
| <b>ATPAF1</b>       | ATP synthase mitochondrial F1 complex assembly factor 1        | -2.05 | 0.00097 | -1.33 | 0.07    |
| <b>HCG11</b>        | HLA complex group 11                                           | -2.04 | 0.00878 | 1.08  | 0.72    |
| <b>LOC100505974</b> | uncharacterized LOC100505974                                   | -2.04 | 0.00592 | -1.05 | 0.81    |
| <b>PLLP</b>         | plasmalipin                                                    | -2.04 | 0.00578 | -1.07 | 0.73    |
| <b>NCAM1</b>        | Neural cell adhesion molecule 1                                | -2.04 | 0.00845 | -1.49 | 0.08    |
| <b>REEP1</b>        | receptor accessory protein 1                                   | -2.04 | 0.00111 | -1    | 1.00    |
| <b>NAV2</b>         | neuron navigator 2                                             | -2.04 | 0.00061 | -1.41 | 0.03    |
| <b>SMAD2</b>        | SMAD family member 2                                           | -2.04 | 0.00215 | -1    | 0.98    |
| <b>TMEM231</b>      | transmembrane protein 231                                      | -2.03 | 0.02144 | -1.01 | 0.98    |
| <b>VEPH1</b>        | ventricular zone expressed PH domain homolog 1 (zebrafish)     | -2.03 | 0.01998 | 1.05  | 0.84    |
| <b>CAMK2B</b>       | calcium/calmodulin-dependent protein kinase II beta            | -2.03 | 0.00028 | 1     | 0.99    |
| <b>KRT23</b>        | keratin 23 (histone deacetylase inducible)                     | -2.03 | 0.0272  | -1.29 | 0.35    |
| <b>C11orf96</b>     | chromosome 11 open reading frame 96                            | -2.03 | 0.01409 | -1.42 | 0.15    |
| <b>RGCC</b>         | regulator of cell cycle                                        | -2.03 | 0.03419 | 1.08  | 0.79    |
| <b>ADAMTS8</b>      | ADAM metalloproteinase with thrombospondin type 1 motif, 8     | -2.02 | 0.00352 | -1.12 | 0.52    |
| <b>BC041941</b>     | ---                                                            | -2.02 | 0.04639 | -1.11 | 0.73358 |
| <b>ATOH8</b>        | Atonal homolog 8 (Drosophila)                                  | -2.02 | 0.03864 | 1.16  | 0.61    |
| <b>RORA</b>         | RAR-related orphan receptor A                                  | -2.02 | 0.00052 | -1.16 | 0.25    |
| <b>LYAR</b>         | Ly1 antibody reactive homolog (mouse)                          | -2.01 | 0.00091 | -1.17 | 0.25    |
| <b>SNAPC1</b>       | small nuclear RNA activating complex, polypeptide 1, 43kDa     | -2.01 | 0.00323 | 1.11  | 0.53    |
| <b>TRAF3IP3</b>     | TRAF3 interacting protein 3                                    | -2.01 | 0.00273 | 1.28  | 0.16    |
| <b>UQCRB</b>        | ubiquinol-cytochrome c reductase binding protein               | -2.01 | 0.00074 | -1.19 | 0.21    |
| <b>ACSBG1</b>       | acyl-CoA synthetase bubblegum family member 1                  | -2.01 | 0.0213  | -1.29 | 0.31    |
| <b>ERGIC1</b>       | endoplasmic reticulum-golgi intermediate compartment (ERGIC) 1 | -2.01 | 0.00621 | -1.04 | 0.84    |
| <b>PRKAG2-AS1</b>   | PRKAG2 antisense RNA 1                                         | -2.01 | 0.01612 | 1.15  | 0.54    |
| <b>DHX30</b>        | DEAH (Asp-Glu-Ala-His) box polypeptide 30                      | -2.01 | 0.0169  | -1.03 | 0.91    |
| <b>NOS1</b>         | nitric oxide synthase 1 (neuronal)                             | -2.01 | 0.01753 | -1.04 | 0.87    |
| <b>DLX6-AS1</b>     | DLX6 antisense RNA 1                                           | -2.00 | 0.02707 | -1.28 | 0.36    |
| <b>AXL</b>          | AXL receptor tyrosine kinase                                   | -2.00 | 0.00608 | 1.01  | 0.98    |
| <b>LINC00313</b>    | long intergenic non-protein coding RNA 313                     | -2.00 | 0.01814 | 1.13  | 0.60    |
| <b>BU789637</b>     | ---                                                            | 2.00  | 0.01924 | -1.1  | 0.68819 |
| <b>CDH8</b>         | cadherin 8, type 2                                             | 2.00  | 0.03039 | 1.53  | 0.14    |
| <b>G6PD</b>         | glucose-6-phosphate dehydrogenase                              | 2.00  | 0.01192 | 1.08  | 0.71    |
| <b>ITGB3</b>        | integrin, beta 3 (platelet glycoprotein IIIa, antigen CD61)    | 2.00  | 0.01198 | -1.1  | 0.65    |
| <b>W87626</b>       | ---                                                            | 2.00  | 0.01801 | -1.18 | 0.48782 |
| <b>MEX3B</b>        | mex-3 homolog B (C. elegans)                                   | 2.01  | 0.00195 | 1.26  | 0.16    |
| <b>NREP</b>         | neuronal regeneration related protein homolog                  | 2.01  | 0.04319 | -1.37 | 0.30    |
| <b>IL17RD</b>       | interleukin 17 receptor D                                      | 2.01  | 0.00123 | 1.1   | 0.52    |
| <b>HOXA10</b>       | homeobox A10                                                   | 2.01  | 0.00161 | 1.37  | 0.06    |
| <b>ITPKC</b>        | inositol 1,4,5-trisphosphate 3-kinase C                        | 2.01  | 0.01452 | 1.17  | 0.50    |
| <b>TPRXL</b>        | tetra-peptide repeat homeobox-like                             | 2.01  | 0.01069 | -1.24 | 0.32    |

|                     |                                                                                                                                                  |      |          |       |         |
|---------------------|--------------------------------------------------------------------------------------------------------------------------------------------------|------|----------|-------|---------|
| <b>GNG2</b>         | guanine nucleotide binding protein (G protein), gamma 2                                                                                          | 2.01 | 0.00163  | -1.07 | 0.64    |
| <b>FAT2</b>         | FAT tumor suppressor homolog 2 (Drosophila)                                                                                                      | 2.01 | 0.02442  | 1.14  | 0.62    |
| <b>PDZK1IP1</b>     | PDZK1 interacting protein 1                                                                                                                      | 2.02 | 0.01489  | 1.24  | 0.35    |
| <b>PDGFRA</b>       | platelet-derived growth factor receptor, alpha polypeptide                                                                                       | 2.02 | 0.01614  | 1.01  | 0.96    |
| <b>CMTM7</b>        | CKLF-like MARVEL transmembrane domain containing 7                                                                                               | 2.02 | 0.04259  | 1.33  | 0.35    |
| <b>RRAS</b>         | related RAS viral (r-ras) oncogene homolog                                                                                                       | 2.02 | 6.00E-04 | -1.01 | 0.93    |
| <b>BF724621</b>     | ---                                                                                                                                              | 2.02 | 0.00546  | -1.25 | 0.25831 |
| <b>DGKH</b>         | diacylglycerol kinase, eta                                                                                                                       | 2.02 | 0.00133  | -1.17 | 0.30    |
| <b>GAL3ST4</b>      | galactose-3-O-sulfotransferase 4                                                                                                                 | 2.02 | 0.00027  | 1.09  | 0.45    |
| <b>APOL6</b>        | apolipoprotein L, 6                                                                                                                              | 2.02 | 0.02016  | 1.27  | 0.34    |
| <b>DYSF</b>         | dysferlin, limb girdle muscular dystrophy 2B (autosomal recessive)                                                                               | 2.03 | 0.00116  | -1.12 | 0.43    |
| <b>HS3ST1</b>       | heparan sulfate (glucosamine) 3-O-sulfotransferase 1                                                                                             | 2.03 | 0.02889  | -1.34 | 0.30    |
| <b>FLJ42709</b>     | hypothetical LOC441094                                                                                                                           | 2.03 | 0.01393  | 1.05  | 0.82    |
| <b>PADI3</b>        | peptidyl arginine deiminase, type III                                                                                                            | 2.03 | 0.00887  | -1.2  | 0.39    |
| <b>PHLDB1</b>       | pleckstrin homology-like domain, family B, member 1                                                                                              | 2.03 | 0.00347  | 1.03  | 0.88    |
| <b>RARRES3</b>      | retinoic acid receptor responder (tazarotene induced) 3                                                                                          | 2.03 | 0.04827  | 1.06  | 0.84    |
| <b>LOC100126784</b> | hypothetical LOC100126784                                                                                                                        | 2.03 | 0.00581  | -1.04 | 0.82    |
| <b>ROR1</b>         | receptor tyrosine kinase-like orphan receptor 1                                                                                                  | 2.03 | 0.0211   | 1.7   | 0.06    |
| <b>PRKCA</b>        | protein kinase C, alpha                                                                                                                          | 2.04 | 0.00066  | 1.02  | 0.88    |
| <b>MIR205HG</b>     | MIR205 host gene (non-protein coding)                                                                                                            | 2.04 | 0.03495  | -1.15 | 0.63    |
| <b>LOC100506621</b> | hypothetical LOC100506621                                                                                                                        | 2.04 | 0.03095  | 1.14  | 0.63    |
| <b>ENDOD1</b>       | endonuclease domain containing 1                                                                                                                 | 2.04 | 0.00857  | -1.16 | 0.47    |
| <b>AA644178</b>     | ---                                                                                                                                              | 2.04 | 0.00168  | 1.01  | 0.95939 |
| <b>DFNB31</b>       | deafness, autosomal recessive 31                                                                                                                 | 2.04 | 0.01215  | -1.05 | 0.83    |
| <b>GPR161</b>       | G protein-coupled receptor 161                                                                                                                   | 2.04 | 0.03426  | -1.01 | 0.98    |
| <b>IRS1</b>         | insulin receptor substrate 1                                                                                                                     | 2.05 | 0.04193  | 1.13  | 0.69    |
| <b>JAKMIP2</b>      | janus kinase and microtubule interacting protein 2                                                                                               | 2.05 | 0.01565  | -1.09 | 0.72    |
| <b>GRIK2</b>        | glutamate receptor, ionotropic, kainate 2                                                                                                        | 2.05 | 0.00074  | 1.03  | 0.83    |
| <b>AKR1C2</b>       | aldo-keto reductase family 1, member C2 (dihydrodiol dehydrogenase 2; bile acid binding protein; 3-alpha hydroxysteroid dehydrogenase, type III) | 2.05 | 0.04602  | -1.21 | 0.54    |
| <b>FOXL1</b>        | forkhead box L1                                                                                                                                  | 2.05 | 0.0219   | -1.15 | 0.59    |
| <b>PLCB4</b>        | phospholipase C, beta 4                                                                                                                          | 2.05 | 0.02032  | 1.03  | 0.91    |
| <b>CRABP2</b>       | cellular retinoic acid binding protein 2                                                                                                         | 2.05 | 0.00825  | -1.03 | 0.88    |
| <b>GPR37</b>        | G protein-coupled receptor 37 (endothelin receptor type B-like)                                                                                  | 2.05 | 0.02429  | -1.03 | 0.92    |
| <b>LOC100507164</b> | hypothetical LOC100507164                                                                                                                        | 2.06 | 0.01102  | 1.12  | 0.60    |
| <b>CXCL1</b>        | chemokine (C-X-C motif) ligand 1 (melanoma growth stimulating activity, alpha)                                                                   | 2.06 | 0.00038  | -1.27 | 0.08    |
| <b>NOX4</b>         | NADPH oxidase 4                                                                                                                                  | 2.06 | 0.01202  | -1.42 | 0.15    |

|                  |                                                                          |      |         |       |         |
|------------------|--------------------------------------------------------------------------|------|---------|-------|---------|
| <b>CCDC80</b>    | coiled-coil domain containing 80                                         | 2.06 | 0.00254 | 1.34  | 0.11    |
| <b>GRIA2</b>     | glutamate receptor, ionotropic, AMPA 2                                   | 2.06 | 0.00059 | -1.24 | 0.12    |
| <b>PDE5A</b>     | phosphodiesterase 5A, cGMP-specific                                      | 2.06 | 0.02609 | -1    | 1.00    |
| <b>STON2</b>     | Stonin 2                                                                 | 2.06 | 0.0371  | 1     | 0.99    |
| <b>AA809487</b>  | ---                                                                      | 2.06 | 0.00884 | 1.16  | 0.49235 |
| <b>ACPP</b>      | acid phosphatase, prostate                                               | 2.06 | 0.00135 | 1.51  | 0.02    |
| <b>GBP4</b>      | guanylate binding protein 4                                              | 2.07 | 0.00809 | -1.13 | 0.57    |
| <b>IVNS1ABP</b>  | influenza virus NS1A binding protein                                     | 2.07 | 0.00016 | 1.1   | 0.36    |
| <b>AW953794</b>  | ---                                                                      | 2.07 | 0.01007 | 1.02  | 0.94143 |
| <b>WNT9A</b>     | wingless-type MMTV integration site family, member 9A                    | 2.07 | 0.00489 | -1.08 | 0.68    |
| <b>AK021505</b>  | ---                                                                      | 2.08 | 0.002   | -1.06 | 0.71778 |
| <b>PI3</b>       | peptidase inhibitor 3, skin-derived                                      | 2.08 | 0.03815 | 1.02  | 0.94    |
| <b>SYNPO</b>     | synaptopodin                                                             | 2.08 | 0.00921 | -1.05 | 0.83    |
| <b>GREB1</b>     | growth regulation by estrogen in breast cancer 1                         | 2.08 | 0.00014 | 1.13  | 0.26    |
| <b>NGEF</b>      | neuronal guanine nucleotide exchange factor                              | 2.08 | 0.00323 | 1.24  | 0.25    |
| <b>RASL11B</b>   | RAS-like, family 11, member B                                            | 2.08 | 0.00127 | -1.07 | 0.63    |
| <b>TP53I3</b>    | tumor protein p53 inducible protein 3                                    | 2.09 | 0.00058 | 1.04  | 0.74    |
| <b>ATP1B1</b>    | ATPase, Na <sup>+</sup> /K <sup>+</sup> transporting, beta 1 polypeptide | 2.09 | 0.00895 | 1.01  | 0.95    |
| <b>CIITA</b>     | class II, major histocompatibility complex, transactivator               | 2.09 | 0.01009 | -1    | 0.98    |
| <b>SYNPO2</b>    | synaptopodin 2                                                           | 2.09 | 0.00858 | -1.12 | 0.59    |
| <b>DAPP1</b>     | dual adaptor of phosphotyrosine and 3-phosphoinositides                  | 2.09 | 0.00312 | -1.04 | 0.80    |
| <b>IRAK2</b>     | interleukin-1 receptor-associated kinase 2                               | 2.10 | 0.00105 | 1.45  | 0.03    |
| <b>CAMK2D</b>    | calcium/calmodulin-dependent protein kinase II delta                     | 2.10 | 0.00099 | 1.11  | 0.46    |
| <b>CYBASC3</b>   | cytochrome b, ascorbate dependent 3                                      | 2.10 | 0.00236 | 1.03  | 0.88    |
| <b>PDE1C</b>     | phosphodiesterase 1C, calmodulin-dependent 70kDa                         | 2.11 | 0.00514 | 1.11  | 0.59    |
| <b>GBP3</b>      | guanylate binding protein 3                                              | 2.11 | 0.00464 | 1.17  | 0.41    |
| <b>FRMD4B</b>    | FERM domain containing 4B                                                | 2.11 | 0.01174 | 1.3   | 0.27    |
| <b>ALOX5AP</b>   | arachidonate 5-lipoxygenase-activating protein                           | 2.11 | 0.00802 | -1.09 | 0.70    |
| <b>REPS2</b>     | RALBP1 associated Eps domain containing 2                                | 2.12 | 0.00074 | -1.08 | 0.59    |
| <b>PITPNM3</b>   | PITPNM family member 3                                                   | 2.12 | 0.00107 | 1.01  | 0.93    |
| <b>CLSTN2</b>    | calsyntenin 2                                                            | 2.13 | 0.00077 | 1.01  | 0.96    |
| <b>GADD45B</b>   | Growth arrest and DNA-damage-inducible, beta                             | 2.13 | 0.0233  | 1.35  | 0.29    |
| <b>KIAA0226L</b> | KIAA0226-like                                                            | 2.13 | 0.01072 | 1.04  | 0.88    |
| <b>LINC00626</b> | long intergenic non-protein coding RNA 626                               | 2.13 | 0.00133 | -1.3  | 0.12    |
| <b>NGB</b>       | neuroglobin                                                              | 2.13 | 0.00131 | 1.02  | 0.88    |
| <b>TMCC2</b>     | transmembrane and coiled-coil domain family 2                            | 2.13 | 0.0035  | 1.08  | 0.69    |
| <b>RDH16</b>     | retinol dehydrogenase 16 (all-trans)                                     | 2.14 | 0.00598 | -1.16 | 0.48    |
| <b>BEAN1</b>     | brain expressed, associated with NEDD4, 1                                | 2.14 | 0.00478 | 1.12  | 0.56    |
| <b>CYP1B1</b>    | cytochrome P450, family 1, subfamily B, polypeptide 1                    | 2.14 | 0.00679 | 1.07  | 0.76    |
| <b>AW292830</b>  | ---                                                                      | 2.14 | 0.00133 | 1.02  | 0.91966 |
| <b>DDX60L</b>    | DEAD (Asp-Glu-Ala-Asp) box polypeptide 60-like                           | 2.14 | 0.02071 | 1.09  | 0.75    |

|                     |                                                                                                 |      |         |       |         |
|---------------------|-------------------------------------------------------------------------------------------------|------|---------|-------|---------|
| <b>FBLIM1</b>       | filamin binding LIM protein 1                                                                   | 2.14 | 0.01025 | -1.01 | 0.95    |
| <b>WFDC2</b>        | WAP four-disulfide core domain 2                                                                | 2.14 | 0.00652 | 1.15  | 0.50    |
| <b>KIAA1841</b>     | KIAA1841                                                                                        | 2.15 | 0.00068 | -1.06 | 0.66    |
| <b>IGSF9</b>        | immunoglobulin superfamily, member 9                                                            | 2.15 | 0.00934 | 1.04  | 0.88    |
| <b>AU151465</b>     | ---                                                                                             | 2.15 | 0.00373 | -1.22 | 0.31827 |
| <b>ETS1</b>         | v-ets erythroblastosis virus E26 oncogene homolog 1 (avian)                                     | 2.17 | 0.00029 | -1.02 | 0.86    |
| <b>AW044663</b>     | ---                                                                                             | 2.17 | 0.01897 | 1.12  | 0.67908 |
| <b>GFPT2</b>        | glutamine-fructose-6-phosphate transaminase 2                                                   | 2.17 | 0.02835 | -1.08 | 0.80    |
| <b>SERTAD4</b>      | SERTA domain containing 4                                                                       | 2.17 | 0.00122 | -1.1  | 0.54    |
| <b>MMP2</b>         | matrix metalloproteinase 2 (gelatinase A, 72kDa gelatinase, 72kDa type IV collagenase)          | 2.17 | 0.01207 | -1.06 | 0.81    |
| <b>WNT10A</b>       | Wingless-type MMTV integration site family, member 10A                                          | 2.17 | 0.00265 | -1.2  | 0.33    |
| <b>LOC728978</b>    | uncharacterized LOC728978                                                                       | 2.18 | 0.00056 | 1     | 0.99    |
| <b>MARCKS</b>       | myristoylated alanine-rich protein kinase C substrate                                           | 2.18 | 0.00228 | 1.13  | 0.50    |
| <b>HRH1</b>         | histamine receptor H1                                                                           | 2.18 | 0.00533 | 1.2   | 0.39    |
| <b>TFEB</b>         | transcription factor EB                                                                         | 2.18 | 0.00165 | -1.16 | 0.39    |
| <b>ATP6V0D2</b>     | ATPase, H+ transporting, lysosomal 38kDa, V0 subunit d2                                         | 2.18 | 0.02069 | -1.39 | 0.25    |
| <b>SGK223</b>       | homolog of rat pragma of Rnd2                                                                   | 2.19 | 0.00839 | 1.17  | 0.48    |
| <b>ATP2B4</b>       | ATPase, Ca++ transporting, plasma membrane 4                                                    | 2.19 | 0.01555 | 1.12  | 0.67    |
| <b>KIF3C</b>        | kinesin family member 3C                                                                        | 2.19 | 0.00127 | 1.13  | 0.46    |
| <b>PDGFB</b>        | platelet-derived growth factor beta polypeptide (simian sarcoma viral (v-sis) oncogene homolog) | 2.19 | 0.00056 | 1.04  | 0.76    |
| <b>LOC100292680</b> | hypothetical LOC100292680                                                                       | 2.19 | 0.00376 | -1.16 | 0.45    |
| <b>AI935710</b>     | ---                                                                                             | 2.20 | 0.00784 | -1.31 | 0.24662 |
| <b>CDK15</b>        | cyclin-dependent kinase 15                                                                      | 2.20 | 0.01575 | -1.24 | 0.42    |
| <b>CYP4F3</b>       | cytochrome P450, family 4, subfamily F, polypeptide 3                                           | 2.21 | 0.0361  | 1.12  | 0.73    |
| <b>LYST</b>         | lysosomal trafficking regulator                                                                 | 2.21 | 0.00093 | 1.19  | 0.26    |
| <b>NLRC5</b>        | NLR family, CARD domain containing 5                                                            | 2.21 | 0.00966 | 1.13  | 0.60    |
| <b>FN1</b>          | fibronectin 1                                                                                   | 2.23 | 0.00031 | -1.29 | 0.08    |
| <b>LOX</b>          | lysyl oxidase                                                                                   | 2.23 | 0.00388 | 1.02  | 0.91    |
| <b>PRR5L</b>        | proline rich 5 like                                                                             | 2.23 | 0.00145 | -1    | 0.99    |
| <b>RPRM</b>         | reprimin, TP53 dependent G2 arrest mediator candidate                                           | 2.23 | 0.00472 | -1.13 | 0.55    |
| <b>PTGER4</b>       | prostaglandin E receptor 4 (subtype EP4)                                                        | 2.23 | 0.04292 | -1.07 | 0.85    |
| <b>GLIPR1</b>       | GLI pathogenesis-related 1                                                                      | 2.23 | 0.03537 | 1.08  | 0.80    |
| <b>LOC643792</b>    | contactin associated protein-like 3 pseudogene                                                  | 2.23 | 0.00128 | 1.17  | 0.36    |
| <b>RUNDC3B</b>      | RUN domain containing 3B                                                                        | 2.23 | 0.03495 | 1.04  | 0.91    |
| <b>PLEKHG1</b>      | pleckstrin homology domain containing, family G (with RhoGef domain) member 1                   | 2.24 | 0.00093 | 1.08  | 0.62    |
| <b>NAV3</b>         | neuron navigator 3                                                                              | 2.24 | 0.01017 | -1.03 | 0.89    |
| <b>CA430162</b>     | ---                                                                                             | 2.25 | 0.00075 | 1.15  | 0.36079 |
| <b>HOMER2</b>       | homer homolog 2 (Drosophila)                                                                    | 2.25 | 0.00028 | 1.04  | 0.74    |
| <b>COL6A3</b>       | collagen, type VI, alpha 3                                                                      | 2.25 | 0.00034 | -1.11 | 0.45    |
| <b>R20640</b>       | ---                                                                                             | 2.25 | 0.00275 | -1.42 | 0.09416 |

|                 |                                                                                               |      |         |       |         |
|-----------------|-----------------------------------------------------------------------------------------------|------|---------|-------|---------|
| <b>GBP6</b>     | guanylate binding protein family, member 6                                                    | 2.25 | 0.00273 | 1.15  | 0.47    |
| <b>KALRN</b>    | kalirin, RhoGEF kinase                                                                        | 2.26 | 0.01337 | 1.01  | 0.96    |
| <b>C8orf48</b>  | chromosome 8 open reading frame 48                                                            | 2.27 | 0.01136 | -1    | 1.00    |
| <b>SERPINE2</b> | serpin peptidase inhibitor, clade E (nexin, plasminogen activator inhibitor type 1), member 2 | 2.27 | 0.02918 | 1.14  | 0.68    |
| <b>CDKN1C</b>   | cyclin-dependent kinase inhibitor 1C (p57, Kip2)                                              | 2.27 | 0.00873 | 1.01  | 0.98    |
| <b>SERPINA1</b> | serpin peptidase inhibitor, clade A (alpha-1 antiproteinase, antitrypsin), member 1           | 2.27 | 0.00614 | -1    | 1.00    |
| <b>AI936724</b> | ---                                                                                           | 2.27 | 0.00302 | -1.29 | 0.21124 |
| <b>FRMD6</b>    | FERM domain containing 6                                                                      | 2.28 | 0.00078 | 1.19  | 0.28    |
| <b>ST8SIA1</b>  | ST8 alpha-N-acetyl-neuraminide alpha-2,8-sialyltransferase 1                                  | 2.28 | 0.00262 | -1.03 | 0.90    |
| <b>FMO4</b>     | flavin containing monooxygenase 4                                                             | 2.28 | 0.00582 | 1.7   | 0.04    |
| <b>HMGA2</b>    | high mobility group AT-hook 2                                                                 | 2.28 | 0.0189  | -1.17 | 0.58    |
| <b>SHB</b>      | Src homology 2 domain containing adaptor protein B                                            | 2.28 | 0.02295 | -1    | 1.00    |
| <b>ROS1</b>     | c-ros oncogene 1 , receptor tyrosine kinase                                                   | 2.28 | 0.00038 | -1    | 0.99    |
| <b>CYP1A1</b>   | cytochrome P450, family 1, subfamily A, polypeptide 1                                         | 2.29 | 0.0261  | 1.1   | 0.77    |
| <b>MLPH</b>     | melanophilin                                                                                  | 2.29 | 0.0174  | 1.16  | 0.59    |
| <b>SAA4</b>     | serum amyloid A4, constitutive                                                                | 2.30 | 0.00614 | 1.17  | 0.49    |
| <b>ALPK2</b>    | alpha-kinase 2                                                                                | 2.30 | 0.00231 | -1.17 | 0.41    |
| <b>RASD2</b>    | RASD family, member 2                                                                         | 2.30 | 0.00523 | -1.18 | 0.47    |
| <b>CNTNAP3</b>  | contactin associated protein-like 3                                                           | 2.30 | 0.00013 | 1.26  | 0.08    |
| <b>AW189097</b> | ---                                                                                           | 2.30 | 0.01593 | -1.07 | 0.80029 |
| <b>RUNX1</b>    | runt-related transcription factor 1                                                           | 2.30 | 0.00957 | -1.47 | 0.15    |
| <b>TLR2</b>     | toll-like receptor 2                                                                          | 2.30 | 0.02504 | -1.04 | 0.90    |
| <b>MAMDC2</b>   | MAM domain containing 2                                                                       | 2.31 | 0.01338 | 1.15  | 0.61    |
| <b>MAF</b>      | v-maf musculoaponeurotic fibrosarcoma oncogene homolog (avian)                                | 2.31 | 0.01038 | 1.02  | 0.93    |
| <b>N73742</b>   | ---                                                                                           | 2.31 | 0.00379 | 1.13  | 0.54978 |
| <b>LRRC7</b>    | leucine rich repeat containing 7                                                              | 2.31 | 0.02334 | 1.26  | 0.46    |
| <b>LOXL2</b>    | lysyl oxidase-like 2                                                                          | 2.32 | 0.0121  | 1.19  | 0.52    |
| <b>ADM</b>      | adrenomedullin                                                                                | 2.32 | 0.00796 | 1.19  | 0.48    |
| <b>ELF3</b>     | E74-like factor 3 (ets domain transcription factor, epithelial-specific )                     | 2.33 | 0.04535 | -1.03 | 0.94    |
| <b>EPB41L4B</b> | erythrocyte membrane protein band 4.1 like 4B                                                 | 2.33 | 0.00082 | -1    | 0.98    |
| <b>DUSP10</b>   | dual specificity phosphatase 10                                                               | 2.33 | 0.00032 | -1.22 | 0.17    |
| <b>PLA2R1</b>   | phospholipase A2 receptor 1, 180kDa                                                           | 2.33 | 0.00637 | 1.03  | 0.88508 |
| <b>RHBDL2</b>   | rhomboid, veinlet-like 2 (Drosophila)                                                         | 2.33 | 0.00279 | 1     | 0.99    |
| <b>AI223854</b> | ---                                                                                           | 2.34 | 0.00425 | 1.13  | 0.57936 |
| <b>BC040310</b> | ---                                                                                           | 2.34 | 0.00044 | 1.03  | 0.85012 |
| <b>MX1</b>      | myxovirus (influenza virus) resistance 1, interferon-inducible protein p78 (mouse)            | 2.34 | 0.00665 | 1.19  | 0.47    |
| <b>PLAC2</b>    | placenta-specific 2 (non-protein coding)                                                      | 2.34 | 0.00424 | 1.09  | 0.70    |
| <b>ANKRD55</b>  | Ankyrin repeat domain 55                                                                      | 2.34 | 0.03682 | -1.06 | 0.87    |
| <b>BF110268</b> | ---                                                                                           | 2.35 | 0.02002 | 1.01  | 0.9638  |
| <b>UAP1L1</b>   | UDP-N-acteylglucosamine pyrophosphorylase 1-like 1                                            | 2.35 | 0.00283 | -1.15 | 0.49    |
| <b>CAMK2A</b>   | calcium/calmodulin-dependent protein kinase II alpha                                          | 2.35 | 0.00052 | 1     | 0.98    |

|                   |                                                                         |      |          |       |         |
|-------------------|-------------------------------------------------------------------------|------|----------|-------|---------|
| <b>HERC5</b>      | hect domain and RLD 5                                                   | 2.36 | 0.00028  | 1.03  | 0.83    |
| <b>AW292765</b>   | ---                                                                     | 2.37 | 0.00376  | 1.11  | 0.61664 |
| <b>MTMR11</b>     | myotubularin related protein 11                                         | 2.37 | 0.00138  | 1.08  | 0.67    |
| <b>IFITM10</b>    | interferon induced transmembrane protein 10                             | 2.38 | 0.04561  | 1.06  | 0.88    |
| <b>OPTN</b>       | optineurin                                                              | 2.38 | 4.00E-04 | 1.08  | 0.60    |
| <b>CAV1</b>       | caveolin 1, caveolae protein, 22kDa                                     | 2.38 | 0.03554  | -1.02 | 0.96    |
| <b>APOBEC3B</b>   | apolipoprotein B mRNA editing enzyme,<br>catalytic polypeptide-like 3B  | 2.39 | 0.00196  | 1.21  | 0.34    |
| <b>LAMC2</b>      | laminin, gamma 2                                                        | 2.39 | 0.01315  | -1.03 | 0.90    |
| <b>UPP1</b>       | uridine phosphorylase 1                                                 | 2.39 | 0.02813  | -1.04 | 0.90    |
| <b>FTH1</b>       | ferritin, heavy polypeptide 1                                           | 2.39 | 0.00426  | 1.06  | 0.79    |
| <b>BC041915 *</b> | ---                                                                     | 2.41 | 0.00502  | -2.89 | 0.0018  |
| <b>SLIT3</b>      | slit homolog 3 (Drosophila)                                             | 2.41 | 0.00012  | 1.02  | 0.8795  |
| <b>COL5A1</b>     | collagen, type V, alpha 1                                               | 2.41 | 0.00067  | -1.09 | 0.59    |
| <b>DDX60</b>      | DEAD (Asp-Glu-Ala-Asp) box polypeptide 60                               | 2.41 | 0.00374  | 1.16  | 0.50    |
| <b>NMNAT2</b>     | nicotinamide nucleotide adenylyltransferase<br>2                        | 2.41 | 0.01638  | 1.17  | 0.60    |
| <b>ZEB1</b>       | zinc finger E-box binding homeobox 1                                    | 2.41 | 0.0028   | 1.17  | 0.45    |
| <b>TRIM47</b>     | tripartite motif-containing 47                                          | 2.42 | 0.00066  | -1.03 | 0.86    |
| <b>AA702930</b>   | ---                                                                     | 2.43 | 0.02414  | -1.18 | 0.61656 |
| <b>CA442342</b>   | ---                                                                     | 2.43 | 0.00012  | 1.02  | 0.84539 |
| <b>LFNG</b>       | LFNG O-fucosylpeptide 3-beta-N-<br>acetylglucosaminyltransferase        | 2.44 | 0.00201  | -1.08 | 0.70    |
| <b>SLC2A12</b>    | solute carrier family 2 (facilitated glucose<br>transporter), member 12 | 2.44 | 0.00246  | -1.07 | 0.73    |
| <b>IGFBP5</b>     | insulin-like growth factor binding protein 5                            | 2.45 | 0.00098  | 1.69  | 0.02    |
| <b>AF339789</b>   | ---                                                                     | 2.46 | 0.0366   | 1.14  | 0.71273 |
| <b>MMP10</b>      | matrix metalloproteinase 10 (stromelysin 2)                             | 2.46 | 0.01733  | -1.08 | 0.80    |
| <b>TNF</b>        | tumor necrosis factor                                                   | 2.46 | 0.00053  | -1.01 | 0.96    |
| <b>KCND3</b>      | potassium voltage-gated channel, Shal-<br>related subfamily, member 3   | 2.46 | 0.00231  | 1.13  | 0.56    |
| <b>C1orf116</b>   | chromosome 1 open reading frame 116                                     | 2.47 | 0.00197  | 1.01  | 0.97    |
| <b>TGFB1I1</b>    | transforming growth factor beta 1 induced<br>transcript 1               | 2.47 | 0.01473  | 1.02  | 0.96    |
| <b>TFCP2L1</b>    | transcription factor CP2-like 1                                         | 2.47 | 0.00346  | -1.1  | 0.66    |
| <b>KLF7</b>       | Kruppel-like factor 7 (ubiquitous)                                      | 2.47 | 0.00165  | 1.07  | 0.74    |
| <b>LCP1</b>       | lymphocyte cytosolic protein 1 (L-plastin)                              | 2.47 | 0.0248   | -1.42 | 0.31    |
| <b>VGLL3</b>      | vestigial like 3 (Drosophila)                                           | 2.48 | 0.04286  | 1.61  | 0.24    |
| <b>NUAK2</b>      | NUAK family, SNF1-like kinase, 2                                        | 2.49 | 0.00441  | 1.3   | 0.28    |
| <b>CTHRC1</b>     | collagen triple helix repeat containing 1                               | 2.49 | 0.00273  | 1.02  | 0.94    |
| <b>PAX5</b>       | paired box 5                                                            | 2.49 | 6.00E-05 | -1.74 | 0.00    |
| <b>RUNX1-IT1</b>  | RUNX1 intronic transcript 1 (non-protein codir                          | 2.50 | 0.02351  | 1.16  | 0.67    |
| <b>BC020897</b>   | ---                                                                     | 2.50 | 0.01663  | -1.02 | 0.95992 |
| <b>MAN1A1</b>     | mannosidase, alpha, class 1A, member 1                                  | 2.52 | 0.00193  | 1.55  | 0.06    |
| <b>PPAP2B</b>     | phosphatidic acid phosphatase type 2B                                   | 2.52 | 0.01711  | 1.24  | 0.49    |
| <b>SCN3B</b>      | sodium channel, voltage-gated, type III, beta                           | 2.52 | 0.00298  | 1.1   | 0.66    |
| <b>BCL11B</b>     | B-cell CLL/lymphoma 11B (zinc finger protein)                           | 2.52 | 0.00412  | 1.02  | 0.94    |
| <b>GLIS1</b>      | GLIS family zinc finger 1                                               | 2.52 | 0.001    | 1.19  | 0.34    |
| <b>SLC6A20</b>    | solute carrier family 6 (proline IMINO<br>transporter), member 20       | 2.52 | 0.00993  | -1.13 | 0.67    |
| <b>CNPY3</b>      | canopy 3 homolog (zebrafish)                                            | 2.53 | 0.00913  | -1.13 | 0.65    |
| <b>EMP1</b>       | epithelial membrane protein 1                                           | 2.53 | 0.00554  | -1.01 | 0.96    |
| <b>NKAIN4</b>     | Na <sup>+</sup> /K <sup>+</sup> transporting ATPase interacting 4       | 2.54 | 0.00059  | 1.06  | 0.71    |

|                  |                                                                                        |      |          |       |         |
|------------------|----------------------------------------------------------------------------------------|------|----------|-------|---------|
| <b>IL32</b>      | interleukin 32                                                                         | 2.54 | 0.00512  | -1.04 | 0.88    |
| <b>BM873997</b>  | ---                                                                                    | 2.54 | 0.00723  | -1.08 | 0.76795 |
| <b>PROC</b>      | protein C (inactivator of coagulation factors Va and VIIIa)                            | 2.55 | 0.00161  | -1.11 | 0.59    |
| <b>SEMA3E</b>    | sema domain, immunoglobulin domain (Ig), short basic domain, secreted, (semaphorin) 3E | 2.55 | 0.03018  | -1.06 | 0.87    |
| <b>SCN2A</b>     | sodium channel, voltage-gated, type II, alpha subunit                                  | 2.56 | 0.04753  | -1.55 | 0.30    |
| <b>CYP27C1</b>   | cytochrome P450, family 27, subfamily C, polypeptide 1                                 | 2.58 | 0.02897  | 1.02  | 0.95    |
| <b>ARHGEF28</b>  | Rho guanine nucleotide exchange factor (GEF)                                           | 2.58 | 4.00E-05 | -1.05 | 0.66    |
| <b>BF508849</b>  | ---                                                                                    | 2.58 | 0.00127  | -1.02 | 0.93729 |
| <b>CAPN6</b>     | calpain 6                                                                              | 2.59 | 0.00064  | -1.46 | 0.06    |
| <b>PLCE1</b>     | phospholipase C, epsilon 1                                                             | 2.60 | 0.00048  | 1.05  | 0.75    |
| <b>BM992214</b>  | ---                                                                                    | 2.60 | 0.00428  | 1.1   | 0.70284 |
| <b>GULP1</b>     | GULP, engulfment adaptor PTB domain containing 1                                       | 2.60 | 0.00093  | 1.16  | 0.43    |
| <b>TMEM200A</b>  | transmembrane protein 200A                                                             | 2.60 | 0.0012   | 1.07  | 0.72    |
| <b>C10orf10</b>  | chromosome 10 open reading frame 10                                                    | 2.60 | 0.02025  | 1.42  | 0.31    |
| <b>IL16</b>      | interleukin 16 (lymphocyte chemoattractant factor)                                     | 2.60 | 0.00629  | 1.06  | 0.83    |
| <b>W23691</b>    | ---                                                                                    | 2.60 | 0.00139  | -1.07 | 0.73078 |
| <b>ARL4C</b>     | ADP-ribosylation factor-like 4C                                                        | 2.61 | 5.00E-05 | 1.08  | 0.49    |
| <b>TEAD2</b>     | TEA domain family member 2                                                             | 2.61 | 0.01421  | 1.05  | 0.87    |
| <b>CD44</b>      | CD44 molecule (Indian blood group)                                                     | 2.62 | 0.00099  | 1.07  | 0.71    |
| <b>LOXL4</b>     | lysyl oxidase-like 4                                                                   | 2.63 | 0.00381  | 1.04  | 0.86    |
| <b>SYT1</b>      | synaptotagmin I                                                                        | 2.63 | 0.00153  | -1.06 | 0.77    |
| <b>CSF1R</b>     | colony stimulating factor 1 receptor                                                   | 2.63 | 0.00231  | -1.65 | 0.05    |
| <b>HS3ST2</b>    | heparan sulfate (glucosamine) 3-O-sulfotransferase 2                                   | 2.64 | 0.00102  | 1.16  | 0.45    |
| <b>PSG1</b>      | pregnancy specific beta-1-glycoprotein 1                                               | 2.64 | 0.03158  | -1.05 | 0.90    |
| <b>R71596</b>    | ---                                                                                    | 2.64 | 0.00974  | -1.06 | 0.83822 |
| <b>MALL</b>      | mal, T-cell differentiation protein-like                                               | 2.65 | 0.00358  | 1.26  | 0.34    |
| <b>DSG3</b>      | desmoglein 3                                                                           | 2.66 | 7.00E-05 | 1.04  | 0.74    |
| <b>STRA6</b>     | stimulated by retinoic acid gene 6 homolog (mouse)                                     | 2.66 | 0.00108  | 1.08  | 0.68    |
| <b>C20orf160</b> | chromosome 20 open reading frame 160                                                   | 2.66 | 0.0102   | -1.02 | 0.96    |
| <b>LGALS3</b>    | lectin, galactoside-binding, soluble, 3                                                | 2.66 | 0.00032  | 1.02  | 0.90    |
| <b>BC025343</b>  | ---                                                                                    | 2.68 | 0.03919  | -1.15 | 0.73487 |
| <b>CTSS</b>      | cathepsin S                                                                            | 2.70 | 0.00603  | 1.23  | 0.45    |
| <b>C3orf52</b>   | chromosome 3 open reading frame 52                                                     | 2.72 | 0.00756  | -1.06 | 0.8312  |
| <b>NID1</b>      | nidogen 1                                                                              | 2.72 | 0.00362  | -1.15 | 0.57    |
| <b>CORO2B</b>    | coronin, actin binding protein, 2B                                                     | 2.72 | 0.0018   | -1.11 | 0.63    |
| <b>A1245300</b>  | ---                                                                                    | 2.73 | 0.00861  | -1.15 | 0.64071 |
| <b>BF110534</b>  | ---                                                                                    | 2.73 | 1.00E-04 | -1.33 | 0.06382 |
| <b>LURAP1L</b>   | leucine rich adaptor protein 1-like                                                    | 2.73 | 0.00655  | 1.03  | 0.90    |
| <b>MARK1</b>     | MAP/microtubule affinity-regulating kinase 1                                           | 2.74 | 0.00072  | 1.02  | 0.91    |
| <b>KIAA1211L</b> | KIAA1211-like                                                                          | 2.75 | 0.00177  | 1.15  | 0.52    |
| <b>L1CAM</b>     | L1 cell adhesion molecule                                                              | 2.75 | 0.01583  | -1.06 | 0.87    |
| <b>PLK2</b>      | polo-like kinase 2                                                                     | 2.75 | 0.00141  | 1.27  | 0.28    |
| <b>DSC2</b>      | desmocollin 2                                                                          | 2.76 | 0.00066  | 1.23  | 0.29    |
| <b>IVL</b>       | involucrin                                                                             | 2.77 | 7.00E-05 | -1.19 | 0.21    |
| <b>SEC14L2</b>   | SEC14-like 2 ( <i>S. cerevisiae</i> )                                                  | 2.78 | 0.00167  | 1.14  | 0.55    |

|                    |                                                                                                                               |      |          |       |         |
|--------------------|-------------------------------------------------------------------------------------------------------------------------------|------|----------|-------|---------|
| <b>LRRN1</b>       | leucine rich repeat neuronal 1                                                                                                | 2.79 | 8.00E-05 | -1.62 | 0.01    |
| <b>SFN</b>         | stratifin                                                                                                                     | 2.79 | 0.00106  | -1.03 | 0.88    |
| <b>MIAT</b>        | myocardial infarction associated transcript<br>(non-protein coding)                                                           | 2.81 | 0.00368  | -1.06 | 0.81    |
| <b>AI733336</b>    | ---                                                                                                                           | 2.82 | 0.00076  | -1.08 | 0.69344 |
| <b>ZNF365</b>      | zinc finger protein 365                                                                                                       | 2.83 | 0.00018  | -1.02 | 0.88    |
| <b>DAPL1</b>       | death associated protein-like 1                                                                                               | 2.83 | 0.00749  | 1.45  | 0.23    |
| <b>SCN3A</b>       | sodium channel, voltage-gated, type III, alpha<br>subunit                                                                     | 2.84 | 0.02159  | -1.86 | 0.13    |
| <b>SAMD9L</b>      | sterile alpha motif domain containing 9-like                                                                                  | 2.84 | 0.01154  | 1.21  | 0.56    |
| <b>FAM49A</b>      | family with sequence similarity 49, member A                                                                                  | 2.84 | 9.00E-05 | 1.33  | 0.07    |
| <b>KRT6B</b>       | keratin 6B                                                                                                                    | 2.84 | 0.00038  | 1.07  | 0.70    |
| <b>BTBD19</b>      | BTB (POZ) domain containing 19                                                                                                | 2.85 | 0.04713  | 1.16  | 0.74    |
| <b>BC028670</b>    | ---                                                                                                                           | 2.85 | 0.00075  | 1.15  | 0.4797  |
| <b>HDAC9</b>       | histone deacetylase 9                                                                                                         | 2.86 | 0.00363  | 1.28  | 0.35    |
| <b>KRT14</b>       | keratin 14                                                                                                                    | 2.86 | 0.00215  | -1.11 | 0.65    |
| <b>FILIP1L</b>     | filamin A interacting protein 1-like                                                                                          | 2.86 | 0.00308  | 1.08  | 0.77    |
| <b>IFIT2</b>       | interferon-induced protein with<br>tetratricopeptide repeats 2                                                                | 2.86 | 0.00031  | 1.29  | 0.16    |
| <b>AF009316</b>    | ---                                                                                                                           | 2.87 | 0.00383  | -1.31 | 0.32074 |
| <b>TSHZ3</b>       | teashirt zinc finger homeobox 3                                                                                               | 2.88 | 0.00219  | 1.1   | 0.68    |
| <b>DUSP5P</b>      | dual specificity phosphatase 5 pseudogene                                                                                     | 2.89 | 5.00E-04 | -1.07 | 0.71    |
| <b>GPER</b>        | G protein-coupled estrogen receptor 1                                                                                         | 2.89 | 8.00E-05 | 1.08  | 0.56    |
| <b>RSAD2</b>       | radical S-adenosyl methionine domain<br>containing 2                                                                          | 2.90 | 0.00155  | -1.44 | 0.13    |
| <b>UNC5CL</b>      | unc-5 homolog C (C. elegans)-like                                                                                             | 2.90 | 0.00036  | -1.01 | 0.95    |
| <b>AACSP1</b>      | acetoacetyl-CoA synthetase pseudogene 1                                                                                       | 2.91 | 0.00358  | 1.01  | 0.97    |
| <b>GBP2</b>        | guanylate binding protein 2, interferon-<br>inducible                                                                         | 2.91 | 0.01575  | 1.24  | 0.55    |
| <b>PLXDC1</b>      | plexin domain containing 1                                                                                                    | 2.91 | 0.00125  | 1.1   | 0.67    |
| <b>ALDH1A3</b>     | aldehyde dehydrogenase 1 family, member<br>A3                                                                                 | 2.92 | 0.00026  | 1.1   | 0.56    |
| <b>HPGD</b>        | hydroxyprostaglandin dehydrogenase 15-<br>(NAD)                                                                               | 2.92 | 0.0414   | 1.29  | 0.57    |
| <b>TUBA1A</b>      | tubulin, alpha 1a                                                                                                             | 2.94 | 0.00044  | 1.01  | 0.96    |
| <b>THBD</b>        | thrombomodulin                                                                                                                | 2.96 | 0.00033  | 1.02  | 0.92    |
| <b>KCNJ15</b>      | potassium inwardly-rectifying channel,<br>subfamily J, member 15                                                              | 2.97 | 0.00436  | -1.35 | 0.30    |
| <b>STK32A</b>      | serine/threonine kinase 32A                                                                                                   | 2.97 | 0.00116  | 1.06  | 0.80    |
| <b>CLEC7A</b>      | C-type lectin domain family 7, member A                                                                                       | 2.99 | 0.01612  | -1.03 | 0.93    |
| <b>AK026743</b>    | ---                                                                                                                           | 2.99 | 0.01533  | -1.16 | 0.68377 |
| <b>AKR1C1</b>      | aldo-keto reductase family 1, member C1<br>(dihydrodiol dehydrogenase 1; 20-alpha (3-<br>alpha)-hydroxysteroid dehydrogenase) | 3.00 | 0.00137  | -1.03 | 0.91    |
| <b>MAP7D2</b>      | MAP7 domain containing 2                                                                                                      | 3.00 | 3.00E-05 | 1.11  | 0.40    |
| <b>RASSF6</b>      | Ras association (RalGDS/AF-6) domain family<br>member 6                                                                       | 3.01 | 0.00019  | 1.14  | 0.45    |
| <b>CXCL10</b>      | chemokine (C-X-C motif) ligand 10                                                                                             | 3.01 | 0.00484  | -1.04 | 0.88    |
| <b>BLNK</b>        | B-cell linker                                                                                                                 | 3.03 | 0.0093   | 1.02  | 0.96    |
| <b>APCDD1L-AS1</b> | APCDD1L antisense RNA 1                                                                                                       | 3.04 | 0.00017  | -1.37 | 0.08    |
| <b>KRT16</b>       | keratin 16                                                                                                                    | 3.04 | 0.00032  | -1.18 | 0.37    |
| <b>RTTN</b>        | rotatin                                                                                                                       | 3.06 | 0.00032  | -1.05 | 0.79    |



|                  |                                                                                       |      |          |       |         |
|------------------|---------------------------------------------------------------------------------------|------|----------|-------|---------|
| <b>ST6GAL1</b>   | ST6 beta-galactosamide alpha-2,6-sialyltransferase 1                                  | 3.06 | 2.00E-05 | 1.25  | 0.10    |
| <b>AKR1B10</b>   | aldo-keto reductase family 1, member B10 (aldose reductase)                           | 3.06 | 0.00128  | 1.28  | 0.30    |
| <b>UGT1A1</b>    | UDP glucuronosyltransferase 1 family, polypeptide A1                                  | 3.06 | 0.00336  | 1.61  | 0.11    |
| <b>SLAMF7</b>    | SLAM family member 7                                                                  | 3.08 | 3.00E-04 | 1.08  | 0.65    |
| <b>MYLK</b>      | myosin light chain kinase                                                             | 3.09 | 0.00691  | 1.06  | 0.85    |
| <b>TAGLN</b>     | transgelin                                                                            | 3.10 | 0.04019  | 1.26  | 0.62    |
| <b>MERTK</b>     | c-mer proto-oncogene tyrosine kinase                                                  | 3.13 | 0.0346   | 1.13  | 0.79    |
| <b>AF339813</b>  | ---                                                                                   | 3.13 | 0.04392  | -1.88 | 0.21725 |
| <b>TNFAIP3</b>   | tumor necrosis factor, alpha-induced protein 3                                        | 3.13 | 0.00128  | 1.34  | 0.23    |
| <b>NANOS1</b>    | nanos homolog 1 (Drosophila)                                                          | 3.14 | 0.00516  | 1.24  | 0.48061 |
| <b>RIMS2</b>     | regulating synaptic membrane exocytosis 2                                             | 3.15 | 0.00195  | -1.37 | 0.23    |
| <b>SERPINB13</b> | serpin peptidase inhibitor, clade B (ovalbumin), member 13                            | 3.17 | 0.00085  | -1    | 0.99    |
| <b>LPAR5</b>     | lysophosphatidic acid receptor 5                                                      | 3.18 | 6.00E-05 | 1.05  | 0.71    |
| <b>PAMR1</b>     | peptidase domain containing associated with muscle regeneration 1                     | 3.20 | 0.00053  | -1.33 | 0.19    |
| <b>MAFB</b>      | v-maf musculoaponeurotic fibrosarcoma oncogene homolog B (avian)                      | 3.20 | 0.01557  | 1.04  | 0.91    |
| <b>PDZK1</b>     | PDZ domain containing 1                                                               | 3.21 | 0.0207   | -1    | 0.99    |
| <b>ADAM12</b>    | ADAM metallopeptidase domain 12                                                       | 3.22 | 0.00035  | 1.02  | 0.92    |
| <b>TNFSF15</b>   | tumor necrosis factor (ligand) superfamily, member 15                                 | 3.22 | 0.00739  | 1.64  | 0.15862 |
| <b>LRRRC4C</b>   | leucine rich repeat containing 4C                                                     | 3.22 | 0.00111  | -1.81 | 0.03    |
| <b>OAS1</b>      | 2',5'-oligoadenylate synthetase 1, 40/46kDa                                           | 3.25 | 0.00216  | 1.24  | 0.42    |
| <b>BF509371</b>  | ---                                                                                   | 3.26 | 0.00287  | 1.29  | 0.36837 |
| <b>TNFAIP2</b>   | tumor necrosis factor, alpha-induced protein 2                                        | 3.26 | 0.00256  | 1.05  | 0.87    |
| <b>CTSH</b>      | cathepsin H                                                                           | 3.27 | 9.00E-05 | -1.03 | 0.83    |
| <b>PIM1</b>      | pim-1 oncogene                                                                        | 3.29 | 1.00E-05 | 1.05  | 0.67    |
| <b>ATP13A2</b>   | ATPase type 13A2                                                                      | 3.29 | 0.00037  | -1.02 | 0.92    |
| <b>CSF1</b>      | colony stimulating factor 1 (macrophage)                                              | 3.30 | 0.00859  | 1.39  | 0.36    |
| <b>ITGB6</b>     | integrin, beta 6                                                                      | 3.34 | 0.00944  | -1.07 | 0.84    |
| <b>TNFSF10</b>   | tumor necrosis factor (ligand) superfamily, member 10                                 | 3.34 | 0.00567  | 1.14  | 0.69    |
| <b>DLX2</b>      | distal-less homeobox 2                                                                | 3.34 | 0.00143  | 1.27  | 0.35    |
| <b>R83322</b>    | ---                                                                                   | 3.35 | 0.00277  | -1.48 | 0.19026 |
| <b>APCDD1L</b>   | adenomatosis polyposis coli down-regulated 1-like                                     | 3.37 | 7.00E-05 | -1.02 | 0.89    |
| <b>GSTA4</b>     | glutathione S-transferase alpha 4                                                     | 3.38 | 0.00147  | 1.1   | 0.69    |
| <b>MMP9</b>      | matrix metallopeptidase 9 (gelatinase B, 92kDa gelatinase, 92kDa type IV collagenase) | 3.42 | 0.00353  | 1.23  | 0.50    |
| <b>PSG4</b>      | pregnancy specific beta-1-glycoprotein 4                                              | 3.44 | 0.01617  | -1.03 | 0.94    |
| <b>IFIT3</b>     | interferon-induced protein with tetratricopeptide repeats 3                           | 3.45 | 2.00E-05 | 1.23  | 0.13    |
| <b>GPR115</b>    | G protein-coupled receptor 115                                                        | 3.48 | 1.00E-04 | 1.03  | 0.87    |
| <b>AU155234</b>  | ---                                                                                   | 3.50 | 0.00096  | -1.32 | 0.2709  |
| <b>IFIT1</b>     | interferon-induced protein with tetratricopeptide repeats 1                           | 3.50 | 0.00049  | 1.16  | 0.50    |
| <b>PSG7</b>      | pregnancy specific beta-1-glycoprotein 7 (gene/pseudogene)                            | 3.51 | 0.02646  | -1.41 | 0.47    |
| <b>PLAU</b>      | plasminogen activator, urokinase                                                      | 3.55 | 0.00081  | -1.01 | 0.95    |

|                     |                                                                                                                                             |      |          |       |         |
|---------------------|---------------------------------------------------------------------------------------------------------------------------------------------|------|----------|-------|---------|
| <b>AF318340</b>     | ---                                                                                                                                         | 3.57 | 0.00437  | -1.35 | 0.3674  |
| <b>AHNAK2</b>       | AHNAK nucleoprotein 2                                                                                                                       | 3.58 | 0.00281  | 1.04  | 0.89    |
| <b>NRP1</b>         | neuropilin 1                                                                                                                                | 3.61 | 0.01165  | -1.16 | 0.71    |
| <b>SLC47A2</b>      | solute carrier family 47, member 2                                                                                                          | 3.61 | 0.00311  | 1.21  | 0.54    |
| <b>BC033184</b>     | ---                                                                                                                                         | 3.61 | 0.01033  | -1.59 | 0.25325 |
| <b>IGFL1</b>        | IGF-like family member 1                                                                                                                    | 3.62 | 0.00797  | 1.39  | 0.38    |
| <b>VTCN1</b>        | V-set domain containing T cell activation inhibitor 1                                                                                       | 3.62 | 0.00121  | 1.39  | 0.23    |
| <b>OASL</b>         | 2'-5'-oligoadenylate synthetase-like                                                                                                        | 3.66 | 0.00153  | -1    | 0.99    |
| <b>HES2</b>         | hairy and enhancer of split 2 (Drosophila)                                                                                                  | 3.67 | 0.01278  | -1.18 | 0.69    |
| <b>BHLHE41</b>      | basic helix-loop-helix family, member e41                                                                                                   | 3.70 | 0.00104  | -1.09 | 0.75    |
| <b>LOC100506374</b> | uncharacterized LOC100506374                                                                                                                | 3.70 | 0.00108  | 1.2   | 0.48    |
| <b>VSNL1</b>        | visinin-like 1                                                                                                                              | 3.72 | 0.00093  | -1.08 | 0.76    |
| <b>PRLR</b>         | prolactin receptor                                                                                                                          | 3.74 | 0.0016   | 1.08  | 0.79    |
| <b>LY96</b>         | lymphocyte antigen 96                                                                                                                       | 3.83 | 0.00309  | -1.01 | 0.97    |
| <b>SH3RF2</b>       | SH3 domain containing ring finger 2                                                                                                         | 3.83 | 2.00E-05 | 1.05  | 0.76    |
| <b>IFI44L</b>       | interferon-induced protein 44-like                                                                                                          | 3.83 | 0.0069   | -1.17 | 0.67    |
| <b>MFAP2</b>        | microfibrillar-associated protein 2                                                                                                         | 3.87 | 0.00492  | 1.12  | 0.74    |
| <b>TGM5</b>         | transglutaminase 5                                                                                                                          | 3.87 | 0.00299  | 1.1   | 0.77    |
| <b>SEMA5A</b>       | sema domain, seven thrombospondin repeats (type 1 and type 1-like), transmembrane domain (TM) and short cytoplasmic domain, (semaphorin) 5A | 3.87 | 0.00374  | -1.37 | 0.36    |
| <b>RASGRF1</b>      | Ras protein-specific guanine nucleotide-releasing factor 1                                                                                  | 3.88 | 4.00E-05 | -1.01 | 0.97    |
| <b>MX2</b>          | myxovirus (influenza virus) resistance 2 (mouse)                                                                                            | 3.91 | 0        | 1.02  | 0.82    |
| <b>KLK6</b>         | kallikrein-related peptidase 6                                                                                                              | 3.98 | 2.00E-05 | -1.05 | 0.74    |
| <b>SNCAIP</b>       | synuclein, alpha interacting protein                                                                                                        | 4.03 | 0.00597  | -1.15 | 0.71    |
| <b>SLC22A3</b>      | solute carrier family 22 (extraneuronal monoamine transporter), member 3                                                                    | 4.12 | 2.00E-05 | 1.07  | 0.63    |
| <b>CXCL14</b>       | chemokine (C-X-C motif) ligand 14                                                                                                           | 4.13 | 0.0139   | 1.09  | 0.85    |
| <b>ARL14</b>        | ADP-ribosylation factor-like 14                                                                                                             | 4.13 | 0.00047  | -1.25 | 0.37    |
| <b>ERC1</b>         | ELKS/RAB6-interacting/CAST family member 1                                                                                                  | 4.15 | 9.00E-05 | 1.21  | 0.33    |
| <b>MAP2</b>         | microtubule-associated protein 2                                                                                                            | 4.21 | 1.00E-04 | 1.29  | 0.21    |
| <b>ABLIM3</b>       | actin binding LIM protein family, member 3                                                                                                  | 4.23 | 0.00021  | 1.22  | 0.38    |
| <b>MMP28</b>        | matrix metalloproteinase 28                                                                                                                 | 4.23 | 0.00033  | 1.03  | 0.91    |
| <b>HMOX1</b>        | heme oxygenase (decycling) 1                                                                                                                | 4.24 | 0.00012  | 1.05  | 0.82    |
| <b>IGF2BP3</b>      | insulin-like growth factor 2 mRNA binding protein 3                                                                                         | 4.25 | 0.00021  | -1.02 | 0.93    |
| <b>KLK10</b>        | kallikrein-related peptidase 10                                                                                                             | 4.27 | 1.00E-04 | 1.2   | 0.37    |
| <b>EPHA4</b>        | EPH receptor A4                                                                                                                             | 4.30 | 0.00042  | -1.02 | 0.94    |
| <b>WNT5B</b>        | wingless-type MMTV integration site family, member 5B                                                                                       | 4.31 | 2.00E-05 | 1.27  | 0.16    |
| <b>ADTRP</b>        | androgen-dependent TFPI-regulating protein                                                                                                  | 4.37 | 5.00E-05 | 1.23  | 0.28    |
| <b>TCHH</b>         | trichohyalin                                                                                                                                | 4.40 | 1.00E-04 | -1.05 | 0.79    |
| <b>LYPD1</b>        | LY6/PLAUR domain containing 1                                                                                                               | 4.42 | 2.00E-04 | 1.05  | 0.82    |
| <b>P2RY6</b>        | pyrimidinergic receptor P2Y, G-protein coupled, 6                                                                                           | 4.42 | 0        | -1.05 | 0.71    |
| <b>FABP4</b>        | fatty acid binding protein 4, adipocyte                                                                                                     | 4.45 | 0.01837  | 1.49  | 0.45    |
| <b>SLITRK6</b>      | SLIT and NTRK-like family, member 6                                                                                                         | 4.46 | 1.00E-05 | -1.32 | 0.08    |
| <b>SERPINB7</b>     | serpin peptidase inhibitor, clade B (ovalbumin), member 7                                                                                   | 4.54 | 0.01435  | 1.06  | 0.90    |

|                 |                                                                                     |      |          |       |         |
|-----------------|-------------------------------------------------------------------------------------|------|----------|-------|---------|
| <b>C18orf1</b>  | chromosome 18 open reading frame 1                                                  | 4.58 | 0.0013   | 1.08  | 0.81    |
| <b>AI694413</b> | ---                                                                                 | 4.61 | 0.02425  | -1.1  | 0.86638 |
| <b>GPR39</b>    | G protein-coupled receptor 39                                                       | 4.64 | 0.00029  | 1.34  | 0.26    |
| <b>CLCA2</b>    | chloride channel accessory 2                                                        | 4.68 | 0.00369  | 1.08  | 0.83    |
| <b>ABCA1</b>    | ATP-binding cassette, sub-family A (ABC1), member 1                                 | 4.70 | 2.00E-05 | 1.06  | 0.72    |
| <b>MTSS1</b>    | metastasis suppressor 1                                                             | 4.83 | 0.00047  | 1.04  | 0.90    |
| <b>AI819863</b> | ---                                                                                 | 4.87 | 0.00019  | 1.1   | 0.67672 |
| <b>KRT75</b>    | keratin 75                                                                          | 4.93 | 0.00057  | 1.15  | 0.63    |
| <b>NEURL3</b>   | neuralized homolog 3 (Drosophila) pseudogene                                        | 5.03 | 0        | -1.1  | 0.48    |
| <b>CHI3L1</b>   | chitinase 3-like 1 (cartilage glycoprotein-39)                                      | 5.08 | 0.00545  | 1     | 1.00    |
| <b>C4orf26</b>  | chromosome 4 open reading frame 26                                                  | 5.16 | 0        | 1.16  | 0.26    |
| <b>PHEX</b>     | phosphate regulating endopeptidase homolog, X-linked                                | 5.21 | 0.0014   | -1.01 | 0.98    |
| <b>KRT6A</b>    | keratin 6A                                                                          | 5.22 | 4.00E-05 | 1.24  | 0.27    |
| <b>KLK7</b>     | kallikrein-related peptidase 7                                                      | 5.24 | 0.00023  | 1.37  | 0.23    |
| <b>CXCL12</b>   | chemokine (C-X-C motif) ligand 12                                                   | 5.33 | 0.01159  | -1.1  | 0.86    |
| <b>BG010493</b> | ---                                                                                 | 5.34 | 0.002    | -1.08 | 0.84059 |
| <b>SPRR1B</b>   | small proline-rich protein 1B                                                       | 5.39 | 6.00E-05 | 1.01  | 0.98    |
| <b>SPOCD1</b>   | SPOC domain containing 1                                                            | 5.54 | 0.00084  | -1.18 | 0.61    |
| <b>C6orf141</b> | chromosome 6 open reading frame 141                                                 | 5.57 | 0        | 1.01  | 0.96    |
| <b>KRT6C</b>    | keratin 6C                                                                          | 5.58 | 3.00E-05 | -1.09 | 0.65    |
| <b>GBP1</b>     | guanylate binding protein 1, interferon-inducible, 67kDa                            | 5.65 | 6.00E-05 | -1.02 | 0.93    |
| <b>DACT1</b>    | dapper, antagonist of beta-catenin, homolog 1                                       | 5.65 | 0.00065  | 1.89  | 0.07    |
| <b>FBXO32</b>   | F-box protein 32                                                                    | 5.68 | 0.00022  | 1.39  | 0.23    |
| <b>TNC</b>      | tenascin C                                                                          | 5.68 | 9.00E-05 | -1.04 | 0.85    |
| <b>AL389956</b> | ---                                                                                 | 5.70 | 0.00055  | 1.03  | 0.92538 |
| <b>BF244402</b> | ---                                                                                 | 5.75 | 1.00E-05 | 1.74  | 0.00616 |
| <b>SERPINA3</b> | serpin peptidase inhibitor, clade A (alpha-1 antiproteinase, antitrypsin), member 3 | 5.78 | 0.00155  | -1.45 | 0.33    |
| <b>MMP13</b>    | matrix metalloproteinase 13 (collagenase 3)                                         | 5.84 | 0.00162  | -1.14 | 0.72    |
| <b>AI333596</b> | ---                                                                                 | 5.88 | 0.00143  | 1.02  | 0.96015 |
| <b>CST6</b>     | cystatin E/M                                                                        | 5.90 | 1.00E-05 | 1.05  | 0.79    |
| <b>MMP12</b>    | matrix metalloproteinase 12 (macrophage elastase)                                   | 6.06 | 0.00429  | -1.12 | 0.80    |
| <b>TRIM22</b>   | tripartite motif-containing 22                                                      | 6.10 | 8.00E-04 | 1.01  | 0.97    |
| <b>TNFSF11</b>  | tumor necrosis factor (ligand) superfamily, member 11                               | 6.38 | 0.00206  | -1.11 | 0.80    |
| <b>SCN9A</b>    | sodium channel, voltage-gated, type IX, alpha subunit                               | 6.49 | 0        | -1.03 | 0.86    |
| <b>KRT15</b>    | keratin 15                                                                          | 6.65 | 0.00113  | 1.48  | 0.31    |
| <b>IFI44</b>    | Interferon-induced protein 44                                                       | 7.11 | 0.00021  | 1.02  | 0.94    |
| <b>VAV3</b>     | vav 3 guanine nucleotide exchange factor                                            | 7.17 | 0.00034  | 1.22  | 0.53    |
| <b>FLG-AS1</b>  | FLG antisense RNA 1                                                                 | 7.24 | 2.00E-05 | -1.1  | 0.65    |
| <b>KLK5</b>     | kallikrein-related peptidase 5                                                      | 7.66 | 0        | -1.04 | 0.81    |
| <b>GABBR1</b>   | gamma-aminobutyric acid (GABA) B receptor, 1                                        | 7.82 | 0.0038   | 1.14  | 0.80    |
| <b>FYB</b>      | FYN binding protein                                                                 | 8.14 | 0.00032  | 1.22  | 0.56    |
| <b>TSPAN2</b>   | tetraspanin 2                                                                       | 8.66 | 3.00E-05 | 1.18  | 0.50    |
| <b>GRIN2A</b>   | glutamate receptor, ionotropic, N-methyl D-aspartate 2A                             | 9.73 | 6.00E-05 | -1.01 | 0.97    |

|                 |                                                                                               |       |          |       |      |
|-----------------|-----------------------------------------------------------------------------------------------|-------|----------|-------|------|
| <b>MMP1</b>     | matrix metalloproteinase 1 (interstitial collagenase)                                         | 11.48 | 7.00E-05 | -1.5  | 0.22 |
| <b>SERPINE1</b> | serpin peptidase inhibitor, clade E (nexin, plasminogen activator inhibitor type 1), member 1 | 15.77 | 0        | -1.05 | 0.79 |
| <b>GPNMB</b>    | glycoprotein (transmembrane) nmb                                                              | 16.00 | 2.00E-05 | 1.17  | 0.58 |
| <b>KANK4</b>    | KN motif and ankyrin repeat domains 4                                                         | 16.06 | 0        | 1.02  | 0.94 |
| <b>MMP3</b>     | matrix metalloproteinase 3 (stromelysin 1, progelatinase)                                     | 16.38 | 0.00023  | -1.08 | 0.86 |
| <b>CCL2</b>     | chemokine (C-C motif) ligand 2                                                                | 42.02 | 0        | 1.04  | 0.88 |

---

**Table S2. A list of differentially regulated genes affected by CREB depletion in human fusion-positive MEC, but not fusion-negative cells.** The differentially expressed genes after CREB was depleted were identified in both fusion-positive MEC H3118 cells and fusion-negative HSY cells. Those CREB-regulated genes in H3118 cells showing the same regulated direction in fusion-negative HSY were then filtered out. The “positive” and “negative” signs denote up-regulated or down-regulated genes in KD compared to control groups, respectively. The asterisk indicates the common gene in different regulatory direction between HSY and H3118 cells.

| Gene Symbol         | Gene Title                                                                            | Fold change                   | p-value  | Fold change                 | p-value |
|---------------------|---------------------------------------------------------------------------------------|-------------------------------|----------|-----------------------------|---------|
|                     |                                                                                       | CREB<br>KD/Control<br>(H3118) | (H3118)  | CREB<br>KD/Control<br>(HSY) | (HSY)   |
| <b>LOC100288985</b> | Hypothetical protein LOC100288985                                                     | -41.04                        | 8.00E-05 | 1.34                        | 0.63291 |
| <b>STC1</b>         | stanniocalcin 1                                                                       | -26.98                        | 2.00E-05 | 1.07                        | 0.88257 |
| <b>SMOX</b>         | spermine oxidase                                                                      | -21.45                        | 0        | -1.57                       | 0.08883 |
| <b>BCAT1</b>        | branched chain amino-acid transaminase 1, cytosolic                                   | -21.11                        | 1.00E-05 | 1.12                        | 0.7643  |
| <b>DUSP6</b>        | dual specificity phosphatase 6                                                        | -20.44                        | 0        | -1.02                       | 0.9561  |
| <b>AREG</b>         | amphiregulin                                                                          | -18.34                        | 0        | -1.04                       | 0.91531 |
| <b>NGFR</b>         | nerve growth factor receptor                                                          | -16.22                        | 0        | -1.11                       | 0.56875 |
| <b>GPC6</b>         | glypican 6                                                                            | -14.21                        | 0        | 1.13                        | 0.51143 |
| <b>ATP6V0A4</b>     | ATPase, H+ transporting, lysosomal V0 subunit a4                                      | -13.97                        | 0        | 1.02                        | 0.94703 |
| <b>PLAT</b>         | plasminogen activator, tissue                                                         | -13.61                        | 1.00E-05 | -1.35                       | 0.39202 |
| <b>AI093492</b>     | ---                                                                                   | -12.24                        | 0.00023  | -2.44                       | 0.07764 |
| <b>GDF15</b>        | growth differentiation factor 15                                                      | -10.63                        | 0.00361  | -1.47                       | 0.55723 |
| <b>CHST11</b>       | carbohydrate (chondroitin 4) sulfotransferase 11                                      | -10.61                        | 6.00E-05 | -2.02                       | 0.08082 |
| <b>UGT8</b>         | UDP glycosyltransferase 8                                                             | -10.45                        | 1.00E-05 | -1.06                       | 0.83301 |
| <b>IL1B</b>         | interleukin 1, beta                                                                   | -10.32                        | 7.00E-05 | -1.09                       | 0.8173  |
| <b>CDH11</b>        | cadherin 11, type 2, OB-cadherin (osteoblast)                                         | -10.27                        | 0        | -1.32                       | 0.31101 |
| <b>BC027448</b>     | ---                                                                                   | -10.18                        | 0        | 1.04                        | 0.85824 |
| <b>HBEGF</b>        | heparin-binding EGF-like growth factor                                                | -10.15                        | 3.00E-05 | -1.33                       | 0.40938 |
| <b>MFSD2A</b>       | major facilitator superfamily domain containing 2A                                    | -10.08                        | 0        | -1.55                       | 0.12522 |
| <b>LOC100506870</b> | uncharacterized LOC100506870                                                          | -10.04                        | 0.00016  | -1.78                       | 0.17859 |
| <b>STC2</b>         | stanniocalcin 2                                                                       | -9.91                         | 0.01089  | 1.11                        | 0.88649 |
| <b>LIF</b>          | leukemia inhibitory factor                                                            | -9.77                         | 4.00E-05 | -1.16                       | 0.67491 |
| <b>HAL</b>          | histidine ammonia-lyase                                                               | -9.33                         | 0        | 1.16                        | 0.27135 |
| <b>PSAT1</b>        | phosphoserine aminotransferase 1                                                      | -9.13                         | 2.00E-04 | -1.96                       | 0.11804 |
| <b>DMBT1</b>        | deleted in malignant brain tumors 1                                                   | -8.39                         | 5.00E-05 | -1.02                       | 0.95146 |
| <b>CYP24A1</b>      | cytochrome P450, family 24, subfamily A, polypeptide 1                                | -8.31                         | 0.00013  | -1.04                       | 0.92083 |
| <b>CHAC1</b>        | ChaC, cation transport regulator homolog 1 (E. coli)                                  | -8.30                         | 0.0188   | -1.3                        | 0.73814 |
| <b>PNMA2</b>        | paraneoplastic Ma antigen 2                                                           | -8.08                         | 3.00E-05 | 1.11                        | 0.73676 |
| <b>SLCO4A1</b>      | solute carrier organic anion transporter family, member 4A1                           | -7.92                         | 6.00E-05 | -1.01                       | 0.97645 |
| <b>IL11</b>         | interleukin 11                                                                        | -7.62                         | 7.00E-05 | 1.71                        | 0.12442 |
| <b>JAM3</b>         | junctional adhesion molecule 3                                                        | -7.59                         | 0        | -1.14                       | 0.56748 |
| <b>PPP1R3C</b>      | protein phosphatase 1, regulatory subunit 3C                                          | -7.28                         | 1.00E-05 | -1.2                        | 0.49605 |
| <b>HPCAL4</b>       | hippocampal like 4                                                                    | -7.20                         | 0        | -1.22                       | 0.28761 |
| <b>PTGS1</b>        | prostaglandin-endoperoxide synthase 1 (prostaglandin G/H synthase and cyclooxygenase) | -7.16                         | 9.00E-05 | -1.89                       | 0.07106 |
| <b>DHRS2 *</b>      | dehydrogenase/reductase (SDR family) member 2                                         | -7.12                         | 0.00051  | 4.02                        | 0.00531 |
| <b>ELOVL6</b>       | ELOVL fatty acid elongase 6                                                           | -7.06                         | 0        | -1.34                       | 0.16912 |
| <b>CTSL2</b>        | cathepsin L2                                                                          | -6.95                         | 0.00071  | -1.21                       | 0.65159 |

|                     |                                                                                 |       |          |       |         |
|---------------------|---------------------------------------------------------------------------------|-------|----------|-------|---------|
| <b>IL8</b>          | interleukin 8                                                                   | -6.83 | 0        | 1.94  | 0.00775 |
| <b>SERPINB9</b>     | serpin peptidase inhibitor, clade B (ovalbumin), member 9                       | -6.82 | 0        | -1.04 | 0.86809 |
| <b>AREGB</b>        | Amphiregulin B                                                                  | -6.68 | 0        | -1.07 | 0.74896 |
| <b>FOS</b>          | FBJ murine osteosarcoma viral oncogene homolog                                  | -6.66 | 3.00E-05 | -1.51 | 0.16137 |
| <b>AI936034</b>     | ---                                                                             | -6.65 | 6.00E-05 | -1.06 | 0.83556 |
| <b>SERPINB4</b>     | serpin peptidase inhibitor, clade B (ovalbumin), member 4                       | -6.58 | 1.00E-05 | -1.01 | 0.9801  |
| <b>PLAU</b>         | plasminogen activator, urokinase                                                | -6.56 | 0        | -1.04 | 0.81734 |
| <b>ITGA4</b>        | integrin, alpha 4 (antigen CD49D, alpha 4 subunit of VLA-4 receptor)            | -6.51 | 0.00015  | 1.21  | 0.56536 |
| <b>DUSP5</b>        | dual specificity phosphatase 5                                                  | -6.50 | 0        | 1.09  | 0.68515 |
| <b>AGPAT9</b>       | 1-acylglycerol-3-phosphate O-acyltransferase 9                                  | -6.50 | 0.00013  | -1.58 | 0.17957 |
| <b>LOC541471</b>    | uncharacterized LOC541471                                                       | -6.43 | 0        | -1.14 | 0.28764 |
| <b>KLF9</b>         | Kruppel-like factor 9                                                           | -6.30 | 0.00242  | -1.18 | 0.72463 |
| <b>KYNU</b>         | kynureninase                                                                    | -6.23 | 0        | -1.68 | 0.02918 |
| <b>NR4A3</b>        | nuclear receptor subfamily 4, group A, member 3                                 | -6.19 | 3.00E-05 | -1.2  | 0.48638 |
| <b>SPRY4</b>        | sprouty homolog 4 (Drosophila)                                                  | -6.03 | 0        | -1.15 | 0.52646 |
| <b>ABCC3</b>        | ATP-binding cassette, sub-family C (CFTR/MRP), member 3                         | -5.95 | 4.00E-05 | -1.67 | 0.07485 |
| <b>CHL1-AS2</b>     | CHL1 antisense RNA 2 (non-protein coding)                                       | -5.91 | 2.00E-05 | -1.23 | 0.405   |
| <b>HIST1H3A</b>     | histone cluster 1, H3a                                                          | -5.89 | 9.00E-05 | -1.94 | 0.04225 |
| <b>DESI1</b>        | desumoylating isopeptidase 1                                                    | -5.86 | 5.00E-04 | -3.64 | 0.00435 |
| <b>KIF21B</b>       | kinesin family member 21B                                                       | -5.83 | 1.00E-04 | -1.36 | 0.3111  |
| <b>KCNQ5</b>        | potassium voltage-gated channel, KQT-like subfamily, member 5                   | -5.82 | 0        | 1.06  | 0.71397 |
| <b>CA12</b>         | carbonic anhydrase XII                                                          | -5.81 | 0.00027  | 1.15  | 0.67697 |
| <b>TIMP1</b>        | TIMP metalloproteinase inhibitor 1                                              | -5.76 | 0.00025  | -1.79 | 0.10017 |
| <b>SH3GL3</b>       | SH3-domain GRB2-like 3                                                          | -5.76 | 0.00054  | 1.16  | 0.68034 |
| <b>AL049245</b>     | ---                                                                             | -5.75 | 0        | -1.05 | 0.7761  |
| <b>PCOLCE2</b>      | procollagen C-endopeptidase enhancer 2                                          | -5.72 | 0        | 1.08  | 0.70474 |
| <b>IL1A</b>         | interleukin 1, alpha                                                            | -5.65 | 4.00E-05 | 1.14  | 0.62626 |
| <b>F2RL2</b>        | coagulation factor II (thrombin) receptor-like 2                                | -5.63 | 0.00428  | 1.59  | 0.35014 |
| <b>TGM2</b>         | transglutaminase 2 (C polypeptide, protein-glutamine-gamma-glutamyltransferase) | -5.62 | 0.00027  | 1.13  | 0.70417 |
| <b>SPP1</b>         | secreted phosphoprotein 1                                                       | -5.59 | 0.00028  | 1.03  | 0.93498 |
| <b>ANO3</b>         | anoctamin 3                                                                     | -5.59 | 0        | -1.5  | 0.05304 |
| <b>LOC100653010</b> | uncharacterized LOC100653010                                                    | -5.58 | 0.02428  | -1.45 | 0.57858 |
| <b>FSTL1</b>        | follistatin-like 1                                                              | -5.57 | 1.00E-05 | -1.81 | 0.01931 |
| <b>CBLC</b>         | Cbl proto-oncogene, E3 ubiquitin protein ligase C                               | -5.55 | 1.00E-05 | -1.19 | 0.41841 |
| <b>IGFBP7</b>       | insulin-like growth factor binding protein 7                                    | -5.48 | 0        | -1.54 | 0.02086 |
| <b>CDC45</b>        | cell division cycle 45 homolog (S. cerevisiae)                                  | -5.43 | 0.00073  | -1.18 | 0.65399 |
| <b>FAM101B</b>      | family with sequence similarity 101, member B                                   | -5.41 | 0.00092  | 1.34  | 0.44382 |
| <b>SAA1</b>         | serum amyloid A1                                                                | -5.34 | 0.00149  | -1.38 | 0.4275  |
| <b>PECAM1</b>       | platelet/endothelial cell adhesion molecule 1                                   | -5.33 | 8.00E-05 | -1.25 | 0.41692 |
| <b>KIF15</b>        | kinesin family member 15                                                        | -5.23 | 0.00205  | -1.55 | 0.30368 |
| <b>DUSP4</b>        | dual specificity phosphatase 4                                                  | -5.23 | 0        | -1.31 | 0.11602 |
| <b>SKA3</b>         | spindle and kinetochore associated complex subunit 3                            | -5.22 | 0.00665  | -1.4  | 0.50876 |
| <b>TRIB3</b>        | tribbles homolog 3 (Drosophila)                                                 | -5.20 | 0.02592  | -1.29 | 0.69487 |
| <b>CTGF</b>         | connective tissue growth factor                                                 | -5.16 | 2.00E-05 | -1.18 | 0.49192 |
| <b>BU955063</b>     | ---                                                                             | -5.15 | 2.00E-04 | 1.01  | 0.97263 |

|                     |                                                                                                  |       |          |       |         |
|---------------------|--------------------------------------------------------------------------------------------------|-------|----------|-------|---------|
| <b>FARP1</b>        | FERM, RhoGEF (ARHGEF) and pleckstrin domain protein 1 (chondrocyte-derived)                      | -5.11 | 0        | -1.4  | 0.09444 |
| <b>FAM216A</b>      | family with sequence similarity 216, member A                                                    | -5.08 | 0.00011  | -1.73 | 0.06788 |
| <b>HTRA3</b>        | HtrA serine peptidase 3                                                                          | -5.05 | 0        | -1.2  | 0.30938 |
| <b>TSPAN12</b>      | tetraspanin 12                                                                                   | -5.05 | 0.01751  | -2.85 | 0.09684 |
| <b>MELK</b>         | maternal embryonic leucine zipper kinase                                                         | -5.04 | 0.00751  | -1.11 | 0.83668 |
| <b>COL4A1</b>       | collagen, type IV, alpha 1                                                                       | -5.01 | 2.00E-05 | -1.13 | 0.58963 |
| <b>FGF2</b>         | fibroblast growth factor 2 (basic)                                                               | -4.96 | 5.00E-05 | 1.1   | 0.70631 |
| <b>RASD1</b>        | RAS, dexamethasone-induced 1                                                                     | -4.96 | 2.00E-05 | 1.05  | 0.8222  |
| <b>SLC9A7</b>       | solute carrier family 9, subfamily A (NHE7, cation proton antiporter 7), member 7                | -4.92 | 0.00171  | -1.03 | 0.94709 |
| <b>BC043357</b>     | ---                                                                                              | -4.87 | 6.00E-05 | -1.05 | 0.85858 |
| <b>SERPINA3</b>     | serpin peptidase inhibitor, clade A (alpha-1 antiproteinase, antitrypsin), member 3              | -4.85 | 8.00E-04 | -1.05 | 0.88585 |
| <b>SFRP1</b>        | secreted frizzled-related protein 1                                                              | -4.85 | 4.00E-05 | -1.18 | 0.49084 |
| <b>SYT12</b>        | synaptotagmin XII                                                                                | -4.85 | 1.00E-05 | -1.3  | 0.21144 |
| <b>TMCC3</b>        | transmembrane and coiled-coil domain family 3                                                    | -4.85 | 0.00034  | -1.71 | 0.10433 |
| <b>EXO1</b>         | exonuclease 1                                                                                    | -4.83 | 4.00E-05 | -1.08 | 0.75247 |
| <b>KCNG1</b>        | potassium voltage-gated channel, subfamily G, member 1                                           | -4.82 | 1.00E-05 | -1.1  | 0.65882 |
| <b>SLC1A4</b>       | solute carrier family 1 (glutamate/neutral amino acid transporter), member 4                     | -4.81 | 0.00034  | -1.22 | 0.52294 |
| <b>CENPQ</b>        | centromere protein Q                                                                             | -4.80 | 0.00204  | -1.59 | 0.25458 |
| <b>PAQR5</b>        | progesterin and adipoQ receptor family member V                                                  | -4.77 | 7.00E-05 | 1.25  | 0.39312 |
| <b>TGFB2</b>        | transforming growth factor, beta 2                                                               | -4.76 | 0.00034  | -1.21 | 0.53776 |
| <b>CKAP2L</b>       | cytoskeleton associated protein 2-like                                                           | -4.74 | 0.00111  | -1.49 | 0.27735 |
| <b>LRP8</b>         | low density lipoprotein receptor-related protein 8, apolipoprotein e receptor                    | -4.73 | 0.00032  | 1.27  | 0.43833 |
| <b>SPRY2</b>        | sprouty homolog 2 (Drosophila)                                                                   | -4.67 | 0.00054  | -1.17 | 0.61829 |
| <b>CSGALNACT1</b>   | chondroitin sulfate N-acetylgalactosaminyltransferase 1                                          | -4.67 | 0.00032  | 1.21  | 0.5261  |
| <b>MICAL2</b>       | microtubule associated monooxygenase, calponin and LIM domain containing 2                       | -4.65 | 0.0036   | 1.05  | 0.90275 |
| <b>SERPINA1</b>     | serpin peptidase inhibitor, clade A (alpha-1 antiproteinase, antitrypsin), member 1              | -4.65 | 0.00044  | -1.07 | 0.83686 |
| <b>SLC9A1</b>       | solute carrier family 9, subfamily A (NHE1, cation proton antiporter 1), member 1                | -4.65 | 1.00E-05 | -1.75 | 0.01078 |
| <b>LOC100507307</b> | uncharacterized LOC100507307                                                                     | -4.63 | 0        | -1.47 | 0.05153 |
| <b>PLEK2</b>        | pleckstrin 2                                                                                     | -4.60 | 0.00022  | 1.47  | 0.19332 |
| <b>ABCA12</b>       | ATP-binding cassette, sub-family A (ABC1), member 12                                             | -4.59 | 0.00018  | -1.13 | 0.65965 |
| <b>MIR17HG</b>      | MIR17 host gene (non-protein coding)                                                             | -4.59 | 3.00E-05 | -1.95 | 0.01178 |
| <b>IL27RA</b>       | interleukin 27 receptor, alpha                                                                   | -4.54 | 0.00111  | 1.15  | 0.6816  |
| <b>KCNK5</b>        | potassium channel, subfamily K, member 5                                                         | -4.54 | 0.00062  | -1.41 | 0.29856 |
| <b>C11orf82</b>     | chromosome 11 open reading frame 82                                                              | -4.53 | 0.00019  | -1.39 | 0.25196 |
| <b>IL20</b>         | interleukin 20                                                                                   | -4.53 | 0.0017   | -1.1  | 0.7965  |
| <b>ADORA2B</b>      | adenosine A2b receptor                                                                           | -4.52 | 8.00E-05 | -1.07 | 0.77319 |
| <b>CLGN</b>         | calmegin                                                                                         | -4.51 | 0.00913  | 1.02  | 0.97307 |
| <b>CLDN10</b>       | claudin 10                                                                                       | -4.50 | 0        | -1.01 | 0.96027 |
| <b>SGTB</b>         | small glutamine-rich tetratricopeptide repeat (TPR)-containing, beta                             | -4.50 | 1.00E-05 | -1.32 | 0.16415 |
| <b>GALNT12</b>      | UDP-N-acetyl-alpha-D-galactosamine:polypeptide N-acetylgalactosaminyltransferase 12 (GalNac-T12) | -4.47 | 8.00E-05 | -1.85 | 0.02656 |

|                 |                                                                            |       |          |       |         |
|-----------------|----------------------------------------------------------------------------|-------|----------|-------|---------|
| <b>GRAMD1B</b>  | GRAM domain containing 1B                                                  | -4.47 | 5.00E-05 | 1.26  | 0.33164 |
| <b>CTH *</b>    | cystathionase (cystathionine gamma-lyase)                                  | -4.45 | 0.00113  | 2.38  | 0.0172  |
| <b>MCM6</b>     | minichromosome maintenance complex component 6                             | -4.45 | 0.00083  | -1.08 | 0.81474 |
| <b>MKI67</b>    | antigen identified by monoclonal antibody Ki-67                            | -4.45 | 0.00115  | -1.5  | 0.25198 |
| <b>BC015429</b> | ---                                                                        | -4.39 | 0.00034  | -1.07 | 0.82733 |
| <b>PTPRE</b>    | protein tyrosine phosphatase, receptor type, E                             | -4.38 | 1.00E-05 | -1.23 | 0.2796  |
| <b>SLC39A8</b>  | solute carrier family 39 (zinc transporter), member 8                      | -4.36 | 7.00E-05 | -1.68 | 0.04818 |
| <b>C11orf86</b> | chromosome 11 open reading frame 86                                        | -4.34 | 0.00013  | 1.03  | 0.89948 |
| <b>ADAM23</b>   | ADAM metallopeptidase domain 23                                            | -4.34 | 0.00016  | 1.18  | 0.53925 |
| <b>ASF1B</b>    | ASF1 anti-silencing function 1 homolog B ( <i>S. cerevisiae</i> )          | -4.33 | 0.0113   | 1.37  | 0.52752 |
| <b>RMI2</b>     | RMI2, RecQ mediated genome instability 2, homolog ( <i>S. cerevisiae</i> ) | -4.33 | 0.00544  | -1.02 | 0.95803 |
| <b>STEAP4</b>   | STEAP family member 4                                                      | -4.27 | 0.00091  | -1.99 | 0.0536  |
| <b>BEND6</b>    | BEN domain containing 6                                                    | -4.27 | 2.00E-05 | -1.42 | 0.10304 |
| <b>DEPDC1</b>   | DEP domain containing 1                                                    | -4.25 | 0.01146  | -1.33 | 0.55778 |
| <b>ZNF697</b>   | zinc finger protein 697                                                    | -4.24 | 0.00231  | -1.46 | 0.31807 |
| <b>SORBS2</b>   | sorbin and SH3 domain containing 2                                         | -4.23 | 0.00779  | -1.05 | 0.91115 |
| <b>SLC2A3</b>   | solute carrier family 2 (facilitated glucose transporter), member 3        | -4.22 | 0.00034  | 1.45  | 0.20854 |
| <b>TPRG1</b>    | tumor protein p63 regulated 1                                              | -4.22 | 0.00033  | 1.2   | 0.51485 |
| <b>PHF20L1</b>  | PHD finger protein 20-like 1                                               | -4.19 | 0.01178  | -1.7  | 0.28264 |
| <b>HIST1H1D</b> | histone cluster 1, H1d                                                     | -4.18 | 0        | -1.07 | 0.67885 |
| <b>PHGDH</b>    | phosphoglycerate dehydrogenase                                             | -4.18 | 0.00044  | 1.06  | 0.83981 |
| <b>DLGAP5</b>   | discs, large ( <i>Drosophila</i> ) homolog-associated protein 5            | -4.17 | 0.02027  | -1.76 | 0.30433 |
| <b>GJA3</b>     | gap junction protein, alpha 3, 46kDa                                       | -4.17 | 0.01423  | -1.11 | 0.83517 |
| <b>CHSY3</b>    | chondroitin sulfate synthase 3                                             | -4.16 | 0.00028  | -1.13 | 0.65437 |
| <b>LUM</b>      | lumican                                                                    | -4.16 | 0.03358  | -1.33 | 0.63405 |
| <b>MND1</b>     | meiotic nuclear divisions 1 homolog ( <i>S. cerevisiae</i> )               | -4.16 | 1.00E-05 | -1.35 | 0.11375 |
| <b>TRAF5</b>    | TNF receptor-associated factor 5                                           | -4.14 | 0        | 1.62  | 0.00257 |
| <b>HOXD-AS1</b> | HOXD cluster antisense RNA 1 (non-protein coding)                          | -4.14 | 0.00449  | -2.62 | 0.03358 |
| <b>XPR1</b>     | xenotropic and polytropic retrovirus receptor 1                            | -4.14 | 0.00657  | -1.47 | 0.37781 |
| <b>LAPTM5</b>   | lysosomal protein transmembrane 5                                          | -4.14 | 0        | -1.03 | 0.80679 |
| <b>BCL3</b>     | B-cell CLL/lymphoma 3                                                      | -4.12 | 1.00E-05 | -1.06 | 0.72639 |
| <b>FNDC3B</b>   | fibronectin type III domain containing 3B                                  | -4.12 | 0.00773  | -1.92 | 0.15967 |
| <b>GPT2</b>     | glutamic pyruvate transaminase (alanine aminotransferase) 2                | -4.10 | 0.00012  | -1.01 | 0.95903 |
| <b>ERRFI1</b>   | ERBB receptor feedback inhibitor 1                                         | -4.08 | 1.00E-04 | -1.84 | 0.02463 |
| <b>CDT1</b>     | Chromatin licensing and DNA replication factor 1                           | -4.08 | 0.02336  | -1.17 | 0.76838 |
| <b>EGR1</b>     | early growth response 1                                                    | -4.08 | 1.00E-05 | -2.26 | 0.00114 |
| <b>DKK1</b>     | dickkopf 1 homolog ( <i>Xenopus laevis</i> )                               | -4.06 | 0.00966  | -1.56 | 0.33531 |
| <b>AA938184</b> | ---                                                                        | -4.06 | 0.02191  | 1.07  | 0.90576 |
| <b>BF590917</b> | ---                                                                        | -4.06 | 1.00E-04 | 1.02  | 0.9321  |
| <b>UBE2V2</b>   | ubiquitin-conjugating enzyme E2 variant 2                                  | -4.05 | 0.00781  | -3.57 | 0.01315 |
| <b>ALDH1A3</b>  | aldehyde dehydrogenase 1 family, member A3                                 | -4.04 | 0.00105  | -1.29 | 0.4377  |
| <b>SLCO2A1</b>  | solute carrier organic anion transporter family, member 2A1                | -4.04 | 0.00095  | -1.35 | 0.34924 |
| <b>CDCA7</b>    | cell division cycle associated 7                                           | -4.03 | 0.00118  | -1.11 | 0.738   |
| <b>RNF165</b>   | ring finger protein 165                                                    | -4.02 | 1.00E-05 | -1.76 | 0.01058 |



|                     |                                                                                        |       |          |       |         |
|---------------------|----------------------------------------------------------------------------------------|-------|----------|-------|---------|
| <b>FOSL1</b>        | FOS-like antigen 1                                                                     | -4.01 | 0.00018  | -1.26 | 0.36281 |
| <b>PSRC1</b>        | proline/serine-rich coiled-coil 1                                                      | -4.01 | 0.00592  | -2.11 | 0.0922  |
| <b>IER3</b>         | immediate early response 3                                                             | -4.00 | 0        | -1.1  | 0.55523 |
| <b>MAP1B</b>        | microtubule-associated protein 1B                                                      | -4.00 | 0.00822  | 1.16  | 0.73494 |
| <b>VLDLR</b>        | very low density lipoprotein receptor                                                  | -3.99 | 0.00422  | -1    | 0.99744 |
| <b>DLGAP1-AS2</b>   | DLGAP1 antisense RNA 2                                                                 | -3.99 | 9.00E-05 | -1.57 | 0.06964 |
| <b>AI926924</b>     | ---                                                                                    | -3.93 | 0.01003  | -1.46 | 0.40675 |
| <b>ZNF239</b>       | zinc finger protein 239                                                                | -3.92 | 0.00015  | -1.19 | 0.48845 |
| <b>JPH1</b>         | junctophilin 1                                                                         | -3.92 | 0.0011   | 1.25  | 0.48168 |
| <b>CHRM3</b>        | cholinergic receptor, muscarinic 3                                                     | -3.92 | 0.00085  | -1.07 | 0.83136 |
| <b>BLMH</b>         | bleomycin hydrolase                                                                    | -3.91 | 1.00E-04 | -1.29 | 0.27753 |
| <b>SH3KBP1</b>      | SH3-domain kinase binding protein 1                                                    | -3.90 | 0.00018  | -1.27 | 0.34487 |
| <b>SHISA2</b>       | shisa homolog 2 ( <i>Xenopus laevis</i> )                                              | -3.89 | 0.00035  | 1.14  | 0.61964 |
| <b>KLHL8</b>        | kelch-like 8 ( <i>Drosophila</i> )                                                     | -3.89 | 0.00637  | -2.16 | 0.0815  |
| <b>MAP3K9</b>       | mitogen-activated protein kinase kinase kinase 9                                       | -3.88 | 1.00E-04 | 1.02  | 0.93607 |
| <b>MARC1</b>        | mitochondrial amidoxime reducing component 1                                           | -3.88 | 0.00127  | -1.15 | 0.66513 |
| <b>FYN</b>          | FYN oncogene related to SRC, FGR, YES                                                  | -3.87 | 0.00025  | -1.11 | 0.69561 |
| <b>NR4A2 *</b>      | nuclear receptor subfamily 4, group A, member 2                                        | -3.86 | 0.00041  | 2.17  | 0.01446 |
| <b>SLC29A1</b>      | solute carrier family 29 (nucleoside transporters), member 1                           | -3.85 | 0.00018  | 1.09  | 0.72033 |
| <b>TNFRSF12A</b>    | tumor necrosis factor receptor superfamily, member 12A                                 | -3.85 | 0.00162  | -1.35 | 0.36653 |
| <b>AI743753</b>     | ---                                                                                    | -3.85 | 0.00102  | -1.93 | 0.05111 |
| <b>GLB1L2</b>       | galactosidase, beta 1-like 2                                                           | -3.83 | 0.00101  | -1.26 | 0.45423 |
| <b>EIF4EBP1</b>     | eukaryotic translation initiation factor 4E binding protein 1                          | -3.83 | 0.00085  | -1.17 | 0.59764 |
| <b>RAD51AP1</b>     | RAD51 associated protein 1                                                             | -3.82 | 0.03328  | 1.17  | 0.77625 |
| <b>NTN4</b>         | netrin 4                                                                               | -3.82 | 0.001    | -1.95 | 0.04646 |
| <b>GEM</b>          | GTP binding protein overexpressed in skeletal muscle                                   | -3.82 | 0.00416  | -1.02 | 0.94967 |
| <b>TRPA1</b>        | transient receptor potential cation channel, subfamily A, member 1                     | -3.81 | 0.0023   | -1.08 | 0.81279 |
| <b>PALD1</b>        | phosphatase domain containing, paladin 1                                               | -3.81 | 3.00E-05 | 1.2   | 0.34561 |
| <b>PGF</b>          | placental growth factor                                                                | -3.81 | 0.00459  | -1.13 | 0.74268 |
| <b>BQ024490</b>     | ---                                                                                    | -3.80 | 0.00026  | -1.14 | 0.60793 |
| <b>FAM132B</b>      | family with sequence similarity 132, member B                                          | -3.79 | 0.00015  | -1.03 | 0.89889 |
| <b>SEMA3G</b>       | sema domain, immunoglobulin domain (Ig), short basic domain, secreted, (semaphorin) 3G | -3.79 | 0.00491  | 1.06  | 0.8723  |
| <b>CDCA5</b>        | cell division cycle associated 5                                                       | -3.78 | 0.04824  | -1.29 | 0.67428 |
| <b>LAMA1</b>        | laminin, alpha 1                                                                       | -3.78 | 7.00E-05 | 1.06  | 0.7756  |
| <b>CHST6</b>        | carbohydrate (N-acetylglucosamine 6-O) sulfotransferase 6                              | -3.75 | 0.00028  | -1.61 | 0.08158 |
| <b>ZNF331</b>       | zinc finger protein 331                                                                | -3.73 | 1.00E-05 | -1.04 | 0.79857 |
| <b>PRKCH</b>        | protein kinase C, eta                                                                  | -3.73 | 0.00024  | 1.22  | 0.42117 |
| <b>LPAR3</b>        | lysophosphatidic acid receptor 3                                                       | -3.71 | 1.00E-05 | -1.1  | 0.54784 |
| <b>LOC100507564</b> | uncharacterized LOC100507564                                                           | -3.70 | 0.00018  | 1.13  | 0.59692 |
| <b>SARS</b>         | seryl-tRNA synthetase                                                                  | -3.69 | 0.00314  | -1.13 | 0.72791 |
| <b>ARL13B</b>       | ADP-ribosylation factor-like 13B                                                       | -3.68 | 0.0106   | -1.72 | 0.22489 |
| <b>CTNNA1</b>       | catenin (cadherin-associated protein), alpha-like 1                                    | -3.68 | 0.0018   | 1.21  | 0.55403 |
| <b>E2F8</b>         | E2F transcription factor 8                                                             | -3.68 | 0.00376  | -1.04 | 0.91717 |
| <b>NID2</b>         | nidogen 2 (osteonidogen)                                                               | -3.68 | 0.00591  | 1     | 0.99963 |
| <b>NOG</b>          | noggin                                                                                 | -3.67 | 0.00015  | -1.27 | 0.31226 |
| <b>PRKAR2B</b>      | protein kinase, cAMP-dependent, regulatory, type II, beta                              | -3.67 | 0.02668  | 1.46  | 0.47116 |
| <b>UBASH3B</b>      | ubiquitin associated and SH3 domain containing B                                       | -3.66 | 3.00E-05 | 1.44  | 0.07612 |

|                     |                                                                                             |       |          |       |         |
|---------------------|---------------------------------------------------------------------------------------------|-------|----------|-------|---------|
| <b>PBK</b>          | PDZ binding kinase                                                                          | -3.65 | 0.03004  | -1.15 | 0.79546 |
| <b>LGSN</b>         | lengsin, lens protein with glutamine synthetase domain                                      | -3.65 | 0.02779  | 1.01  | 0.98181 |
| <b>DEPDC1B</b>      | DEP domain containing 1B                                                                    | -3.65 | 0.02583  | -1.3  | 0.60783 |
| <b>LOC100506918</b> | hypothetical LOC100506918                                                                   | -3.63 | 0.00107  | -1.82 | 0.06307 |
| <b>SPAG4</b>        | sperm associated antigen 4                                                                  | -3.62 | 0.00425  | -1.03 | 0.92528 |
| <b>TCF19</b>        | transcription factor 19                                                                     | -3.62 | 0.017    | 1.17  | 0.73299 |
| <b>EGF</b>          | epidermal growth factor                                                                     | -3.62 | 4.00E-05 | -1.42 | 0.08946 |
| <b>NUF2</b>         | NUF2, NDC80 kinetochore complex component, homolog ( <i>S. cerevisiae</i> )                 | -3.61 | 0.0157   | -1.3  | 0.57088 |
| <b>OSMR</b>         | oncostatin M receptor                                                                       | -3.60 | 0.00092  | -1.21 | 0.50367 |
| <b>LINC00473</b>    | long intergenic non-protein coding RNA 473                                                  | -3.60 | 6.00E-05 | -1.51 | 0.06267 |
| <b>STK32C</b>       | serine/threonine kinase 32C                                                                 | -3.60 | 0.00125  | -1.6  | 0.13821 |
| <b>MCM10</b>        | minichromosome maintenance complex component 10                                             | -3.59 | 8.00E-05 | -1.67 | 0.02965 |
| <b>BG054960</b>     | ---                                                                                         | -3.59 | 0.00026  | -1.39 | 0.19663 |
| <b>LYPD6B</b>       | LY6/PLAUR domain containing 6B                                                              | -3.58 | 1.00E-05 | 1.23  | 0.19594 |
| <b>MTHFD1L</b>      | methylenetetrahydrofolate dehydrogenase (NADP+ dependent) 1-like                            | -3.57 | 7.00E-05 | -1.07 | 0.74611 |
| <b>DNASE1L3</b>     | deoxyribonuclease I-like 3                                                                  | -3.56 | 0.00101  | -1.37 | 0.29023 |
| <b>A1806183</b>     | ---                                                                                         | -3.55 | 0.00021  | 1.05  | 0.8325  |
| <b>CCNYL1</b>       | cyclin Y-like 1                                                                             | -3.54 | 0.00777  | -1.03 | 0.93456 |
| <b>SLC7A11</b>      | solute carrier family 7 (anionic amino acid transporter light chain, xc- system), member 11 | -3.54 | 0.00907  | 1.06  | 0.88323 |
| <b>KIAA1644</b>     | KIAA1644                                                                                    | -3.53 | 1.00E-05 | -1.33 | 0.08499 |
| <b>SH3PXD2B</b>     | SH3 and PX domains 2B                                                                       | -3.52 | 0.00383  | 1.43  | 0.31562 |
| <b>UBE2C</b>        | ubiquitin-conjugating enzyme E2C                                                            | -3.51 | 0.00696  | -1.63 | 0.22187 |
| <b>S100A9</b>       | S100 calcium binding protein A9                                                             | -3.51 | 0.00015  | -1.11 | 0.63018 |
| <b>BF590850</b>     | ---                                                                                         | -3.50 | 0.00171  | -1.23 | 0.50862 |
| <b>FAS</b>          | Fas (TNF receptor superfamily, member 6)                                                    | -3.50 | 0.00021  | -1.17 | 0.51164 |
| <b>NEIL3</b>        | nei endonuclease VIII-like 3 ( <i>E. coli</i> )                                             | -3.50 | 4.00E-04 | -1.69 | 0.05716 |
| <b>SAA2</b>         | serum amyloid A2                                                                            | -3.49 | 8.00E-05 | -1.76 | 0.01761 |
| <b>LEPROTL1</b>     | leptin receptor overlapping transcript-like 1                                               | -3.49 | 0        | -1.14 | 0.36824 |
| <b>SMC2</b>         | structural maintenance of chromosomes 2                                                     | -3.49 | 0.0155   | 1.09  | 0.85304 |
| <b>MGC20647</b>     | uncharacterized protein MGC20647                                                            | -3.48 | 7.00E-05 | -1.18 | 0.41407 |
| <b>AKAP12</b>       | A kinase (PRKA) anchor protein 12                                                           | -3.48 | 0        | 1.41  | 0.03918 |
| <b>NCAM1</b>        | neural cell adhesion molecule 1                                                             | -3.48 | 0.00082  | 1.06  | 0.823   |
| <b>AURKB</b>        | aurora kinase B                                                                             | -3.47 | 0.02316  | -1.42 | 0.47211 |
| <b>SSH1</b>         | slingshot homolog 1 ( <i>Drosophila</i> )                                                   | -3.47 | 0.00743  | 1.13  | 0.74807 |
| <b>NCAPH</b>        | non-SMC condensin I complex, subunit H                                                      | -3.47 | 0.03792  | -1.47 | 0.47798 |
| <b>SPDL1</b>        | spindle apparatus coiled-coil protein 1                                                     | -3.45 | 0.00167  | -1.41 | 0.27314 |
| <b>BG112263</b>     | ---                                                                                         | -3.45 | 1.00E-04 | -1.52 | 0.06324 |
| <b>RAB3B</b>        | RAB3B, member RAS oncogene family                                                           | -3.43 | 0.00945  | 1     | 0.99046 |
| <b>IL24</b>         | interleukin 24                                                                              | -3.43 | 0.04046  | 1.31  | 0.6167  |
| <b>ABCC4</b>        | ATP-binding cassette, sub-family C (CFTR/MRP), member 4                                     | -3.42 | 0.00018  | -1.19 | 0.44815 |
| <b>CXCL2</b>        | chemokine (C-X-C motif) ligand 2                                                            | -3.41 | 0.0041   | -1.58 | 0.2029  |
| <b>SPC25</b>        | SPC25, NDC80 kinetochore complex component, homolog ( <i>S. cerevisiae</i> )                | -3.41 | 0.00082  | -1.42 | 0.21554 |
| <b>CLDN23</b>       | claudin 23                                                                                  | -3.41 | 0.00133  | -1.69 | 0.09183 |
| <b>BC020911</b>     | ---                                                                                         | -3.41 | 0.00068  | -1.19 | 0.50858 |
| <b>CA2</b>          | carbonic anhydrase II                                                                       | -3.40 | 0.01952  | 1.13  | 0.78525 |
| <b>TOX2</b>         | TOX high mobility group box family member 2                                                 | -3.40 | 0.0143   | 1.15  | 0.73783 |
| <b>C1orf112</b>     | chromosome 1 open reading frame 112                                                         | -3.39 | 0.00114  | -1.1  | 0.72907 |

|                     |                                                                                                |       |          |       |         |
|---------------------|------------------------------------------------------------------------------------------------|-------|----------|-------|---------|
| <b>CENPV</b>        | centromere protein V                                                                           | -3.39 | 0.00011  | 1.1   | 0.63599 |
| <b>GALNT6</b>       | UDP-N-acetyl-alpha-D-galactosamine:polypeptide N-acetylgalactosaminyltransferase 6 (GalNAc-T6) | -3.39 | 0.00014  | 1.14  | 0.54046 |
| <b>FEZ1</b>         | fasciculation and elongation protein zeta 1 (zygin I)                                          | -3.39 | 0.00021  | 1.04  | 0.86559 |
| <b>ADD2</b>         | adducin 2 (beta)                                                                               | -3.39 | 0.00129  | -1.68 | 0.09371 |
| <b>CTNNB1</b>       | catenin (cadherin-associated protein), beta 1, 88kDa                                           | -3.38 | 1.00E-04 | -1.15 | 0.49464 |
| <b>FAM83A</b>       | family with sequence similarity 83, member A                                                   | -3.38 | 0.00279  | -1.29 | 0.43941 |
| <b>HK2</b>          | hexokinase 2                                                                                   | -3.37 | 0        | -1.18 | 0.16748 |
| <b>PGM2</b>         | phosphoglucomutase 2                                                                           | -3.37 | 0.00069  | -1.56 | 0.11362 |
| <b>CEP128</b>       | centrosomal protein 128kDa                                                                     | -3.37 | 0.00173  | -1.52 | 0.17622 |
| <b>FAM46C</b>       | family with sequence similarity 46, member C                                                   | -3.36 | 0.00079  | -1.74 | 0.05686 |
| <b>SMAD3</b>        | SMAD family member 3                                                                           | -3.36 | 0.00017  | -1.42 | 0.12612 |
| <b>CNTNAP2</b>      | contactin associated protein-like 2                                                            | -3.36 | 0.00154  | 1.05  | 0.87244 |
| <b>INPP4B</b>       | inositol polyphosphate-4-phosphatase, type II, 105kDa                                          | -3.36 | 0        | -1.37 | 0.01381 |
| <b>CDC25C</b>       | cell division cycle 25 homolog C (S. pombe)                                                    | -3.35 | 0.00603  | -1.72 | 0.15227 |
| <b>SLC17A9</b>      | solute carrier family 17, member 9                                                             | -3.35 | 9.00E-05 | -1.23 | 0.31178 |
| <b>PRSS12</b>       | protease, serine, 12 (neurotrypsin, motopsin)                                                  | -3.35 | 0.03186  | 1.32  | 0.58368 |
| <b>CCNA2</b>        | cyclin A2                                                                                      | -3.35 | 0.03142  | -1.25 | 0.66059 |
| <b>PMAIP1</b>       | phorbol-12-myristate-13-acetate-induced protein 1                                              | -3.35 | 0.00146  | 1.48  | 0.19682 |
| <b>NUP210</b>       | nucleoporin 210kDa                                                                             | -3.33 | 6.00E-05 | -1.24 | 0.2806  |
| <b>HJURP</b>        | Holliday junction recognition protein                                                          | -3.33 | 0.01518  | -1.71 | 0.22348 |
| <b>RUNX1</b>        | runt-related transcription factor 1                                                            | -3.32 | 0.00111  | -1.15 | 0.61944 |
| <b>AI435073</b>     | ---                                                                                            | -3.32 | 9.00E-04 | -1.26 | 0.39973 |
| <b>LOC100506860</b> | uncharacterized LOC100506860                                                                   | -3.31 | 0        | -1.46 | 0.01351 |
| <b>ERMER34-1</b>    | endogenous retrovirus group MER34, member 1                                                    | -3.30 | 0.00084  | -1.09 | 0.75541 |
| <b>CEP55</b>        | centrosomal protein 55kDa                                                                      | -3.30 | 0.00328  | -1.38 | 0.33236 |
| <b>CA9</b>          | carbonic anhydrase IX                                                                          | -3.29 | 0.03444  | -1.85 | 0.23587 |
| <b>THBD</b>         | thrombomodulin                                                                                 | -3.29 | 0.00486  | 1.05  | 0.88989 |
| <b>TPBG</b>         | trophoblast glycoprotein                                                                       | -3.29 | 8.00E-05 | -1.15 | 0.4715  |
| <b>CCNB1</b>        | cyclin B1                                                                                      | -3.29 | 0.00812  | -1.39 | 0.39181 |
| <b>SCLY</b>         | selenocysteine lyase                                                                           | -3.28 | 0.015    | 1.31  | 0.52706 |
| <b>TK1</b>          | thymidine kinase 1, soluble                                                                    | -3.28 | 0.01742  | -1.25 | 0.61055 |
| <b>ABCG1</b>        | ATP-binding cassette, sub-family G (WHITE), member 1                                           | -3.28 | 0.00195  | -1.08 | 0.79403 |
| <b>SERPINB1</b>     | serpin peptidase inhibitor, clade B (ovalbumin), member 1                                      | -3.28 | 1.00E-05 | -1.65 | 0.00514 |
| <b>NDRG4</b>        | NDRG family member 4                                                                           | -3.28 | 0.00201  | -1.19 | 0.56409 |
| <b>TMEM51</b>       | transmembrane protein 51                                                                       | -3.28 | 1.00E-05 | -1.32 | 0.08556 |
| <b>ATAD2</b>        | ATPase family, AAA domain containing 2                                                         | -3.28 | 0.03566  | 1.28  | 0.62544 |
| <b>NPHP1</b>        | nephronophthisis 1 (juvenile)                                                                  | -3.27 | 3.00E-05 | -1.47 | 0.0444  |
| <b>HCAR3</b>        | hydroxycarboxylic acid receptor 3                                                              | -3.27 | 7.00E-05 | -1.06 | 0.76753 |
| <b>HIP1</b>         | huntingtin interacting protein 1                                                               | -3.27 | 0.00596  | 1.04  | 0.90959 |
| <b>AW009630</b>     | ---                                                                                            | -3.27 | 0.00148  | 1.16  | 0.6038  |
| <b>ARHGAP29</b>     | Rho GTPase activating protein 29                                                               | -3.26 | 2.00E-05 | -1.01 | 0.94795 |
| <b>FUT11</b>        | fucosyltransferase 11 (alpha (1,3) fucosyltransferase)                                         | -3.26 | 0.01646  | -1.66 | 0.2487  |
| <b>LINC00622</b>    | long intergenic non-protein coding RNA 622                                                     | -3.26 | 0.00199  | -1.14 | 0.65081 |
| <b>HPSE</b>         | heparanase                                                                                     | -3.26 | 0.00119  | 1.89  | 0.03772 |
| <b>BF056892</b>     | ---                                                                                            | -3.26 | 0.00166  | -1.31 | 0.36374 |

|                  |                                                                                      |       |          |       |         |
|------------------|--------------------------------------------------------------------------------------|-------|----------|-------|---------|
| <b>GPD2</b>      | glycerol-3-phosphate dehydrogenase 2 (mitochondrial)                                 | -3.26 | 0.0029   | 1.15  | 0.65494 |
| <b>RAET1E</b>    | retinoic acid early transcript 1E                                                    | -3.26 | 3.00E-05 | -1.04 | 0.8185  |
| <b>BUB1B</b>     | budding uninhibited by benzimidazoles 1 homolog beta (yeast)                         | -3.26 | 0.00624  | -1.1  | 0.78182 |
| <b>STAC</b>      | SH3 and cysteine rich domain                                                         | -3.26 | 0.00029  | -1.2  | 0.43036 |
| <b>RASGEF1A</b>  | RasGEF domain family, member 1A                                                      | -3.26 | 0.00165  | 1.93  | 0.04032 |
| <b>CDKN3</b>     | cyclin-dependent kinase inhibitor 3                                                  | -3.25 | 0.00112  | -1.51 | 0.15075 |
| <b>KIF5C</b>     | kinesin family member 5C                                                             | -3.25 | 0.00202  | 1.08  | 0.79614 |
| <b>SRPX</b>      | sushi-repeat containing protein, X-linked                                            | -3.25 | 0.00184  | 1.19  | 0.54965 |
| <b>AK022474</b>  | ---                                                                                  | -3.25 | 0.00018  | 1.01  | 0.95255 |
| <b>MAFF</b>      | v-maf musculoaponeurotic fibrosarcoma oncogene homolog F (avian)                     | -3.25 | 4.00E-05 | 1.2   | 0.31914 |
| <b>MFI2</b>      | antigen p97 (melanoma associated) identified by monoclonal antibodies 133.2 and 96.5 | -3.25 | 0.00137  | -1.07 | 0.79867 |
| <b>H1FO</b>      | H1 histone family, member 0                                                          | -3.24 | 7.00E-05 | -1.53 | 0.04592 |
| <b>JKAMP</b>     | JNK1/MAPK8-associated membrane protein                                               | -3.22 | 0.03274  | -1.49 | 0.42179 |
| <b>SPRY4-IT1</b> | SPRY4 intronic transcript 1 (non-protein coding)                                     | -3.22 | 0.03184  | 1.18  | 0.73759 |
| <b>CDC6</b>      | cell division cycle 6 homolog (S. cerevisiae)                                        | -3.22 | 4.00E-05 | -1.01 | 0.96389 |
| <b>CDCP1</b>     | CUB domain containing protein 1                                                      | -3.21 | 0.00111  | -1.52 | 0.14136 |
| <b>RGCC</b>      | regulator of cell cycle                                                              | -3.21 | 0.02073  | 1.1   | 0.82487 |
| <b>ANGPTL4</b>   | angiotensin-like 4                                                                   | -3.21 | 0.00597  | -1.22 | 0.5731  |
| <b>AI640482</b>  | ---                                                                                  | -3.20 | 0.00033  | 1     | 0.99189 |
| <b>S100A3</b>    | S100 calcium binding protein A3                                                      | -3.20 | 0.00835  | 1.29  | 0.49349 |
| <b>ENO3</b>      | enolase 3 (beta, muscle)                                                             | -3.19 | 8.00E-05 | 1.41  | 0.09206 |
| <b>SRGN</b>      | serglycin                                                                            | -3.18 | 3.00E-04 | -1.02 | 0.93817 |
| <b>AK022350</b>  | ---                                                                                  | -3.18 | 0.02706  | 1.14  | 0.78143 |
| <b>N69098</b>    | ---                                                                                  | -3.18 | 0.00039  | -1.03 | 0.89821 |
| <b>IL4R</b>      | interleukin 4 receptor                                                               | -3.18 | 1.00E-04 | -1.21 | 0.33246 |
| <b>GJB2</b>      | gap junction protein, beta 2, 26kDa                                                  | -3.18 | 0.00253  | 1.35  | 0.32958 |
| <b>EGR2</b>      | early growth response 2                                                              | -3.17 | 6.00E-05 | -1.27 | 0.20255 |
| <b>PDP1</b>      | pyruvate dehydrogenase phosphatase catalytic subunit 1                               | -3.17 | 0.0225   | 1.14  | 0.76302 |
| <b>SIX1</b>      | SIX homeobox 1                                                                       | -3.17 | 0.00489  | 1.49  | 0.24833 |
| <b>SPRED1</b>    | sprouty-related, EVH1 domain containing 1                                            | -3.16 | 0.00092  | -1.21 | 0.47189 |
| <b>AI088104</b>  | ---                                                                                  | -3.16 | 0.00791  | -1.07 | 0.85801 |
| <b>RASL11B</b>   | RAS-like, family 11, member B                                                        | -3.16 | 0.00068  | -1.06 | 0.82468 |
| <b>PRPS1</b>     | phosphoribosyl pyrophosphate synthetase 1                                            | -3.16 | 0.00463  | 1.03  | 0.91909 |
| <b>RBM24</b>     | RNA binding motif protein 24                                                         | -3.16 | 0.00474  | -1.3  | 0.43812 |
| <b>TIAM1</b>     | T-cell lymphoma invasion and metastasis 1                                            | -3.16 | 0.00886  | 1.03  | 0.93353 |
| <b>TEX30</b>     | testis expressed 30                                                                  | -3.15 | 0.00311  | 1.28  | 0.42589 |
| <b>DDX28</b>     | DEAD (Asp-Glu-Ala-Asp) box polypeptide 28                                            | -3.15 | 0.02276  | -2.19 | 0.09709 |
| <b>PRIMA1</b>    | proline rich membrane anchor 1                                                       | -3.15 | 0.00259  | -1.13 | 0.69479 |
| <b>GPRC5B</b>    | G protein-coupled receptor, family C, group 5, member B                              | -3.15 | 0.00234  | -1.9  | 0.04762 |
| <b>IL36G</b>     | interleukin 36, gamma                                                                | -3.14 | 0.00053  | -1.11 | 0.64851 |
| <b>FZD5</b>      | frizzled family receptor 5                                                           | -3.14 | 0.00251  | -1.25 | 0.46484 |
| <b>AI761207</b>  | ---                                                                                  | -3.14 | 0.00697  | 1.45  | 0.29651 |
| <b>LYPD6</b>     | LY6/PLAUR domain containing 6                                                        | -3.14 | 0.00333  | 1.04  | 0.9077  |
| <b>CHRNA5</b>    | cholinergic receptor, nicotinic, alpha 5 (neuronal)                                  | -3.13 | 0.00119  | 1.53  | 0.12825 |
| <b>PCSK9</b>     | proprotein convertase subtilisin/kexin type 9                                        | -3.13 | 0.00098  | -1.23 | 0.4326  |
| <b>PAQR4</b>     | progesterone and adipoQ receptor family member IV                                    | -3.13 | 0.00377  | 1.09  | 0.78133 |
| <b>KIF23</b>     | kinesin family member 23                                                             | -3.12 | 0.02753  | -1.37 | 0.49418 |
| <b>GCH1</b>      | GTP cyclohydrolase 1                                                                 | -3.12 | 0.00027  | -1.07 | 0.74815 |

|                 |                                                                                                      |       |          |       |         |
|-----------------|------------------------------------------------------------------------------------------------------|-------|----------|-------|---------|
| <b>ODF2</b>     | outer dense fiber of sperm tails 2                                                                   | -3.12 | 0.02259  | 1.05  | 0.90229 |
| <b>AW293316</b> | ---                                                                                                  | -3.12 | 0.02818  | -1.54 | 0.35271 |
| <b>DTL</b>      | denticleless E3 ubiquitin protein ligase homolog (Drosophila)                                        | -3.11 | 0.0014   | 1.38  | 0.2484  |
| <b>C18orf54</b> | chromosome 18 open reading frame 54                                                                  | -3.11 | 0.00456  | -1.27 | 0.46304 |
| <b>AI809536</b> | ---                                                                                                  | -3.10 | 8.00E-05 | -1.64 | 0.01949 |
| <b>PFAS</b>     | phosphoribosylformylglycinamide synthase                                                             | -3.09 | 0.00084  | -1.12 | 0.64607 |
| <b>SLC6A15</b>  | solute carrier family 6 (neutral amino acid transporter), member 15                                  | -3.09 | 0.00581  | -1.07 | 0.83558 |
| <b>WDHD1</b>    | WD repeat and HMG-box DNA binding protein 1                                                          | -3.08 | 0.00629  | 1.26  | 0.50069 |
| <b>CBS</b>      | cystathionine-beta-synthase                                                                          | -3.08 | 0.01815  | 1.31  | 0.51184 |
| <b>TSLP</b>     | thymic stromal lymphopoietin                                                                         | -3.08 | 0.00553  | -1.27 | 0.46889 |
| <b>CDCA3</b>    | cell division cycle associated 3                                                                     | -3.08 | 0.01976  | -2.16 | 0.087   |
| <b>TRMU</b>     | tRNA 5-methylaminomethyl-2-thiouridylate methyltransferase                                           | -3.08 | 0.04821  | -1.11 | 0.83775 |
| <b>AIF1L</b>    | allograft inflammatory factor 1-like                                                                 | -3.08 | 0.00021  | 1.81  | 0.01437 |
| <b>S1PR3</b>    | sphingosine-1-phosphate receptor 3                                                                   | -3.08 | 0.00619  | -1.15 | 0.67266 |
| <b>DBF4B</b>    | DBF4 homolog B (S. cerevisiae)                                                                       | -3.08 | 0.02536  | -1.31 | 0.54092 |
| <b>E2F7</b>     | E2F transcription factor 7                                                                           | -3.07 | 0.0013   | 1.32  | 0.30531 |
| <b>WWTR1</b>    | WW domain containing transcription regulator 1                                                       | -3.07 | 0.00011  | -1.38 | 0.1171  |
| <b>SCNN1A</b>   | sodium channel, non-voltage-gated 1 alpha subunit                                                    | -3.07 | 0.00038  | 1.56  | 0.06739 |
| <b>TDRKH</b>    | tudor and KH domain containing                                                                       | -3.07 | 0.01686  | 1.03  | 0.94669 |
| <b>DPH3</b>     | DPH3, KTI11 homolog (S. cerevisiae)                                                                  | -3.07 | 0.03076  | -2.1  | 0.12742 |
| <b>CENPF</b>    | centromere protein F, 350/400kDa (mitosin)                                                           | -3.06 | 0.00437  | -1.23 | 0.51816 |
| <b>ARHGAP19</b> | Rho GTPase activating protein 19                                                                     | -3.06 | 0.00498  | -1.73 | 0.11234 |
| <b>C21orf58</b> | chromosome 21 open reading frame 58                                                                  | -3.06 | 0.0065   | -1.01 | 0.98383 |
| <b>FAM27E3</b>  | family with sequence similarity 27, member E3                                                        | -3.06 | 0.00093  | -1.54 | 0.10883 |
| <b>AI701591</b> | ---                                                                                                  | -3.06 | 0.0229   | -1.66 | 0.25507 |
| <b>TTK</b>      | TTK protein kinase                                                                                   | -3.05 | 0.03161  | -1.4  | 0.47166 |
| <b>GDF11</b>    | growth differentiation factor 11                                                                     | -3.05 | 0.00546  | -1.95 | 0.06114 |
| <b>AI476341</b> | ---                                                                                                  | -3.04 | 5.00E-05 | 1.03  | 0.85934 |
| <b>HSPA12A</b>  | heat shock 70kDa protein 12A                                                                         | -3.04 | 0.00543  | 1.48  | 0.24674 |
| <b>CYR61</b>    | cysteine-rich, angiogenic inducer, 61                                                                | -3.04 | 0.03887  | 1.09  | 0.85417 |
| <b>LCN2</b>     | lipocalin 2                                                                                          | -3.04 | 0.01076  | -1.37 | 0.40369 |
| <b>HAUS7</b>    | HAUS augmin-like complex, subunit 7                                                                  | -3.03 | 0.00015  | -1.04 | 0.8597  |
| <b>ICAM3</b>    | intercellular adhesion molecule 3                                                                    | -3.03 | 0.00453  | -1.16 | 0.63775 |
| <b>TFPI2</b>    | tissue factor pathway inhibitor 2                                                                    | -3.03 | 0.00042  | -1.31 | 0.23977 |
| <b>SLC44A3</b>  | solute carrier family 44, member 3                                                                   | -3.03 | 0.00066  | -1.65 | 0.05393 |
| <b>NELL2</b>    | NEL-like 2 (chicken)                                                                                 | -3.02 | 0.00575  | 1     | 0.99726 |
| <b>WRB</b>      | tryptophan rich basic protein                                                                        | -3.02 | 3.00E-04 | -1.64 | 0.03706 |
| <b>ARPP19</b>   | cAMP-regulated phosphoprotein, 19kDa                                                                 | -3.02 | 0.03013  | -1.66 | 0.27516 |
| <b>AI085377</b> | ---                                                                                                  | -3.02 | 0.00137  | 1.08  | 0.78136 |
| <b>MTHFD2</b>   | methylenetetrahydrofolate dehydrogenase (NADP+ dependent) 2, methenyltetrahydrofolate cyclohydrolase | -3.01 | 0.00323  | 1.17  | 0.59388 |
| <b>FXD6</b>     | FXD domain containing ion transport regulator 6                                                      | -3.01 | 0.00057  | 1.19  | 0.46711 |
| <b>FAM89A</b>   | family with sequence similarity 89, member A                                                         | -3.01 | 0.00233  | 1.04  | 0.87931 |
| <b>BMP6</b>     | bone morphogenetic protein 6                                                                         | -3.00 | 4.00E-05 | 1.05  | 0.77486 |
| <b>XDH</b>      | xanthine dehydrogenase                                                                               | -3.00 | 0.00331  | -1.08 | 0.80158 |
| <b>KIAA1549</b> | KIAA1549                                                                                             | -3.00 | 0        | -1.89 | 0.00042 |
| <b>QSOX2</b>    | quiescin Q6 sulfhydryl oxidase 2                                                                     | -3.00 | 1.00E-05 | -1.63 | 0.0033  |
| <b>VSIG1</b>    | V-set and immunoglobulin domain containing 1                                                         | -3.00 | 0.00036  | -1.08 | 0.73456 |
| <b>GLIS3</b>    | GLIS family zinc finger 3                                                                            | -3.00 | 0.00035  | -1.25 | 0.31486 |

|                 |                                                                                               |       |          |       |         |
|-----------------|-----------------------------------------------------------------------------------------------|-------|----------|-------|---------|
| <b>KIF14</b>    | kinesin family member 14                                                                      | -3.00 | 0.01018  | -1.25 | 0.53575 |
| <b>AMIGO2</b>   | adhesion molecule with Ig-like domain 2                                                       | -2.99 | 0.00507  | 1.25  | 0.48514 |
| <b>C15orf23</b> | chromosome 15 open reading frame 23                                                           | -2.99 | 0.00277  | -1.28 | 0.4019  |
| <b>HEATR5A</b>  | HEAT repeat containing 5A                                                                     | -2.99 | 0.01051  | -2.03 | 0.07101 |
| <b>ERLIN1</b>   | ER lipid raft associated 1                                                                    | -2.98 | 0.01059  | -1.25 | 0.53596 |
| <b>PI3</b>      | peptidase inhibitor 3, skin-derived                                                           | -2.98 | 0.00364  | -1.99 | 0.0399  |
| <b>UGGT2</b>    | UDP-glucose glycoprotein glucosyltransferase 2                                                | -2.98 | 0.02363  | -2    | 0.12313 |
| <b>RGS20</b>    | regulator of G-protein signaling 20                                                           | -2.98 | 0.00078  | 1.08  | 0.73511 |
| <b>WDR76</b>    | WD repeat domain 76                                                                           | -2.98 | 0.00247  | 1.52  | 0.15917 |
| <b>ETV5</b>     | Ets variant 5                                                                                 | -2.97 | 5.00E-05 | -1.18 | 0.34541 |
| <b>CCNE1</b>    | cyclin E1                                                                                     | -2.96 | 6.00E-05 | 1.74  | 0.00792 |
| <b>TMTC1</b>    | transmembrane and tetratricopeptide repeat containing 1                                       | -2.96 | 0.00058  | -1    | 0.99439 |
| <b>SYT17</b>    | synaptotagmin XVII                                                                            | -2.96 | 0.00013  | 1.01  | 0.9549  |
| <b>AI494113</b> | ---                                                                                           | -2.96 | 2.00E-05 | -1.01 | 0.9727  |
| <b>BF447286</b> | ---                                                                                           | -2.96 | 0.01319  | -2.01 | 0.08345 |
| <b>AW874669</b> | ---                                                                                           | -2.96 | 0.02715  | -1.48 | 0.37096 |
| <b>AW132066</b> | ---                                                                                           | -2.96 | 0.00756  | -1.47 | 0.26977 |
| <b>TPX2</b>     | TPX2, microtubule-associated, homolog ( <i>Xenopus laevis</i> )                               | -2.95 | 0.01262  | -1.25 | 0.55424 |
| <b>FST *</b>    | follistatin                                                                                   | -2.95 | 0.00143  | 2.30  | 0.01951 |
| <b>PPM1E</b>    | protein phosphatase, Mg <sup>2+</sup> /Mn <sup>2+</sup> dependent, 1E                         | -2.95 | 0.00011  | -1.42 | 0.08189 |
| <b>SERPINE1</b> | serpin peptidase inhibitor, clade E (nexin, plasminogen activator inhibitor type 1), member 1 | -2.95 | 0.03059  | 1.05  | 0.9123  |
| <b>LRRC8B</b>   | leucine rich repeat containing 8 family, member B                                             | -2.95 | 0.00057  | -1.34 | 0.21599 |
| <b>SLC4A7</b>   | solute carrier family 4, sodium bicarbonate cotransporter, member 7                           | -2.94 | 0        | -1.43 | 0.00962 |
| <b>RBMS3</b>    | RNA binding motif, single stranded interacting protein 3                                      | -2.94 | 6.00E-05 | 1.2   | 0.28816 |
| <b>OSBP2</b>    | oxysterol binding protein 2                                                                   | -2.94 | 0.00121  | -1.14 | 0.60473 |
| <b>TMEM107</b>  | transmembrane protein 107                                                                     | -2.93 | 0.03492  | 1.06  | 0.90022 |
| <b>BIRC5</b>    | baculoviral IAP repeat containing 5                                                           | -2.93 | 0.01501  | -1.48 | 0.31013 |
| <b>GRB14</b>    | growth factor receptor-bound protein 14                                                       | -2.93 | 1.00E-05 | 1.08  | 0.54709 |
| <b>AV700891</b> | ---                                                                                           | -2.93 | 2.00E-05 | -1.05 | 0.7346  |
| <b>AA010315</b> | ---                                                                                           | -2.93 | 0.01968  | 2.03  | 0.09937 |
| <b>TSC22D1</b>  | TSC22 domain family, member 1                                                                 | -2.93 | 8.00E-05 | -1.18 | 0.36    |
| <b>CAMK4</b>    | calcium/calmodulin-dependent protein kinase IV                                                | -2.93 | 8.00E-04 | -1.21 | 0.42432 |
| <b>AK026659</b> | ---                                                                                           | -2.93 | 0.0218   | 1.4   | 0.41439 |
| <b>C11orf24</b> | chromosome 11 open reading frame 24                                                           | -2.93 | 0.00014  | -1.27 | 0.22457 |
| <b>ATP8B2</b>   | ATPase, aminophospholipid transporter, class I, type 8B, member 2                             | -2.92 | 0.01421  | 1.38  | 0.39641 |
| <b>CHL1</b>     | cell adhesion molecule with homology to L1CAM (close homolog of L1)                           | -2.92 | 0.03528  | 1.2   | 0.68595 |
| <b>DARS2</b>    | aspartyl-tRNA synthetase 2, mitochondrial                                                     | -2.92 | 0.00431  | -1.22 | 0.51669 |
| <b>SMOC1</b>    | SPARC related modular calcium binding 1                                                       | -2.92 | 0.00125  | -1.32 | 0.28696 |
| <b>HAUS6</b>    | HAUS augmin-like complex, subunit 6                                                           | -2.92 | 0.01471  | 1.25  | 0.56259 |
| <b>SMAGP</b>    | small cell adhesion glycoprotein                                                              | -2.92 | 8.00E-04 | -1.3  | 0.28407 |
| <b>CDK1</b>     | cyclin-dependent kinase 1                                                                     | -2.92 | 0.00454  | -1.23 | 0.49924 |
| <b>NFATC2</b>   | nuclear factor of activated T-cells, cytoplasmic, calcineurin-dependent 2                     | -2.92 | 0.00996  | -1.5  | 0.26124 |
| <b>FAM213B</b>  | family with sequence similarity 213, member B                                                 | -2.92 | 0.00125  | -1.33 | 0.26472 |
| <b>PRMT3</b>    | protein arginine methyltransferase 3                                                          | -2.91 | 0.01206  | -1.07 | 0.86065 |
| <b>OAS3</b>     | 2'-5'-oligoadenylate synthetase 3, 100kDa                                                     | -2.91 | 0.00226  | -1.04 | 0.88464 |

|                     |                                                                                                                  |       |          |       |         |
|---------------------|------------------------------------------------------------------------------------------------------------------|-------|----------|-------|---------|
| <b>HEYL</b>         | hairy/enhancer-of-split related with YRPW motif-like                                                             | -2.91 | 0.00946  | -1.76 | 0.12237 |
| <b>ZNRF3</b>        | zinc and ring finger 3                                                                                           | -2.91 | 0.00602  | -1.81 | 0.08326 |
| <b>TTF2</b>         | transcription termination factor, RNA polymerase II                                                              | -2.90 | 0.00899  | -1.21 | 0.57169 |
| <b>PCDHGC3</b>      | protocadherin gamma subfamily C, 3                                                                               | -2.90 | 0.0178   | 1.45  | 0.34611 |
| <b>AI936724</b>     | ---                                                                                                              | -2.90 | 0.00923  | -1.74 | 0.12796 |
| <b>FAM72A</b>       | family with sequence similarity 72, member A                                                                     | -2.90 | 0.00093  | -1.39 | 0.18827 |
| <b>CENPO</b>        | centromere protein O                                                                                             | -2.89 | 0.00093  | 1.49  | 0.11519 |
| <b>LOC100506844</b> | uncharacterized LOC100506844                                                                                     | -2.89 | 0        | -1.56 | 0.00279 |
| <b>DGKG</b>         | diacylglycerol kinase, gamma 90kDa                                                                               | -2.89 | 0.0097   | -1.31 | 0.4338  |
| <b>RSL1D1</b>       | ribosomal L1 domain containing 1                                                                                 | -2.88 | 0.00529  | -1.54 | 0.18137 |
| <b>ATP6V1C1</b>     | ATPase, H <sup>+</sup> transporting, lysosomal 42kDa, V1 subunit C1                                              | -2.88 | 0.03011  | -2.3  | 0.07575 |
| <b>HSPA2</b>        | heat shock 70kDa protein 2                                                                                       | -2.88 | 0.01408  | 1.09  | 0.81676 |
| <b>MMD</b>          | monocyte to macrophage differentiation-associated                                                                | -2.88 | 0        | 1.71  | 0.00105 |
| <b>IFITM1</b>       | interferon induced transmembrane protein 1                                                                       | -2.87 | 0.00016  | -1.15 | 0.46912 |
| <b>RAB31</b>        | RAB31, member RAS oncogene family                                                                                | -2.87 | 1.00E-05 | -1.4  | 0.03554 |
| <b>S1PR1</b>        | sphingosine-1-phosphate receptor 1                                                                               | -2.87 | 0.00223  | -1.07 | 0.81175 |
| <b>RAB38</b>        | RAB38, member RAS oncogene family                                                                                | -2.87 | 0.00285  | -1.31 | 0.34402 |
| <b>PLAUR</b>        | plasminogen activator, urokinase receptor                                                                        | -2.87 | 0.00036  | 1.39  | 0.13881 |
| <b>CD58</b>         | CD58 molecule                                                                                                    | -2.86 | 0.00297  | -1.41 | 0.2358  |
| <b>EDNRB</b>        | endothelin receptor type B                                                                                       | -2.86 | 0.02402  | 1.23  | 0.61451 |
| <b>KIAA1549L</b>    | KIAA1549-like                                                                                                    | -2.86 | 4.00E-05 | 1.06  | 0.70448 |
| <b>C9orf89</b>      | chromosome 9 open reading frame 89                                                                               | -2.86 | 0.02207  | -2.26 | 0.06227 |
| <b>R41296</b>       | ---                                                                                                              | -2.86 | 0.00212  | -1.22 | 0.46582 |
| <b>SPAG5</b>        | sperm associated antigen 5                                                                                       | -2.85 | 0.02843  | -1.22 | 0.64436 |
| <b>CALCA</b>        | calcitonin-related polypeptide alpha                                                                             | -2.85 | 0.0117   | -1.01 | 0.97185 |
| <b>TMEM194A</b>     | transmembrane protein 194A                                                                                       | -2.85 | 5.00E-05 | 1.01  | 0.95389 |
| <b>EFHD2</b>        | EF-hand domain family, member D2                                                                                 | -2.85 | 0.00821  | -1.19 | 0.59714 |
| <b>RGS16</b>        | regulator of G-protein signaling 16                                                                              | -2.84 | 0.00517  | -1.54 | 0.17751 |
| <b>TNFSF10</b>      | tumor necrosis factor (ligand) superfamily, member 10                                                            | -2.84 | 0.00748  | -1.21 | 0.55131 |
| <b>CCSAP</b>        | centriole, cilia and spindle-associated protein                                                                  | -2.84 | 0.00096  | 1.11  | 0.6664  |
| <b>CYP27B1</b>      | cytochrome P450, family 27, subfamily B, polypeptide 1                                                           | -2.83 | 0.01374  | -1.39 | 0.37589 |
| <b>SKA1</b>         | spindle and kinetochore associated complex subunit 1                                                             | -2.83 | 0.01     | 1.05  | 0.88772 |
| <b>LEPREL1</b>      | leprecan-like 1                                                                                                  | -2.83 | 5.00E-05 | -1.97 | 0.00139 |
| <b>SEMA4A</b>       | sema domain, immunoglobulin domain (Ig), transmembrane domain (TM) and short cytoplasmic domain, (semaphorin) 4A | -2.83 | 0.00365  | -1.04 | 0.88475 |
| <b>NALCN</b>        | sodium leak channel, non-selective                                                                               | -2.83 | 0.00227  | 1.2   | 0.49713 |
| <b>STAT4</b>        | signal transducer and activator of transcription 4                                                               | -2.83 | 0.00011  | -1.28 | 0.18452 |
| <b>AIDA</b>         | axin interactor, dorsalization associated                                                                        | -2.83 | 0.00041  | -1.81 | 0.01487 |
| <b>FOXD2-AS1</b>    | FOXD2 antisense RNA 1                                                                                            | -2.83 | 0.01082  | 1.06  | 0.87496 |
| <b>NDC80</b>        | NDC80 kinetochore complex component homolog (S. cerevisiae)                                                      | -2.82 | 0.00164  | -1.23 | 0.42704 |
| <b>AW117383</b>     | ---                                                                                                              | -2.82 | 0.00021  | 1.08  | 0.6898  |
| <b>PHLDA2</b>       | pleckstrin homology-like domain, family A, member 2                                                              | -2.82 | 0.00951  | 1.22  | 0.55792 |
| <b>LRRN1</b>        | leucine rich repeat neuronal 1                                                                                   | -2.82 | 0.03339  | 1.32  | 0.53025 |
| <b>STAMBPL1</b>     | STAM binding protein-like 1                                                                                      | -2.82 | 4.00E-05 | -1.06 | 0.70309 |

|                  |                                                                        |       |          |       |         |
|------------------|------------------------------------------------------------------------|-------|----------|-------|---------|
| <b>SLFN5</b>     | schlafen family member 5                                               | -2.82 | 0.01198  | -1.44 | 0.30695 |
| <b>EIF2AK3</b>   | eukaryotic translation initiation factor 2-alpha kinase 3              | -2.81 | 0.03033  | -1.48 | 0.36778 |
| <b>GOLT1B</b>    | golgi transport 1B                                                     | -2.81 | 0.00162  | -1.67 | 0.06248 |
| <b>KIF4A</b>     | kinesin family member 4A                                               | -2.81 | 0.03618  | -1.31 | 0.54604 |
| <b>C17orf96</b>  | chromosome 17 open reading frame 96                                    | -2.81 | 0.00092  | -1.08 | 0.75009 |
| <b>MCL1</b>      | myeloid cell leukemia sequence 1 (BCL2-related)                        | -2.81 | 0.04619  | -1.34 | 0.53341 |
| <b>BUB1</b>      | budding uninhibited by benzimidazoles 1 homolog (yeast)                | -2.81 | 0.00396  | -1.55 | 0.14757 |
| <b>BICD1</b>     | bicaudal D homolog 1 (Drosophila)                                      | -2.80 | 0.0018   | 1.01  | 0.96719 |
| <b>CENPA</b>     | centromere protein A                                                   | -2.80 | 0.00658  | -1.65 | 0.12915 |
| <b>EIF5A2</b>    | eukaryotic translation initiation factor 5A2                           | -2.80 | 0.00101  | 1.26  | 0.32932 |
| <b>TRIP13</b>    | thyroid hormone receptor interactor 13                                 | -2.80 | 0.00984  | 1.09  | 0.79559 |
| <b>LINC00263</b> | long intergenic non-protein coding RNA 263                             | -2.79 | 0.00925  | -1.05 | 0.88683 |
| <b>ESCO2</b>     | establishment of cohesion 1 homolog 2 (S. cerevisiae)                  | -2.79 | 0.04139  | -1.27 | 0.59484 |
| <b>N67305</b>    | ---                                                                    | -2.79 | 0.00457  | -1.02 | 0.95905 |
| <b>ULBP2</b>     | UL16 binding protein 2                                                 | -2.79 | 0.00095  | -1.61 | 0.05918 |
| <b>ESPL1</b>     | extra spindle pole bodies homolog 1 (S. cerevisiae)                    | -2.79 | 0.03505  | -1.46 | 0.38809 |
| <b>BMP8B</b>     | bone morphogenetic protein 8b                                          | -2.79 | 7.00E-05 | -1.47 | 0.03652 |
| <b>BID</b>       | BH3 interacting domain death agonist                                   | -2.79 | 0.03148  | 1.21  | 0.65728 |
| <b>TTC39B</b>    | Tetratricopeptide repeat domain 39B                                    | -2.78 | 0.00037  | -1.27 | 0.24713 |
| <b>WFDC2</b>     | WAP four-disulfide core domain 2                                       | -2.78 | 0.00024  | -1.27 | 0.23415 |
| <b>RRP7A</b>     | ribosomal RNA processing 7 homolog A (S. cerevisiae)                   | -2.78 | 0.02116  | -1.43 | 0.35958 |
| <b>PFKFB4</b>    | 6-phosphofructo-2-kinase/fructose-2,6-biphosphatase 4                  | -2.78 | 0.00181  | 1.2   | 0.4645  |
| <b>CYP4F11</b>   | cytochrome P450, family 4, subfamily F, polypeptide 11                 | -2.77 | 0.00178  | 1.01  | 0.95431 |
| <b>SHCBP1</b>    | SHC SH2-domain binding protein 1                                       | -2.77 | 0.03592  | -1.44 | 0.40584 |
| <b>FADS1</b>     | fatty acid desaturase 1                                                | -2.77 | 0.00127  | 1.09  | 0.72362 |
| <b>VEGFA</b>     | vascular endothelial growth factor A                                   | -2.77 | 0.00165  | -1.12 | 0.64269 |
| <b>C9orf72</b>   | chromosome 9 open reading frame 72                                     | -2.77 | 0.00165  | -1.01 | 0.96459 |
| <b>NUSAP1</b>    | nucleolar and spindle associated protein 1                             | -2.77 | 0.00225  | -1.47 | 0.15907 |
| <b>LOC440288</b> | uncharacterized LOC440288                                              | -2.76 | 0.02952  | -1.31 | 0.52302 |
| <b>CORO2B</b>    | coronin, actin binding protein, 2B                                     | -2.76 | 0.00062  | 1.95  | 0.00943 |
| <b>SPOPL</b>     | speckle-type POZ protein-like                                          | -2.76 | 0.0025   | -1.46 | 0.17139 |
| <b>TMEFF1</b>    | transmembrane protein with EGF-like and two follistatin-like domains 1 | -2.76 | 0.01735  | 1.1   | 0.79891 |
| <b>TMEM231</b>   | transmembrane protein 231                                              | -2.76 | 0.00393  | 1.67  | 0.09057 |
| <b>PRKD1</b>     | protein kinase D1                                                      | -2.75 | 0.00064  | 1.15  | 0.51782 |
| <b>UPP1</b>      | uridine phosphorylase 1                                                | -2.75 | 0.0041   | -1.1  | 0.74882 |
| <b>PPARG</b>     | peroxisome proliferator-activated receptor gamma                       | -2.75 | 9.00E-04 | -1.46 | 0.11478 |
| <b>UBTD2</b>     | ubiquitin domain containing 2                                          | -2.75 | 1.00E-05 | -1.56 | 0.00367 |
| <b>FHOD1</b>     | formin homology 2 domain containing 1                                  | -2.75 | 8.00E-04 | -1.09 | 0.69104 |
| <b>IL20RB</b>    | interleukin 20 receptor beta                                           | -2.75 | 0.03429  | -1.32 | 0.52005 |
| <b>FGFR4</b>     | fibroblast growth factor receptor 4                                    | -2.74 | 0.0211   | -1.38 | 0.40818 |
| <b>SUB1</b>      | SUB1 homolog (S. cerevisiae)                                           | -2.74 | 4.00E-05 | -1.78 | 0.00313 |
| <b>MYC</b>       | v-myc myelocytomatosis viral oncogene homolog (avian)                  | -2.74 | 1.00E-05 | -1.23 | 0.11935 |
| <b>RCAN1</b>     | regulator of calcineurin 1                                             | -2.74 | 5.00E-05 | -1.52 | 0.01944 |
| <b>FBXO5</b>     | F-box protein 5                                                        | -2.74 | 0.03521  | 1.06  | 0.89174 |



|                     |                                                                  |       |          |       |         |
|---------------------|------------------------------------------------------------------|-------|----------|-------|---------|
| <b>SPRY1</b>        | sprouty homolog 1, antagonist of FGF signaling (Drosophila)      | -2.73 | 0.00472  | -1.08 | 0.78259 |
| <b>GRK5</b>         | G protein-coupled receptor kinase 5                              | -2.73 | 0.00112  | -1.04 | 0.85224 |
| <b>EGLN3</b>        | egl nine homolog 3 (C. elegans)                                  | -2.73 | 0.01171  | -1.53 | 0.22465 |
| <b>PADI3</b>        | peptidyl arginine deiminase, type III                            | -2.73 | 2.00E-05 | -1.01 | 0.92524 |
| <b>FANCI</b>        | Fanconi anemia, complementation group I                          | -2.72 | 0.00417  | 1.17  | 0.57839 |
| <b>COL21A1</b>      | collagen, type XXI, alpha 1                                      | -2.72 | 0.00061  | 1.14  | 0.52966 |
| <b>RBP4</b>         | Retinol binding protein 4, plasma                                | -2.72 | 0.00435  | -1.61 | 0.11396 |
| <b>TSPAN18</b>      | tetraspanin 18                                                   | -2.72 | 0.00015  | 1.03  | 0.86381 |
| <b>BARD1</b>        | BRCA1 associated RING domain 1                                   | -2.72 | 0.00688  | 1.03  | 0.91666 |
| <b>CLIP2</b>        | CAP-GLY domain containing linker protein 2                       | -2.72 | 0.0431   | -1.24 | 0.63537 |
| <b>BE271180</b>     | ---                                                              | -2.72 | 0.01322  | -1.34 | 0.40306 |
| <b>ADA</b>          | adenosine deaminase                                              | -2.72 | 0.00077  | -1.09 | 0.7056  |
| <b>CXCL16</b>       | chemokine (C-X-C motif) ligand 16                                | -2.71 | 0.00303  | -1.89 | 0.0338  |
| <b>FAM63B</b>       | family with sequence similarity 63, member B                     | -2.71 | 0.03303  | -2.02 | 0.11366 |
| <b>LOC100506895</b> | uncharacterized LOC100506895                                     | -2.71 | 0.00604  | -1.12 | 0.69735 |
| <b>CHST2</b>        | carbohydrate (N-acetylglucosamine-6-O) sulfotransferase 2        | -2.71 | 0.0394   | -2.14 | 0.10182 |
| <b>B4GALNT1</b>     | beta-1,4-N-acetyl-galactosaminyl transferase 1                   | -2.71 | 0.03174  | -1.17 | 0.71048 |
| <b>NRN1</b>         | neuritin 1                                                       | -2.70 | 0.02391  | 1.1   | 0.79767 |
| <b>TMPRSS4</b>      | transmembrane protease, serine 4                                 | -2.70 | 0.00069  | 1.3   | 0.24116 |
| <b>KIAA1324</b>     | KIAA1324                                                         | -2.70 | 0.00626  | -1.18 | 0.58551 |
| <b>NCR3LG1</b>      | natural killer cell cytotoxicity receptor 3 ligand 1             | -2.70 | 0.01343  | -1.23 | 0.54867 |
| <b>SH2D5</b>        | SH2 domain containing 5                                          | -2.70 | 0.00181  | 1.07  | 0.78286 |
| <b>CENPK</b>        | centromere protein K                                             | -2.70 | 0.02516  | 1.42  | 0.37636 |
| <b>SLC25A43</b>     | solute carrier family 25, member 43                              | -2.69 | 0.04933  | -2.29 | 0.09123 |
| <b>MCM2</b>         | minichromosome maintenance complex component 2                   | -2.69 | 0.02566  | -1.06 | 0.87843 |
| <b>DCLRE1B</b>      | DNA cross-link repair 1B                                         | -2.69 | 0.00582  | 1.04  | 0.90083 |
| <b>BOP1</b>         | block of proliferation 1                                         | -2.69 | 0.02716  | -1.64 | 0.22988 |
| <b>ZNF114</b>       | zinc finger protein 114                                          | -2.69 | 0.00222  | 1.15  | 0.58621 |
| <b>AW961576</b>     | ---                                                              | -2.69 | 4.00E-05 | -1.28 | 0.11532 |
| <b>LOC100505668</b> | uncharacterized LOC100505668                                     | -2.69 | 0.00067  | 1.1   | 0.6434  |
| <b>RNF144A</b>      | ring finger protein 144A                                         | -2.69 | 0.00058  | -1    | 0.98744 |
| <b>NCAPG</b>        | non-SMC condensin I complex, subunit G                           | -2.69 | 0.00193  | -1.41 | 0.18312 |
| <b>IL7R</b>         | interleukin 7 receptor                                           | -2.69 | 0.00402  | 1.38  | 0.26046 |
| <b>LINC00313</b>    | long intergenic non-protein coding RNA 313                       | -2.69 | 0.00567  | -1.16 | 0.61782 |
| <b>AI361034</b>     | ---                                                              | -2.69 | 0.00458  | -1.96 | 0.03328 |
| <b>AURKA</b>        | aurora kinase A                                                  | -2.68 | 0.00332  | -1.47 | 0.16832 |
| <b>LARP6</b>        | La ribonucleoprotein domain family, member 6                     | -2.68 | 0.00864  | -1.15 | 0.66568 |
| <b>ORC6</b>         | origin recognition complex, subunit 6                            | -2.68 | 0.00107  | -1.11 | 0.65157 |
| <b>MAK16</b>        | MAK16 homolog (S. cerevisiae)                                    | -2.67 | 3.00E-04 | -1.26 | 0.24297 |
| <b>BRI3BP</b>       | BRI3 binding protein                                             | -2.67 | 0.00234  | -1.59 | 0.08937 |
| <b>AI479285</b>     | ---                                                              | -2.67 | 0.00614  | -1.09 | 0.7642  |
| <b>DSCC1</b>        | defective in sister chromatid cohesion 1 homolog (S. cerevisiae) | -2.67 | 0.00655  | 1.43  | 0.24405 |
| <b>TTC25</b>        | tetratricopeptide repeat domain 25                               | -2.67 | 0.00066  | -1.22 | 0.35888 |
| <b>PTRH2</b>        | peptidyl-tRNA hydrolase 2                                        | -2.67 | 3.00E-05 | -1.88 | 0.00112 |
| <b>FAM102B</b>      | family with sequence similarity 102, member B                    | -2.67 | 0.03744  | -1.12 | 0.7825  |
| <b>C12orf52</b>     | chromosome 12 open reading frame 52                              | -2.67 | 0.01981  | -1.98 | 0.08286 |
| <b>KNTC1</b>        | kinetochore associated 1                                         | -2.67 | 0.0011   | 1.16  | 0.51727 |
| <b>AL117546</b>     | ---                                                              | -2.67 | 0.00285  | -1.77 | 0.04714 |
| <b>KCTD15</b>       | potassium channel tetramerisation domain containing 15           | -2.67 | 0.00125  | 1.1   | 0.68588 |

|                     |                                                               |       |          |       |         |
|---------------------|---------------------------------------------------------------|-------|----------|-------|---------|
| <b>ALAD</b>         | aminolevulinatase                                             | -2.66 | 0.02093  | -1.77 | 0.14421 |
| <b>POLA2</b>        | polymerase (DNA directed), alpha 2, accessory subunit         | -2.66 | 0.02087  | -1.18 | 0.65931 |
| <b>PAPPA</b>        | pregnancy-associated plasma protein A, pappalysin 1           | -2.66 | 0.01142  | 1.15  | 0.66179 |
| <b>PRKAG2-AS1</b>   | PRKAG2 antisense RNA 1 (non-protein coding)                   | -2.66 | 0.02381  | 1.18  | 0.65786 |
| <b>POLE3</b>        | polymerase (DNA directed), epsilon 3, accessory subunit       | -2.66 | 0.046    | -1.16 | 0.73987 |
| <b>CCDC64</b>       | coiled-coil domain containing 64                              | -2.66 | 0.00017  | 1.31  | 0.14993 |
| <b>SERTAD4</b>      | SERTA domain containing 4                                     | -2.66 | 0.00373  | 1.09  | 0.75581 |
| <b>GK</b>           | glycerol kinase                                               | -2.65 | 0.00082  | -1.15 | 0.51226 |
| <b>OAF</b>          | OAF homolog (Drosophila)                                      | -2.65 | 0.00922  | -1.35 | 0.34344 |
| <b>AI638195</b>     | ---                                                           | -2.65 | 0.00427  | -1.17 | 0.56295 |
| <b>ETV4</b>         | ets variant 4                                                 | -2.65 | 5.00E-05 | -1.07 | 0.67106 |
| <b>MCTP2</b>        | multiple C2 domains, transmembrane 2                          | -2.65 | 0.01823  | 1.46  | 0.30328 |
| <b>CENPI</b>        | centromere protein I                                          | -2.64 | 0.01343  | 1.01  | 0.98709 |
| <b>BLM</b>          | Bloom syndrome, RecQ helicase-like                            | -2.64 | 0.00072  | -1.01 | 0.95799 |
| <b>TM4SF1</b>       | transmembrane 4 L six family member 1                         | -2.64 | 0.00084  | -1.12 | 0.59262 |
| <b>ITGAX</b>        | integrin, alpha X (complement component 3 receptor 4 subunit) | -2.64 | 7.00E-05 | -1.07 | 0.68765 |
| <b>TDP1</b>         | tyrosyl-DNA phosphodiesterase 1                               | -2.64 | 0.02616  | -1.29 | 0.51841 |
| <b>CNN3</b>         | calponin 3, acidic                                            | -2.64 | 0.01294  | -1.01 | 0.96797 |
| <b>KLHL23</b>       | kelch-like 23 (Drosophila)                                    | -2.63 | 0.00103  | -1.3  | 0.24451 |
| <b>FOXE1</b>        | forkhead box E1 (thyroid transcription factor 2)              | -2.63 | 0.00761  | -1.25 | 0.4617  |
| <b>PIGH</b>         | phosphatidylinositol glycan anchor biosynthesis, class H      | -2.63 | 0.00153  | -1.93 | 0.01558 |
| <b>GPR126</b>       | G protein-coupled receptor 126                                | -2.63 | 2.00E-05 | 1.08  | 0.56505 |
| <b>DNAL1</b>        | dynein, axonemal, light chain 1                               | -2.63 | 0.02379  | -1.14 | 0.72023 |
| <b>PLK4</b>         | polo-like kinase 4                                            | -2.63 | 0.02073  | 1.13  | 0.73025 |
| <b>BIRC3</b>        | baculoviral IAP repeat containing 3                           | -2.62 | 0.01083  | 1.18  | 0.60078 |
| <b>SLC39A14</b>     | solute carrier family 39 (zinc transporter), member 14        | -2.62 | 0.00018  | -1.7  | 0.01055 |
| <b>EPDR1</b>        | ependymin related protein 1 (zebrafish)                       | -2.62 | 0.00033  | -1.06 | 0.75784 |
| <b>FOXP2</b>        | forkhead box N2                                               | -2.62 | 0        | -1.41 | 0.00385 |
| <b>W91876</b>       | ---                                                           | -2.62 | 0.00221  | 1.18  | 0.50045 |
| <b>LOC100507672</b> | uncharacterized LOC100507672                                  | -2.62 | 0.00026  | -1.17 | 0.40999 |
| <b>STK17B</b>       | serine/threonine kinase 17b                                   | -2.62 | 0.00872  | -1.37 | 0.3112  |
| <b>EIF3J</b>        | eukaryotic translation initiation factor 3, subunit J         | -2.62 | 0.00417  | -1.85 | 0.04021 |
| <b>FEN1</b>         | flap structure-specific endonuclease 1                        | -2.61 | 0.01326  | 1.02  | 0.95445 |
| <b>AI686793</b>     | ---                                                           | -2.61 | 0.00132  | -1.1  | 0.68277 |
| <b>OVOS2</b>        | ovostatin 2                                                   | -2.61 | 0.00123  | 1.01  | 0.95877 |
| <b>LONRF3</b>       | LON peptidase N-terminal domain and ring finger 3             | -2.61 | 0.00106  | -1.3  | 0.24914 |
| <b>RQCD1</b>        | RCD1 required for cell differentiation1 homolog (S. pombe)    | -2.61 | 0.01114  | -1.58 | 0.17275 |
| <b>PCED1B</b>       | PC-esterase domain containing 1B                              | -2.61 | 0.00039  | -1.18 | 0.39518 |
| <b>CRIM1</b>        | cysteine rich transmembrane BMP regulator 1 (chordin-like)    | -2.60 | 0.00744  | -1.18 | 0.57718 |
| <b>KCTD12</b>       | potassium channel tetramerisation domain containing 12        | -2.60 | 0.00978  | -1.34 | 0.36295 |
| <b>THAP10</b>       | THAP domain containing 10                                     | -2.60 | 0.00341  | 1.14  | 0.6232  |
| <b>MNS1</b>         | meiosis-specific nuclear structural 1                         | -2.60 | 0.00474  | 1.24  | 0.44304 |
| <b>CLSPN</b>        | claspin                                                       | -2.60 | 0.02098  | 1.54  | 0.24794 |
| <b>AL110176</b>     | ---                                                           | -2.60 | 0.00086  | -1.57 | 0.05285 |

|                  |                                                                                         |       |          |       |         |
|------------------|-----------------------------------------------------------------------------------------|-------|----------|-------|---------|
| <b>TCF3</b>      | transcription factor 3 (E2A immunoglobulin enhancer binding factors E12/E47)            | -2.60 | 0.00249  | -1.75 | 0.04176 |
| <b>METTL21A</b>  | methyltransferase like 21A                                                              | -2.60 | 0.00919  | -1.3  | 0.39699 |
| <b>GYG2</b>      | glycogenin 2                                                                            | -2.60 | 0.00267  | -1.16 | 0.56191 |
| <b>UHRF1</b>     | ubiquitin-like with PHD and ring finger domains 1                                       | -2.60 | 0.00694  | 1.1   | 0.74569 |
| <b>H59221</b>    | ---                                                                                     | -2.60 | 0.00209  | -1.12 | 0.64994 |
| <b>AW274560</b>  | ---                                                                                     | -2.59 | 0.00052  | 1.09  | 0.67123 |
| <b>C11orf75</b>  | chromosome 11 open reading frame 75                                                     | -2.59 | 3.00E-05 | -1.06 | 0.69045 |
| <b>LOC439949</b> | uncharacterized LOC439949                                                               | -2.59 | 0.00097  | 1.13  | 0.58207 |
| <b>SYBU</b>      | syntabulin (syntaxin-interacting)                                                       | -2.59 | 0.03692  | 1.08  | 0.85227 |
| <b>MOXD1</b>     | monooxygenase, DBH-like 1                                                               | -2.59 | 3.00E-04 | -1.04 | 0.82282 |
| <b>VMA21</b>     | VMA21 vacuolar H+-ATPase homolog (S. cerevisiae)                                        | -2.58 | 0.00014  | -1.71 | 0.0077  |
| <b>LOC401052</b> | uncharacterized LOC401052                                                               | -2.58 | 0.01759  | 1.1   | 0.77821 |
| <b>ETS2</b>      | V-ets erythroblastosis virus E26 oncogene homolog 2 (avian)                             | -2.58 | 0.00025  | -1.02 | 0.91849 |
| <b>UBL3</b>      | ubiquitin-like 3                                                                        | -2.58 | 0.01858  | -2.09 | 0.05524 |
| <b>GRB10</b>     | growth factor receptor-bound protein 10                                                 | -2.58 | 0.0048   | -1.5  | 0.15747 |
| <b>AA133285</b>  | ---                                                                                     | -2.58 | 0.01514  | -1.1  | 0.78522 |
| <b>SEL1L</b>     | sel-1 suppressor of lin-12-like (C. elegans)                                            | -2.58 | 0.00085  | -1.97 | 0.00758 |
| <b>BRCA1</b>     | breast cancer 1, early onset                                                            | -2.58 | 0.00862  | 1     | 0.98965 |
| <b>LRR1</b>      | leucine rich repeat protein 1                                                           | -2.58 | 0.04335  | 1.07  | 0.87634 |
| <b>FABP4</b>     | fatty acid binding protein 4, adipocyte                                                 | -2.57 | 0.02591  | 1.05  | 0.89379 |
| <b>AA404273</b>  | ---                                                                                     | -2.57 | 0.02283  | -1.6  | 0.21323 |
| <b>C12orf75</b>  | chromosome 12 open reading frame 75                                                     | -2.57 | 0.0174   | 1.37  | 0.36353 |
| <b>LOC284561</b> | uncharacterized LOC284561                                                               | -2.57 | 0.01754  | -1.15 | 0.6847  |
| <b>AI475033</b>  | ---                                                                                     | -2.57 | 0.00162  | -1.08 | 0.74524 |
| <b>MAD2L1</b>    | MAD2 mitotic arrest deficient-like 1 (yeast)                                            | -2.57 | 0.03534  | -1.02 | 0.95535 |
| <b>MYO10</b>     | myosin X                                                                                | -2.57 | 0.00014  | -1.16 | 0.37092 |
| <b>THBS1</b>     | thrombospondin 1                                                                        | -2.57 | 0.00079  | -1.15 | 0.49431 |
| <b>EOMES</b>     | eomesodermin                                                                            | -2.57 | 0.00381  | -1.09 | 0.73514 |
| <b>HEY2</b>      | hairy/enhancer-of-split related with YRPW motif 2                                       | -2.56 | 0.00556  | 1.13  | 0.65773 |
| <b>GALNTL4</b>   | UDP-N-acetyl-alpha-D-galactosamine:polypeptide N-acetylgalactosaminyltransferase-like 4 | -2.56 | 0.00923  | 1.06  | 0.85443 |
| <b>EAF2</b>      | ELL associated factor 2                                                                 | -2.56 | 0.00149  | -1.24 | 0.35027 |
| <b>HHEX</b>      | hematopoietically expressed homeobox                                                    | -2.56 | 0.04495  | 1.18  | 0.70322 |
| <b>MLF1IP</b>    | MLF1 interacting protein                                                                | -2.55 | 0.00105  | 1.44  | 0.10925 |
| <b>ARRB2</b>     | arrestin, beta 2                                                                        | -2.55 | 0.04086  | -1.29 | 0.54157 |
| <b>ADAM8</b>     | ADAM metallopeptidase domain 8                                                          | -2.55 | 0.00074  | 1.08  | 0.72133 |
| <b>TACC3</b>     | transforming, acidic coiled-coil containing protein 3                                   | -2.55 | 0.01022  | -1.37 | 0.31784 |
| <b>BE502264</b>  | ---                                                                                     | -2.55 | 1.00E-04 | -1.1  | 0.55361 |
| <b>AW151660</b>  | ---                                                                                     | -2.55 | 7.00E-05 | -1.62 | 0.00828 |
| <b>ZWINT</b>     | ZW10 interactor                                                                         | -2.55 | 0.01679  | 1.04  | 0.89744 |
| <b>STRBP</b>     | spermatid perinuclear RNA binding protein                                               | -2.55 | 0.01308  | -1.36 | 0.34762 |
| <b>CCDC90A</b>   | coiled-coil domain containing 90A                                                       | -2.55 | 0.02223  | -1.12 | 0.75685 |
| <b>SGOL2</b>     | shugoshin-like 2 (S. pombe)                                                             | -2.55 | 0.0046   | -1.28 | 0.36083 |
| <b>FND3A</b>     | fibronectin type III domain containing 3A                                               | -2.55 | 0.01236  | -1.31 | 0.40733 |
| <b>POLR3G</b>    | polymerase (RNA) III (DNA directed) polypeptide G (32kD)                                | -2.54 | 0.01263  | 1.37  | 0.32849 |
| <b>TMTC2</b>     | transmembrane and tetratricopeptide repeat containing 2                                 | -2.54 | 0.00252  | -1.37 | 0.20843 |
| <b>GAS2L3</b>    | growth arrest-specific 2 like 3                                                         | -2.54 | 0.04244  | -1.1  | 0.81815 |
| <b>SMC4</b>      | structural maintenance of chromosomes 4                                                 | -2.54 | 0.00483  | -1.4  | 0.22406 |

|                     |                                                                                       |       |          |       |         |
|---------------------|---------------------------------------------------------------------------------------|-------|----------|-------|---------|
| <b>VMP1</b>         | vacuole membrane protein 1                                                            | -2.54 | 9.00E-05 | -1.39 | 0.05417 |
| <b>AI300077</b>     | ---                                                                                   | -2.54 | 4.00E-05 | 1.41  | 0.02884 |
| <b>NNMT</b>         | nicotinamide N-methyltransferase                                                      | -2.53 | 0.005    | -1.42 | 0.20975 |
| <b>RAD54L</b>       | RAD54-like ( <i>S. cerevisiae</i> )                                                   | -2.53 | 0.01111  | 1.44  | 0.25023 |
| <b>PCSK5</b>        | proprotein convertase subtilisin/kexin type 5                                         | -2.53 | 0.00853  | -1.13 | 0.67265 |
| <b>ARNTL</b>        | aryl hydrocarbon receptor nuclear translocator-like                                   | -2.53 | 0.00208  | -1.1  | 0.6711  |
| <b>SEMA6D</b>       | sema domain, transmembrane domain (TM), and cytoplasmic domain, (semaphorin) 6D       | -2.53 | 0.03247  | 1.25  | 0.56394 |
| <b>LOC100505730</b> | uncharacterized LOC100505730                                                          | -2.52 | 0.00012  | 1.32  | 0.10401 |
| <b>BF115851</b>     | ---                                                                                   | -2.52 | 0.00028  | -1.31 | 0.14364 |
| <b>LZTFL1</b>       | leucine zipper transcription factor-like 1                                            | -2.52 | 0.00664  | -1.5  | 0.17059 |
| <b>SH2D3A</b>       | SH2 domain containing 3A                                                              | -2.52 | 0.01852  | -1.22 | 0.56017 |
| <b>PRR3</b>         | proline rich 3                                                                        | -2.52 | 0.00145  | -1.4  | 0.1508  |
| <b>PTX3</b>         | pentraxin 3, long                                                                     | -2.52 | 0.02566  | 1.41  | 0.35397 |
| <b>RANBP1</b>       | RAN binding protein 1                                                                 | -2.51 | 0.00084  | -1.21 | 0.3568  |
| <b>E2F2</b>         | E2F transcription factor 2                                                            | -2.51 | 0.04144  | 1.29  | 0.53078 |
| <b>TMEM209</b>      | transmembrane protein 209                                                             | -2.51 | 0.00339  | -1.13 | 0.61827 |
| <b>HS6ST2</b>       | heparan sulfate 6-O-sulfotransferase 2                                                | -2.51 | 7.00E-05 | -1.02 | 0.89493 |
| <b>KIF2C</b>        | kinesin family member 2C                                                              | -2.51 | 0.0114   | -1.32 | 0.38124 |
| <b>FKBP11</b>       | FK506 binding protein 11, 19 kDa                                                      | -2.51 | 0.00359  | 1.04  | 0.88556 |
| <b>SYTL2</b>        | synaptotagmin-like 2                                                                  | -2.51 | 0.00117  | -1.5  | 0.07694 |
| <b>HTATSF1P2 *</b>  | HIV-1 Tat specific factor 1 pseudogene 2                                              | -2.51 | 0.00041  | 2.03  | 0.00266 |
| <b>FOXM1</b>        | forkhead box M1                                                                       | -2.51 | 0.02301  | -1.47 | 0.28535 |
| <b>LINC00621</b>    | long intergenic non-protein coding RNA 621                                            | -2.50 | 0.00713  | -1.56 | 0.13372 |
| <b>FHDC1</b>        | FH2 domain containing 1                                                               | -2.50 | 0.01311  | 1.48  | 0.22749 |
| <b>ARL10</b>        | ADP-ribosylation factor-like 10                                                       | -2.50 | 0.00162  | 1.08  | 0.71664 |
| <b>PNP</b>          | purine nucleoside phosphorylase                                                       | -2.49 | 0.00677  | -1    | 0.99832 |
| <b>PANX1</b>        | pannexin 1                                                                            | -2.49 | 0.00847  | 1.11  | 0.7183  |
| <b>ATP2C2</b>       | ATPase, Ca <sup>++</sup> transporting, type 2C, member 2                              | -2.49 | 0.01694  | -1.41 | 0.30556 |
| <b>SREBF1</b>       | sterol regulatory element binding transcription factor 1                              | -2.49 | 0.00164  | -1.49 | 0.09318 |
| <b>ANP32E</b>       | acidic (leucine-rich) nuclear phosphoprotein 32 family, member E                      | -2.49 | 0.00624  | 1.01  | 0.98354 |
| <b>SMAD2</b>        | SMAD family member 2                                                                  | -2.49 | 3.00E-05 | -1.89 | 0.00058 |
| <b>HMGA1</b>        | high mobility group AT-hook 1                                                         | -2.48 | 0.00011  | -1.3  | 0.10833 |
| <b>DCUN1D4</b>      | DCN1, defective in cullin neddylation 1, domain containing 4 ( <i>S. cerevisiae</i> ) | -2.48 | 0.00594  | 1.24  | 0.43264 |
| <b>PASK</b>         | PAS domain containing serine/threonine kinase                                         | -2.48 | 0.04558  | 1.54  | 0.30582 |
| <b>SPATA13</b>      | spermatogenesis associated 13                                                         | -2.48 | 0.03993  | -1.17 | 0.69167 |
| <b>CDKL1</b>        | cyclin-dependent kinase-like 1 (CDC2-related kinase)                                  | -2.48 | 0.0024   | 1.19  | 0.45233 |
| <b>ELOVL5</b>       | ELOVL fatty acid elongase 5                                                           | -2.48 | 0.00051  | -1.23 | 0.2896  |
| <b>PYCR1</b>        | pyrroline-5-carboxylate reductase 1                                                   | -2.48 | 0.00853  | -1.39 | 0.26417 |
| <b>COBL</b>         | cordon-bleu homolog (mouse)                                                           | -2.48 | 6.00E-05 | -1.21 | 0.19826 |
| <b>CPNE8</b>        | copine VIII                                                                           | -2.48 | 0.00015  | -1.15 | 0.39584 |
| <b>IQGAP3</b>       | IQ motif containing GTPase activating protein 3                                       | -2.48 | 0.03527  | -1.25 | 0.56398 |
| <b>FAM40B</b>       | family with sequence similarity 40, member B                                          | -2.47 | 0.01704  | 1.69  | 0.12949 |
| <b>AA142959</b>     | ---                                                                                   | -2.47 | 0.01508  | 1.7   | 0.11851 |
| <b>KCTD20</b>       | potassium channel tetramerisation domain containing 20                                | -2.47 | 0.00021  | -1.67 | 0.00965 |
| <b>TYRP1</b>        | tyrosinase-related protein 1                                                          | -2.47 | 0.03317  | -1.08 | 0.83029 |
| <b>GEMIN5</b>       | gem (nuclear organelle) associated protein 5                                          | -2.47 | 0.00879  | -1.02 | 0.94158 |
| <b>LOC283050</b>    | uncharacterized LOC283050                                                             | -2.47 | 0.00096  | 1.29  | 0.22704 |

|                 |                                                                                                 |       |          |       |         |
|-----------------|-------------------------------------------------------------------------------------------------|-------|----------|-------|---------|
| <b>AA933082</b> | ---                                                                                             | -2.46 | 0.01178  | 1.21  | 0.53384 |
| <b>RNASEH2A</b> | ribonuclease H2, subunit A                                                                      | -2.46 | 0.01731  | 1.34  | 0.38308 |
| <b>TYMS</b>     | thymidylate synthetase                                                                          | -2.46 | 0.00819  | 1.18  | 0.56989 |
| <b>MMP28</b>    | matrix metalloproteinase 28                                                                     | -2.46 | 0.02048  | 1     | 0.99977 |
| <b>STK17A</b>   | serine/threonine kinase 17A                                                                     | -2.46 | 0.00219  | -1.21 | 0.41295 |
| <b>FBLN1</b>    | fibulin 1                                                                                       | -2.46 | 0.00057  | -1.2  | 0.33659 |
| <b>RNASEH1</b>  | ribonuclease H1                                                                                 | -2.46 | 0.00052  | -1.81 | 0.00839 |
| <b>LHX2</b>     | LIM homeobox 2                                                                                  | -2.45 | 0.03229  | 1.1   | 0.80041 |
| <b>SLC1A5</b>   | solute carrier family 1 (neutral amino acid transporter), member 5                              | -2.45 | 0.00133  | -1.02 | 0.94146 |
| <b>MID1IP1</b>  | MID1 interacting protein 1                                                                      | -2.45 | 0.00017  | 1.01  | 0.94805 |
| <b>ITPR1</b>    | inositol 1,4,5-trisphosphate receptor, type 1                                                   | -2.45 | 0.00145  | -1.01 | 0.97876 |
| <b>MYBL1</b>    | v-myb myeloblastosis viral oncogene homolog (avian)-like 1                                      | -2.45 | 0.00726  | 1.54  | 0.14056 |
| <b>UBE2S</b>    | ubiquitin-conjugating enzyme E2S                                                                | -2.45 | 0.00311  | -1.71 | 0.04491 |
| <b>MAP3K5</b>   | mitogen-activated protein kinase kinase kinase 5                                                | -2.45 | 0.00771  | 1.21  | 0.50078 |
| <b>F2R</b>      | coagulation factor II (thrombin) receptor                                                       | -2.45 | 0.00287  | 1.15  | 0.57001 |
| <b>NPR3</b>     | natriuretic peptide receptor C/guanylate cyclase C (atrionatriuretic peptide receptor C)        | -2.45 | 0.02913  | -1.08 | 0.82628 |
| <b>OIP5</b>     | Opa interacting protein 5                                                                       | -2.45 | 0.02091  | 1.06  | 0.86146 |
| <b>AA416756</b> | ---                                                                                             | -2.44 | 0.00676  | -1.18 | 0.54798 |
| <b>HPRT1</b>    | hypoxanthine phosphoribosyltransferase 1                                                        | -2.44 | 0.00084  | 1.28  | 0.22244 |
| <b>C19orf48</b> | chromosome 19 open reading frame 48                                                             | -2.44 | 0.00313  | -1.33 | 0.24641 |
| <b>MIR21</b>    | microRNA 21                                                                                     | -2.44 | 0.00043  | -1.62 | 0.02052 |
| <b>AW954199</b> | ---                                                                                             | -2.44 | 0.00038  | -1.53 | 0.03423 |
| <b>CLMN</b>     | calmin (calponin-like, transmembrane)                                                           | -2.44 | 3.00E-05 | 1.49  | 0.00931 |
| <b>FADS2</b>    | fatty acid desaturase 2                                                                         | -2.44 | 0.04319  | 1.21  | 0.62658 |
| <b>CCDC71L</b>  | coiled-coil domain containing 71-like                                                           | -2.44 | 0.00201  | 1.63  | 0.04777 |
| <b>KIAA0040</b> | KIAA0040                                                                                        | -2.44 | 0.00094  | 1.28  | 0.23759 |
| <b>MICU1</b>    | mitochondrial calcium uptake 1                                                                  | -2.44 | 4.00E-04 | -1.84 | 0.00522 |
| <b>BACH2</b>    | BTB and CNC homology 1, basic leucine zipper transcription factor 2                             | -2.44 | 0.00147  | 1.01  | 0.97045 |
| <b>TROAP</b>    | trophinin associated protein (tastin)                                                           | -2.43 | 0.03039  | -1.81 | 0.12464 |
| <b>AI247368</b> | ---                                                                                             | -2.43 | 0.03106  | -1.33 | 0.44296 |
| <b>PID1</b>     | phosphotyrosine interaction domain containing 1                                                 | -2.43 | 0.00313  | 1.28  | 0.31848 |
| <b>WRAP53</b>   | WD repeat containing, antisense to TP53                                                         | -2.43 | 0.01505  | -1.78 | 0.088   |
| <b>KIF11</b>    | kinesin family member 11                                                                        | -2.43 | 0.01628  | -1.08 | 0.80488 |
| <b>AI986112</b> | ---                                                                                             | -2.43 | 0.00623  | -1.34 | 0.28044 |
| <b>ATP11A</b>   | ATPase, class VI, type 11A                                                                      | -2.43 | 0.00037  | -1.51 | 0.0372  |
| <b>KRT80</b>    | keratin 80                                                                                      | -2.43 | 0.0079   | 1.08  | 0.79106 |
| <b>AI797678</b> | ---                                                                                             | -2.43 | 0.0016   | -1.02 | 0.91491 |
| <b>PRC1</b>     | protein regulator of cytokinesis 1                                                              | -2.43 | 0.02746  | 1.01  | 0.97664 |
| <b>NUS1</b>     | nuclear undecaprenyl pyrophosphate synthase 1 homolog ( <i>S. cerevisiae</i> )                  | -2.43 | 0.02409  | -1.44 | 0.30188 |
| <b>NMU</b>      | neuromedin U                                                                                    | -2.42 | 0.00326  | -1.72 | 0.0412  |
| <b>PLXNA2</b>   | plexin A2                                                                                       | -2.42 | 0.00274  | 1.35  | 0.20934 |
| <b>VWA1</b>     | Von Willebrand factor A domain containing 1                                                     | -2.42 | 0.01244  | 1.04  | 0.88984 |
| <b>TSPAN4</b>   | tetraspanin 4                                                                                   | -2.42 | 0.02476  | -1.5  | 0.2583  |
| <b>AGPAT5</b>   | 1-acylglycerol-3-phosphate O-acyltransferase 5 (lysophosphatidic acid acyltransferase, epsilon) | -2.42 | 0.02888  | -1.3  | 0.46346 |
| <b>CCDC88A</b>  | coiled-coil domain containing 88A                                                               | -2.42 | 0.01121  | -1.31 | 0.36406 |
| <b>ARF3</b>     | ADP-ribosylation factor 3                                                                       | -2.42 | 0.02157  | -1.16 | 0.65946 |
| <b>LRRC49</b>   | leucine rich repeat containing 49                                                               | -2.42 | 0.00481  | -1.29 | 0.33232 |
| <b>APOLD1</b>   | apolipoprotein L domain containing 1                                                            | -2.42 | 0.01385  | -1.03 | 0.92491 |

|                  |                                                                          |       |          |       |          |
|------------------|--------------------------------------------------------------------------|-------|----------|-------|----------|
| <b>AU144916</b>  | ---                                                                      | -2.42 | 0.0269   | 1.24  | 0.53798  |
| <b>C14orf182</b> | chromosome 14 open reading frame 182                                     | -2.42 | 0.00226  | -1.17 | 0.48849  |
| <b>LANCL2</b>    | LanC lantibiotic synthetase component C-like 2 (bacterial)               | -2.42 | 0.00485  | -1.85 | 0.03153  |
| <b>NETO2</b>     | neuropilin (NRP) and tolloid (TLL)-like 2                                | -2.41 | 0.00187  | 1.07  | 0.7651   |
| <b>KIF18A</b>    | kinesin family member 18A                                                | -2.41 | 0.0258   | -1.69 | 0.15318  |
| <b>TAP2</b>      | transporter 2, ATP-binding cassette, sub-family B (MDR/TAP)              | -2.41 | 0.01963  | 1.34  | 0.37559  |
| <b>AW612461</b>  | ---                                                                      | -2.41 | 1.00E-04 | -1.11 | 0.50334  |
| <b>PLXND1</b>    | plexin D1                                                                | -2.41 | 0.00075  | 1.13  | 0.52631  |
| <b>AW293012</b>  | ---                                                                      | -2.41 | 0.00121  | -1.48 | 0.07487  |
| <b>RNF24</b>     | ring finger protein 24                                                   | -2.40 | 0.00043  | -1.09 | 0.62716  |
| <b>CORO2A</b>    | coronin, actin binding protein, 2A                                       | -2.40 | 0.03249  | 1.15  | 0.69604  |
| <b>TMEM154</b>   | transmembrane protein 154                                                | -2.40 | 0.00652  | -1.27 | 0.37194  |
| <b>ARNT2</b>     | aryl-hydrocarbon receptor nuclear translocator 2                         | -2.40 | 0.00266  | -1.29 | 0.28569  |
| <b>POLR3B</b>    | polymerase (RNA) III (DNA directed) polypeptide B                        | -2.40 | 0.01732  | -1.69 | 0.12104  |
| <b>CD44</b>      | CD44 molecule (Indian blood group)                                       | -2.40 | 0.00231  | -1.73 | 0.03049  |
| <b>NOLC1</b>     | nucleolar and coiled-body phosphoprotein 1                               | -2.39 | 0.00096  | -1.28 | 0.22562  |
| <b>UCK2</b>      | uridine-cytidine kinase 2                                                | -2.39 | 0.00064  | -1.05 | 0.77872  |
| <b>TFDP1</b>     | transcription factor Dp-1                                                | -2.39 | 0.04555  | -1.36 | 0.43873  |
| <b>TCOF1</b>     | Treacher Collins-Franceschetti syndrome 1                                | -2.39 | 4.00E-05 | -1.3  | 0.0639   |
| <b>ADAM28</b>    | ADAM metallopeptidase domain 28                                          | -2.39 | 0.00022  | 1.1   | 0.55921  |
| <b>USP14</b>     | ubiquitin specific peptidase 14 (tRNA-guanine transglycosylase)          | -2.39 | 0        | -1.94 | 4.00E-05 |
| <b>TNFAIP8</b>   | tumor necrosis factor, alpha-induced protein 8                           | -2.39 | 0.00443  | -1.29 | 0.31994  |
| <b>TMED4 *</b>   | transmembrane emp24 protein transport domain containing 4                | -2.39 | 0.00333  | 2.73  | 0        |
| <b>IPO5</b>      | importin 5                                                               | -2.39 | 0.00232  | -1.43 | 0.1274   |
| <b>RASIP1</b>    | Ras interacting protein 1                                                | -2.39 | 0.00269  | 1.12  | 0.61314  |
| <b>PYCR2</b>     | pyrroline-5-carboxylate reductase family, member 2                       | -2.39 | 0.02661  | -1.04 | 0.91637  |
| <b>GLT25D1</b>   | glycosyltransferase 25 domain containing 1                               | -2.38 | 0.02264  | -1.52 | 0.22275  |
| <b>C5orf34</b>   | chromosome 5 open reading frame 34                                       | -2.38 | 0.00023  | 1.03  | 0.87192  |
| <b>PDE3B</b>     | phosphodiesterase 3B, cGMP-inhibited                                     | -2.38 | 0.02226  | -1.5  | 0.23952  |
| <b>ATP8A1</b>    | ATPase, aminophospholipid transporter (APLT), class I, type 8A, member 1 | -2.38 | 0.02088  | -1.45 | 0.27194  |
| <b>ZAK</b>       | sterile alpha motif and leucine zipper containing kinase AZK             | -2.38 | 2.00E-05 | -1.6  | 0.00221  |
| <b>POC1A</b>     | POC1 centriolar protein homolog A (Chlamydomonas)                        | -2.38 | 0.02784  | -1.72 | 0.13972  |
| <b>MTG1</b>      | Mitochondrial GTPase 1 homolog (S. cerevisiae)                           | -2.38 | 0.02017  | -1.97 | 0.05623  |
| <b>CBX2</b>      | chromobox homolog 2                                                      | -2.38 | 0.01245  | 1.27  | 0.4204   |
| <b>AI200546</b>  | ---                                                                      | -2.38 | 0.04207  | -1.66 | 0.20524  |
| <b>CENPH</b>     | centromere protein H                                                     | -2.38 | 9.00E-04 | 1.08  | 0.7069   |
| <b>XBP1</b>      | X-box binding protein 1                                                  | -2.38 | 0.00331  | -1.43 | 0.15053  |
| <b>DKC1</b>      | dyskeratosis congenita 1, dyskerin                                       | -2.37 | 0.00029  | 1.01  | 0.96711  |
| <b>ZNF367</b>    | zinc finger protein 367                                                  | -2.37 | 0.03245  | 2.01  | 0.0731   |
| <b>GNLY</b>      | granulysin                                                               | -2.37 | 0.00021  | 1.06  | 0.72621  |
| <b>DDX39A</b>    | DEAD (Asp-Glu-Ala-Asp) box polypeptide 39A                               | -2.37 | 0.01105  | -1.27 | 0.41319  |
| <b>PER1</b>      | period homolog 1 (Drosophila)                                            | -2.37 | 0.02402  | -1.24 | 0.52737  |
| <b>NASP</b>      | nuclear autoantigenic sperm protein (histone-binding)                    | -2.37 | 0.00449  | 1.21  | 0.43475  |
| <b>BG231709</b>  | ---                                                                      | -2.37 | 0.00197  | -1.64 | 0.03915  |

|                  |                                                                              |       |          |       |         |
|------------------|------------------------------------------------------------------------------|-------|----------|-------|---------|
| <b>POLR2D</b>    | polymerase (RNA) II (DNA directed) polypeptide D                             | -2.37 | 0.00036  | -1.64 | 0.01309 |
| <b>CACNA1D</b>   | calcium channel, voltage-dependent, L type, alpha 1D subunit                 | -2.37 | 0.03258  | 1.52  | 0.25503 |
| <b>PAG1</b>      | phosphoprotein associated with glycosphingolipid microdomains 1              | -2.36 | 0.01839  | 1.66  | 0.12838 |
| <b>RAB43</b>     | RAB43, member RAS oncogene family                                            | -2.36 | 0.04006  | -1.49 | 0.29885 |
| <b>LOC728431</b> | uncharacterized LOC728431                                                    | -2.36 | 0.01613  | -1    | 0.99482 |
| <b>TMEM170B</b>  | transmembrane protein 170B                                                   | -2.36 | 0.01954  | -1.18 | 0.61547 |
| <b>CDADC1</b>    | cytidine and dCMP deaminase domain containing 1                              | -2.36 | 0.02164  | -1.31 | 0.41904 |
| <b>PPP3CB</b>    | protein phosphatase 3, catalytic subunit, beta isozyme                       | -2.36 | 0.00086  | -1.69 | 0.01756 |
| <b>LAMB1</b>     | laminin, beta 1                                                              | -2.36 | 6.00E-05 | 1.2   | 0.19315 |
| <b>C11orf96</b>  | chromosome 11 open reading frame 96                                          | -2.36 | 0.00313  | -1.28 | 0.29579 |
| <b>LIPG</b>      | lipase, endothelial                                                          | -2.36 | 0.02665  | -1.53 | 0.22736 |
| <b>WWTR1-AS1</b> | WWTR1 antisense RNA 1 (non-protein coding)                                   | -2.36 | 0.03256  | -1.14 | 0.72012 |
| <b>HILPDA</b>    | hypoxia inducible lipid droplet-associated                                   | -2.35 | 0.00459  | -1.22 | 0.42727 |
| <b>MCTP1</b>     | multiple C2 domains, transmembrane 1                                         | -2.35 | 0.00031  | 1.57  | 0.01843 |
| <b>PLEKHA6</b>   | pleckstrin homology domain containing, family A member 6                     | -2.34 | 0.00899  | 1.23  | 0.4595  |
| <b>KCNS3</b>     | potassium voltage-gated channel, delayed-rectifier, subfamily S, member 3    | -2.34 | 0.0021   | 1.19  | 0.42827 |
| <b>ZFP64</b>     | Zinc finger protein 64 homolog (mouse)                                       | -2.34 | 0.00925  | -1.05 | 0.85819 |
| <b>PDE8B</b>     | phosphodiesterase 8B                                                         | -2.34 | 0.02764  | -1.31 | 0.43286 |
| <b>NEK2</b>      | NIMA (never in mitosis gene a)-related kinase 2                              | -2.34 | 0.00354  | -1.21 | 0.42225 |
| <b>NPNT</b>      | nephronectin                                                                 | -2.34 | 0.01275  | -1.28 | 0.40209 |
| <b>RECQL</b>     | RecQ protein-like (DNA helicase Q1-like)                                     | -2.34 | 0.01012  | -1.33 | 0.31911 |
| <b>MAGOHB</b>    | mago-nashi homolog B (Drosophila)                                            | -2.34 | 0.03775  | 1.13  | 0.73338 |
| <b>KCNC4</b>     | potassium voltage-gated channel, Shaw-related subfamily, member 4            | -2.34 | 0.01957  | 1.04  | 0.90332 |
| <b>GTSE1</b>     | G-2 and S-phase expressed 1                                                  | -2.34 | 0.04456  | -1.18 | 0.66029 |
| <b>TXNDC5</b>    | thioredoxin domain containing 5 (endoplasmic reticulum)                      | -2.34 | 2.00E-05 | -1.23 | 0.11478 |
| <b>CMTM3</b>     | CKLF-like MARVEL transmembrane domain containing 3                           | -2.33 | 5.00E-05 | -1.11 | 0.4268  |
| <b>PTGES</b>     | prostaglandin E synthase                                                     | -2.33 | 0.00273  | 1.06  | 0.80894 |
| <b>TAF1A</b>     | TATA box binding protein (TBP)-associated factor, RNA polymerase I, A, 48kDa | -2.33 | 0.01708  | -1.02 | 0.93794 |
| <b>NRIP1</b>     | nuclear receptor interacting protein 1                                       | -2.33 | 0.00093  | -1.62 | 0.02643 |
| <b>LOC284751</b> | uncharacterized LOC284751                                                    | -2.33 | 0.0069   | 1.09  | 0.73639 |
| <b>NCAPH2</b>    | non-SMC condensin II complex, subunit H2                                     | -2.33 | 0.01759  | -1.11 | 0.74224 |
| <b>PPCDC</b>     | phosphopantothencysteine decarboxylase                                       | -2.33 | 0.04319  | -1.69 | 0.18142 |
| <b>CELF2</b>     | CUGBP, Elav-like family member 2                                             | -2.33 | 0.01169  | 1.34  | 0.31535 |
| <b>PPP2R2A</b>   | protein phosphatase 2, regulatory subunit B, alpha                           | -2.33 | 0.00149  | -1.82 | 0.0121  |
| <b>NCALD</b>     | neurocalcin delta                                                            | -2.33 | 0.00014  | -1.15 | 0.36343 |
| <b>SIPA1L1</b>   | signal-induced proliferation-associated 1 like 1                             | -2.33 | 0.00601  | 1.2   | 0.46585 |
| <b>RFC4</b>      | replication factor C (activator 1) 4, 37kDa                                  | -2.32 | 0.00145  | 1.22  | 0.33972 |
| <b>PRR7-AS1</b>  | PRR7 antisense RNA 1 (non-protein coding)                                    | -2.32 | 0.00051  | -1.3  | 0.15582 |
| <b>MDC1</b>      | mediator of DNA-damage checkpoint 1                                          | -2.32 | 0.00971  | -1.69 | 0.07614 |
| <b>BC000885</b>  | ---                                                                          | -2.32 | 0.03295  | -1.3  | 0.46512 |
| <b>MIR3682</b>   | microRNA 3682                                                                | -2.32 | 0.02887  | -1.88 | 0.08475 |
| <b>DISC1</b>     | disrupted in schizophrenia 1                                                 | -2.32 | 0.03095  | -1.76 | 0.12541 |
| <b>BFSP1</b>     | beaded filament structural protein 1, filensin                               | -2.32 | 0.00851  | -1.26 | 0.39768 |

|                     |                                                                                                      |       |          |       |         |
|---------------------|------------------------------------------------------------------------------------------------------|-------|----------|-------|---------|
| <b>FAM105A *</b>    | family with sequence similarity 105, member A                                                        | -2.32 | 0.01603  | 2.36  | 0.01452 |
| <b>NCOA7</b>        | nuclear receptor coactivator 7                                                                       | -2.32 | 0.00039  | -1.37 | 0.08542 |
| <b>AF052109</b>     | ---                                                                                                  | -2.32 | 0.04632  | 1.08  | 0.83737 |
| <b>RASAL1</b>       | RAS protein activator like 1 (GAP1 like)                                                             | -2.32 | 0.00679  | 1     | 0.99857 |
| <b>AV702787</b>     | ---                                                                                                  | -2.31 | 0.00058  | -1.1  | 0.57949 |
| <b>RFC3</b>         | replication factor C (activator 1) 3, 38kDa                                                          | -2.31 | 0.02842  | 1.36  | 0.36987 |
| <b>IL15RA</b>       | interleukin 15 receptor, alpha                                                                       | -2.31 | 0.00159  | -1.23 | 0.31591 |
| <b>TUBA1A</b>       | tubulin, alpha 1a                                                                                    | -2.31 | 0.04361  | 1.23  | 0.57629 |
| <b>NRTN</b>         | neurturin                                                                                            | -2.31 | 0.03453  | 1.27  | 0.5095  |
| <b>ROBO3</b>        | roundabout, axon guidance receptor, homolog 3 (Drosophila)                                           | -2.31 | 0.00022  | -1.3  | 0.11889 |
| <b>CDC42EP1</b>     | CDC42 effector protein (Rho GTPase binding) 1                                                        | -2.31 | 0.00354  | -1.64 | 0.04973 |
| <b>TBC1D1</b>       | TBC1 (tre-2/USP6, BUB2, cdc16) domain family, member 1                                               | -2.31 | 0.00108  | 1.24  | 0.2806  |
| <b>DPYSL2</b>       | dihydropyrimidinase-like 2                                                                           | -2.31 | 0.0017   | 1.32  | 0.1926  |
| <b>PIGA</b>         | phosphatidylinositol glycan anchor biosynthesis, class A                                             | -2.31 | 0.00549  | 1     | 0.98415 |
| <b>TNFRSF10B</b>    | tumor necrosis factor receptor superfamily, member 10b                                               | -2.31 | 0.02723  | -1.33 | 0.40738 |
| <b>LOC100129104</b> | uncharacterized LOC100129104                                                                         | -2.31 | 6.00E-05 | -1.26 | 0.10608 |
| <b>DCTN1</b>        | dynactin 1                                                                                           | -2.31 | 0.0107   | 1.23  | 0.4649  |
| <b>BCL10</b>        | B-cell CLL/lymphoma 10                                                                               | -2.31 | 0.00822  | -1.4  | 0.21756 |
| <b>PAX6</b>         | paired box 6                                                                                         | -2.31 | 0.00485  | 1.03  | 0.89084 |
| <b>TRIM27</b>       | tripartite motif containing 27                                                                       | -2.31 | 0.00749  | -1.34 | 0.27343 |
| <b>PRKCA</b>        | protein kinase C, alpha                                                                              | -2.31 | 0.00127  | -1.71 | 0.01815 |
| <b>TRAF3IP3</b>     | TRAF3 interacting protein 3                                                                          | -2.31 | 0.00154  | -1.31 | 0.19567 |
| <b>SGMS2</b>        | sphingomyelin synthase 2                                                                             | -2.31 | 2.00E-05 | 1.07  | 0.59431 |
| <b>VARS</b>         | valyl-tRNA synthetase                                                                                | -2.31 | 0.00934  | -1.23 | 0.45472 |
| <b>AL050136</b>     | ---                                                                                                  | -2.31 | 0.02903  | -1.34 | 0.39566 |
| <b>IER5</b>         | immediate early response 5                                                                           | -2.31 | 0.0228   | -1.23 | 0.52188 |
| <b>CCDC147</b>      | coiled-coil domain containing 147                                                                    | -2.31 | 0.02621  | -1.22 | 0.5585  |
| <b>MSANTD2</b>      | Myb/SANT-like DNA-binding domain containing 2                                                        | -2.31 | 0.02649  | -1.14 | 0.70128 |
| <b>RFESD</b>        | Rieske (Fe-S) domain containing                                                                      | -2.31 | 0.00189  | -1.2  | 0.38633 |
| <b>SNX10</b>        | sorting nexin 10                                                                                     | -2.31 | 0.0223   | 1.39  | 0.31104 |
| <b>PSEN1</b>        | presenilin 1                                                                                         | -2.31 | 0.03516  | -1.67 | 0.16472 |
| <b>MGC39372</b>     | serpin peptidase inhibitor, clade B (ovalbumin), member 9 pseudogene                                 | -2.30 | 0.0039   | -1.17 | 0.50529 |
| <b>LOC100652770</b> | Uncharacterized LOC100652770                                                                         | -2.30 | 0.00571  | -1.06 | 0.82361 |
| <b>EIF3E</b>        | eukaryotic translation initiation factor 3, subunit E                                                | -2.30 | 7.00E-05 | -1.8  | 0.00112 |
| <b>GPC4</b>         | glypican 4                                                                                           | -2.30 | 0.00761  | -1.29 | 0.33632 |
| <b>ENTPD3</b>       | ectonucleoside triphosphate diphosphohydrolase 3                                                     | -2.30 | 0.00629  | -1.14 | 0.59394 |
| <b>FAM190B</b>      | family with sequence similarity 190, member B                                                        | -2.30 | 0.00196  | -1.1  | 0.66213 |
| <b>TMEM92</b>       | transmembrane protein 92                                                                             | -2.30 | 0.00223  | -1.12 | 0.58951 |
| <b>PAICS</b>        | phosphoribosylaminoimidazole carboxylase, phosphoribosylaminoimidazole succinocarboxamide synthetase | -2.30 | 0.00028  | -1    | 0.98934 |
| <b>SEMA3B</b>       | sema domain, immunoglobulin domain (Ig), short basic domain, secreted, (semaphorin) 3B               | -2.30 | 0.00081  | -1.51 | 0.04284 |
| <b>FAM84B</b>       | family with sequence similarity 84, member B                                                         | -2.30 | 0.00118  | -1.16 | 0.45548 |
| <b>BF995452</b>     | ---                                                                                                  | -2.30 | 0.04067  | -1.37 | 0.39493 |
| <b>ADCY3</b>        | adenylate cyclase 3                                                                                  | -2.29 | 0.00472  | 1.5   | 0.10951 |
| <b>CHAF1B</b>       | chromatin assembly factor 1, subunit B (p60)                                                         | -2.29 | 0.00059  | 1.25  | 0.21498 |



|                     |                                                                    |       |          |       |         |
|---------------------|--------------------------------------------------------------------|-------|----------|-------|---------|
| <b>FJX1</b>         | four jointed box 1 (Drosophila)                                    | -2.29 | 0.04942  | -1.2  | 0.64211 |
| <b>RAP2A</b>        | RAP2A, member of RAS oncogene family                               | -2.29 | 0.00376  | -1.83 | 0.02146 |
| <b>LITAF</b>        | lipopolysaccharide-induced TNF factor                              | -2.29 | 0.00026  | -1.93 | 0.00147 |
| <b>LONRF1</b>       | LON peptidase N-terminal domain and ring finger 1                  | -2.29 | 0.00133  | -1.36 | 0.13622 |
| <b>CTSC</b>         | cathepsin C                                                        | -2.29 | 4.00E-05 | -1.26 | 0.08709 |
| <b>SLC36A4</b>      | solute carrier family 36 (proton/amino acid symporter), member 4   | -2.29 | 0.01173  | 1.15  | 0.62712 |
| <b>SRR</b>          | Serine racemase                                                    | -2.29 | 0.02903  | -1.2  | 0.58904 |
| <b>EIF2S1</b>       | eukaryotic translation initiation factor 2, subunit 1 alpha, 35kDa | -2.28 | 0.00095  | -1.6  | 0.02672 |
| <b>RCC1</b>         | regulator of chromosome condensation 1                             | -2.28 | 0.00153  | -1.17 | 0.43042 |
| <b>PITPNC1</b>      | phosphatidylinositol transfer protein, cytoplasmic 1               | -2.28 | 0.00025  | 1.06  | 0.69483 |
| <b>NABP1</b>        | nucleic acid binding protein 1                                     | -2.28 | 0.00709  | -1.37 | 0.22549 |
| <b>CD83</b>         | CD83 molecule                                                      | -2.28 | 0.00021  | -1.01 | 0.94113 |
| <b>AV646177</b>     | ---                                                                | -2.28 | 0.00343  | -1.14 | 0.57543 |
| <b>HIVEP3</b>       | human immunodeficiency virus type I enhancer binding protein 3     | -2.28 | 0.01828  | -1.09 | 0.78276 |
| <b>PC</b>           | pyruvate carboxylase                                               | -2.28 | 0.00514  | -1.28 | 0.3139  |
| <b>FAP</b>          | fibroblast activation protein, alpha                               | -2.28 | 0.03047  | -1.12 | 0.73734 |
| <b>ZBTB38</b>       | zinc finger and BTB domain containing 38                           | -2.28 | 0.00617  | -1.09 | 0.72987 |
| <b>THRB</b>         | thyroid hormone receptor, beta                                     | -2.28 | 0.00074  | 1.01  | 0.96019 |
| <b>ORC1</b>         | origin recognition complex, subunit 1                              | -2.27 | 0.04202  | -1.01 | 0.97576 |
| <b>GCSH</b>         | glycine cleavage system protein H (aminomethyl carrier)            | -2.27 | 0.00012  | 1.02  | 0.8895  |
| <b>MOCOS</b>        | molybdenum cofactor sulfurase                                      | -2.27 | 0.01098  | -1.13 | 0.65229 |
| <b>ERGIC1</b>       | endoplasmic reticulum-golgi intermediate compartment (ERGIC) 1     | -2.27 | 0.04547  | -1.11 | 0.7814  |
| <b>BC037339</b>     | ---                                                                | -2.27 | 0.01655  | -1.12 | 0.70323 |
| <b>FKBP5</b>        | FK506 binding protein 5                                            | -2.27 | 5.00E-05 | 1.04  | 0.76769 |
| <b>FMNL3</b>        | formin-like 3                                                      | -2.27 | 0.02731  | 1.06  | 0.85782 |
| <b>DPYD</b>         | dihydropyrimidine dehydrogenase                                    | -2.27 | 0.01544  | -1.09 | 0.77531 |
| <b>AW301241</b>     | ---                                                                | -2.27 | 0.03729  | -1.63 | 0.18327 |
| <b>OGFR</b>         | opioid growth factor receptor                                      | -2.27 | 0.00811  | -1.93 | 0.02449 |
| <b>AGXT2L2</b>      | alanine-glyoxylate aminotransferase 2-like 2                       | -2.27 | 0.00335  | -1.68 | 0.03746 |
| <b>NEDD1</b>        | neural precursor cell expressed, developmentally down-regulated 1  | -2.27 | 0.00303  | -1.02 | 0.93983 |
| <b>RHEBL1 *</b>     | Ras homolog enriched in brain like 1                               | -2.27 | 0.00013  | 2.24  | 0.00015 |
| <b>PTER</b>         | phosphotriesterase related                                         | -2.26 | 6.00E-05 | -1.38 | 0.02738 |
| <b>ADD3</b>         | adducin 3 (gamma)                                                  | -2.26 | 0.01916  | 1.02  | 0.9494  |
| <b>A2M</b>          | alpha-2-macroglobulin                                              | -2.26 | 0.01347  | -1.18 | 0.55515 |
| <b>FGFR1</b>        | fibroblast growth factor receptor 1                                | -2.26 | 0.00545  | 1.39  | 0.18379 |
| <b>SPCS3</b>        | signal peptidase complex subunit 3 homolog (S. cerevisiae)         | -2.26 | 0.02401  | -1.63 | 0.14507 |
| <b>PKP4</b>         | plakophilin 4                                                      | -2.26 | 0.00177  | -1.38 | 0.12607 |
| <b>PRIM1</b>        | primase, DNA, polypeptide 1 (49kDa)                                | -2.26 | 0.01068  | -1.23 | 0.45306 |
| <b>MOSPD1</b>       | motile sperm domain containing 1                                   | -2.26 | 0.04144  | -1.28 | 0.49783 |
| <b>CYP26B1</b>      | cytochrome P450, family 26, subfamily B, polypeptide 1             | -2.26 | 0.00017  | 1.43  | 0.02915 |
| <b>FIBIN</b>        | fin bud initiation factor homolog (zebrafish)                      | -2.26 | 0.04173  | 1.33  | 0.43852 |
| <b>E2F1</b>         | E2F transcription factor 1                                         | -2.25 | 0.00247  | -1.31 | 0.21302 |
| <b>RGS10</b>        | Regulator of G-protein signaling 10                                | -2.25 | 0.00125  | -1.14 | 0.49111 |
| <b>LOC100506021</b> | uncharacterized LOC100506021                                       | -2.25 | 0.00178  | 1.06  | 0.76355 |

|                 |                                                                                                         |       |          |       |         |
|-----------------|---------------------------------------------------------------------------------------------------------|-------|----------|-------|---------|
| <b>PROCR</b>    | protein C receptor, endothelial                                                                         | -2.25 | 0.0136   | -1.25 | 0.42589 |
| <b>SH2D4A</b>   | SH2 domain containing 4A                                                                                | -2.25 | 0.00016  | -1.03 | 0.86157 |
| <b>AL563613</b> | ---                                                                                                     | -2.25 | 0.00569  | -1.51 | 0.10853 |
| <b>DNMT1</b>    | DNA (cytosine-5-)-methyltransferase 1                                                                   | -2.25 | 0.00827  | -1.07 | 0.80552 |
| <b>C8orf33</b>  | chromosome 8 open reading frame 33                                                                      | -2.25 | 0.00187  | -1.91 | 0.0075  |
| <b>AGFG1</b>    | ArfGAP with FG repeats 1                                                                                | -2.25 | 0.00335  | -1.43 | 0.1261  |
| <b>AW302848</b> | ---                                                                                                     | -2.25 | 0.00219  | -1.05 | 0.79831 |
| <b>SLC1A1</b>   | solute carrier family 1 (neuronal/epithelial high affinity glutamate transporter, system Xag), member 1 | -2.25 | 0.04642  | 1.73  | 0.15474 |
| <b>SAMD9</b>    | sterile alpha motif domain containing 9                                                                 | -2.25 | 0.02845  | 1.21  | 0.56532 |
| <b>ME2</b>      | malic enzyme 2, NAD(+)-dependent, mitochondrial                                                         | -2.25 | 0.01237  | -1.33 | 0.31499 |
| <b>BNIP3L</b>   | BCL2/adenovirus E1B 19kDa interacting protein 3-like                                                    | -2.25 | 0.00379  | -1.26 | 0.31986 |
| <b>ANKRD29</b>  | ankyrin repeat domain 29                                                                                | -2.25 | 0.00601  | -1.38 | 0.20437 |
| <b>SPRED2</b>   | sprouty-related, EVH1 domain containing 2                                                               | -2.24 | 0.03321  | -1.13 | 0.71683 |
| <b>SLC30A1</b>  | solute carrier family 30 (zinc transporter), member 1                                                   | -2.24 | 0.00011  | -1.61 | 0.00516 |
| <b>VKORC1L1</b> | vitamin K epoxide reductase complex, subunit 1-like 1                                                   | -2.24 | 0.0034   | -1.55 | 0.06868 |
| <b>GJC1</b>     | gap junction protein, gamma 1, 45kDa                                                                    | -2.24 | 0.02626  | 1.88  | 0.0706  |
| <b>RFC2</b>     | replication factor C (activator 1) 2, 40kDa                                                             | -2.24 | 0.00028  | -1.25 | 0.16756 |
| <b>HPCAL1</b>   | hippocalcin-like 1                                                                                      | -2.24 | 0.00325  | -1.43 | 0.11893 |
| <b>DPYSL3</b>   | dihydropyrimidinase-like 3                                                                              | -2.24 | 0.00301  | -1.15 | 0.51253 |
| <b>NQO1</b>     | NAD(P)H dehydrogenase, quinone 1                                                                        | -2.24 | 0.00109  | -1.5  | 0.04684 |
| <b>ZNF227</b>   | zinc finger protein 227                                                                                 | -2.24 | 0.03937  | -1.66 | 0.16846 |
| <b>C12orf60</b> | chromosome 12 open reading frame 60                                                                     | -2.24 | 0.00625  | 1.15  | 0.5622  |
| <b>RFC5</b>     | replication factor C (activator 1) 5, 36.5kDa                                                           | -2.24 | 0.02702  | 1.24  | 0.50596 |
| <b>CENPJ</b>    | centromere protein J                                                                                    | -2.24 | 0.01464  | -1.19 | 0.54285 |
| <b>TSNAX</b>    | translin-associated factor X                                                                            | -2.24 | 0.01814  | -1.45 | 0.22274 |
| <b>SGK494</b>   | uncharacterized serine/threonine-protein kinase SgK494                                                  | -2.24 | 0.0028   | -1.06 | 0.78249 |
| <b>BATF3</b>    | basic leucine zipper transcription factor, ATF-like 3                                                   | -2.24 | 0.02917  | 1.09  | 0.79182 |
| <b>RAB27A</b>   | RAB27A, member RAS oncogene family                                                                      | -2.23 | 0.00712  | -1.1  | 0.69552 |
| <b>ITM2C</b>    | integral membrane protein 2C                                                                            | -2.23 | 0.00116  | -1.48 | 0.05686 |
| <b>MYO1B</b>    | myosin IB                                                                                               | -2.23 | 0.00385  | -1.14 | 0.55547 |
| <b>DHRS13</b>   | dehydrogenase/reductase (SDR family) member 13                                                          | -2.23 | 0.00021  | 1.3   | 0.09816 |
| <b>PPM1J</b>    | protein phosphatase, Mg <sup>2+</sup> /Mn <sup>2+</sup> dependent, 1J                                   | -2.23 | 0.00236  | -1.15 | 0.49572 |
| <b>NLN</b>      | neurolysin (metallopeptidase M3 family)                                                                 | -2.23 | 0.00424  | 1.21  | 0.41328 |
| <b>PPT1</b>     | palmitoyl-protein thioesterase 1                                                                        | -2.23 | 1.00E-04 | -1.77 | 0.00138 |
| <b>CENPM</b>    | centromere protein M                                                                                    | -2.23 | 0.01289  | -1.23 | 0.45803 |
| <b>PHF19</b>    | PHD finger protein 19                                                                                   | -2.23 | 0.0144   | -1.05 | 0.86182 |
| <b>SNX3</b>     | sorting nexin 3                                                                                         | -2.23 | 0.00377  | -1.45 | 0.11734 |
| <b>NCAPG2</b>   | non-SMC condensin II complex, subunit G2                                                                | -2.23 | 0.00446  | 1.11  | 0.65583 |
| <b>MFSD12</b>   | major facilitator superfamily domain containing 12                                                      | -2.23 | 0.00065  | 1.28  | 0.17262 |
| <b>SLC6A6</b>   | solute carrier family 6 (neurotransmitter transporter, taurine), member 6                               | -2.23 | 0.00075  | -1.5  | 0.03687 |
| <b>BF432941</b> | ---                                                                                                     | -2.23 | 0.01014  | -1.44 | 0.18532 |
| <b>AL832803</b> | ---                                                                                                     | -2.23 | 0.00444  | -1.05 | 0.82855 |
| <b>KITLG</b>    | KIT ligand                                                                                              | -2.23 | 0.00035  | 1.18  | 0.29968 |

|                   |                                                                      |       |          |       |         |
|-------------------|----------------------------------------------------------------------|-------|----------|-------|---------|
| <b>CORO1C</b>     | coronin, actin binding protein, 1C                                   | -2.23 | 0.00317  | 1.03  | 0.90464 |
| <b>RTKN2</b>      | rhotekin 2                                                           | -2.23 | 0.04338  | -1.22 | 0.58403 |
| <b>TMPO</b>       | thymopoietin                                                         | -2.22 | 0.02857  | 1.07  | 0.8362  |
| <b>ALKBH2</b>     | alkB, alkylation repair homolog 2 (E. coli)                          | -2.22 | 0.03059  | -1.13 | 0.71055 |
| <b>KIAA1524</b>   | KIAA1524                                                             | -2.22 | 0.0155   | -1.25 | 0.44209 |
| <b>PRPS2</b>      | Phosphoribosyl pyrophosphate synthetase 2                            | -2.22 | 0.01436  | 1.26  | 0.40752 |
| <b>TFR2</b>       | transferrin receptor 2                                               | -2.22 | 0.00478  | 1.89  | 0.0165  |
| <b>TOP1MT</b>     | topoisomerase (DNA) I, mitochondrial                                 | -2.22 | 0.00256  | -1.85 | 0.01217 |
| <b>TMC7</b>       | transmembrane channel-like 7                                         | -2.22 | 0.00061  | -1.21 | 0.27778 |
| <b>ARSI</b>       | arylsulfatase family, member I                                       | -2.22 | 0.00063  | -1.1  | 0.57633 |
| <b>IRAK2</b>      | interleukin-1 receptor-associated kinase 2                           | -2.22 | 0.00285  | 1.36  | 0.16075 |
| <b>C3orf80</b>    | chromosome 3 open reading frame 80                                   | -2.22 | 0.02345  | 1.87  | 0.06251 |
| <b>SORD</b>       | sorbitol dehydrogenase                                               | -2.22 | 0.00933  | -1.1  | 0.70219 |
| <b>MAPRE2</b>     | microtubule-associated protein, RP/EB family, member 2               | -2.22 | 0.03019  | -1.09 | 0.79444 |
| <b>ATP2B1</b>     | ATPase, Ca <sup>++</sup> transporting, plasma membrane 1             | -2.22 | 0.01145  | -1.18 | 0.54771 |
| <b>TMEM205</b>    | transmembrane protein 205                                            | -2.22 | 0.02995  | -1.13 | 0.70617 |
| <b>KRT6B</b>      | keratin 6B                                                           | -2.22 | 0.0132   | -1.03 | 0.90177 |
| <b>CARS</b>       | cysteinyl-tRNA synthetase                                            | -2.22 | 0.01605  | 1.38  | 0.27103 |
| <b>TRAM2</b>      | translocation associated membrane protein 2                          | -2.21 | 0.00268  | -1.43 | 0.10677 |
| <b>DTYMK</b>      | deoxythymidylate kinase (thymidylate kinase)                         | -2.21 | 0.0375   | -1.18 | 0.63197 |
| <b>CCL20 *</b>    | chemokine (C-C motif) ligand 20                                      | -2.21 | 0.01529  | 3.63  | 0.00076 |
| <b>ATP2A2</b>     | ATPase, Ca <sup>++</sup> transporting, cardiac muscle, slow twitch 2 | -2.21 | 0.02918  | -1.35 | 0.35864 |
| <b>CHAF1A</b>     | chromatin assembly factor 1, subunit A (p150)                        | -2.21 | 0.04633  | -1.07 | 0.84735 |
| <b>DBF4</b>       | DBF4 homolog (S. cerevisiae)                                         | -2.21 | 0.02998  | 1.09  | 0.79053 |
| <b>GIT2</b>       | G protein-coupled receptor kinase interacting ArfGAP 2               | -2.21 | 0.00715  | -1.12 | 0.64614 |
| <b>ADAM19</b>     | ADAM metallopeptidase domain 19                                      | -2.21 | 0.01085  | 1.89  | 0.03121 |
| <b>NTRK2</b>      | neurotrophic tyrosine kinase, receptor, type 2                       | -2.21 | 0.02626  | 1.14  | 0.67468 |
| <b>PURA</b>       | purine-rich element binding protein A                                | -2.21 | 0.00904  | -1.76 | 0.04505 |
| <b>MIS18A</b>     | MIS18 kinetochore protein homolog A (S. pombe)                       | -2.21 | 0.00038  | -1.07 | 0.66733 |
| <b>UBE4A</b>      | ubiquitination factor E4A                                            | -2.21 | 0.00016  | -1.63 | 0.00495 |
| <b>SLC44A1</b>    | solute carrier family 44, member 1                                   | -2.21 | 0.00111  | -1.63 | 0.02018 |
| <b>RNF157-AS1</b> | RNF157 antisense RNA 1 (non-protein coding)                          | -2.21 | 0.03193  | -1.24 | 0.52195 |
| <b>TCF7L2</b>     | transcription factor 7-like 2 (T-cell specific, HMG-box)             | -2.20 | 0.00939  | -1.39 | 0.2117  |
| <b>SAAL1</b>      | serum amyloid A-like 1                                               | -2.20 | 1.00E-04 | 1.03  | 0.84244 |
| <b>FRMD5</b>      | FERM domain containing 5                                             | -2.20 | 0.04546  | -1.56 | 0.22615 |
| <b>AI807197</b>   | ---                                                                  | -2.20 | 0.01074  | -1.14 | 0.62055 |
| <b>KRT86</b>      | keratin 86                                                           | -2.20 | 0.00972  | -1.19 | 0.51024 |
| <b>PPP4R4</b>     | protein phosphatase 4, regulatory subunit 4                          | -2.20 | 0.01076  | -1.05 | 0.8398  |
| <b>CDK17</b>      | cyclin-dependent kinase 17                                           | -2.20 | 0.00038  | -2    | 0.00103 |
| <b>AGMAT</b>      | agmatine ureohydrolase (agmatinase)                                  | -2.20 | 0.03134  | 1.15  | 0.66494 |
| <b>TGOLN2</b>     | trans-golgi network protein 2                                        | -2.20 | 0.02572  | -1.48 | 0.22278 |
| <b>ENOX2</b>      | ecto-NOX disulfide-thiol exchanger 2                                 | -2.20 | 0.00178  | -1.74 | 0.01448 |
| <b>SNORA56</b>    | small nucleolar RNA, H/ACA box 56                                    | -2.20 | 2.00E-05 | -1.1  | 0.39192 |
| <b>LRR8D</b>      | leucine rich repeat containing 8 family, member D                    | -2.20 | 8.00E-05 | -1.44 | 0.01527 |
| <b>MAPKAPK2</b>   | mitogen-activated protein kinase-activated protein kinase 2          | -2.20 | 0.03525  | -1.35 | 0.37997 |
| <b>CDC20</b>      | cell division cycle 20 homolog (S. cerevisiae)                       | -2.20 | 0.0152   | -1.42 | 0.22698 |
| <b>POLE2</b>      | polymerase (DNA directed), epsilon 2, accessory subunit              | -2.19 | 0.00305  | 1.38  | 0.14561 |

|                     |                                                                                                                            |       |          |       |         |
|---------------------|----------------------------------------------------------------------------------------------------------------------------|-------|----------|-------|---------|
| <b>SLC5A3</b>       | solute carrier family 5 (sodium/myo-inositol cotransporter), member 3                                                      | -2.19 | 0.00064  | -1.35 | 0.09497 |
| <b>ACOT7</b>        | acyl-CoA thioesterase 7                                                                                                    | -2.19 | 0.01286  | 1.49  | 0.1606  |
| <b>BRCA2</b>        | breast cancer 2, early onset                                                                                               | -2.19 | 0.00337  | -1.05 | 0.82534 |
| <b>CD97</b>         | CD97 molecule                                                                                                              | -2.19 | 0.01929  | -1.13 | 0.68602 |
| <b>WBSCR22</b>      | Williams Beuren syndrome chromosome region 22                                                                              | -2.19 | 0.00539  | -1.59 | 0.06411 |
| <b>GATA6</b>        | GATA binding protein 6                                                                                                     | -2.19 | 0.00924  | -1.08 | 0.75527 |
| <b>APOE</b>         | Apolipoprotein E                                                                                                           | -2.19 | 0.03356  | -1.52 | 0.21785 |
| <b>TXNDC16</b>      | thioredoxin domain containing 16                                                                                           | -2.19 | 0.01059  | 1.08  | 0.76037 |
| <b>LIMCH1</b>       | LIM and calponin homology domains 1                                                                                        | -2.19 | 1.00E-05 | -1.03 | 0.79926 |
| <b>AW362945</b>     | ---                                                                                                                        | -2.19 | 0.00149  | 1.05  | 0.78704 |
| <b>BC040884</b>     | ---                                                                                                                        | -2.19 | 0.01115  | 1.05  | 0.84784 |
| <b>C11orf9</b>      | chromosome 11 open reading frame 9                                                                                         | -2.19 | 0.008    | -1.68 | 0.05511 |
| <b>PDXP</b>         | pyridoxal (pyridoxine, vitamin B6) phosphatase                                                                             | -2.19 | 0.01438  | -1.19 | 0.53518 |
| <b>BAG4</b>         | BCL2-associated athanogene 4                                                                                               | -2.19 | 0.00817  | -1.33 | 0.25824 |
| <b>RPL31</b>        | ribosomal protein L31                                                                                                      | -2.19 | 0.00079  | -1.35 | 0.10374 |
| <b>HAUS1</b>        | HAUS augmin-like complex, subunit 1                                                                                        | -2.18 | 0.00335  | -1    | 0.99311 |
| <b>IFT81</b>        | intraflagellar transport 81 homolog (Chlamydomonas)                                                                        | -2.18 | 0.00016  | 1.32  | 0.06921 |
| <b>AI638063</b>     | ---                                                                                                                        | -2.18 | 0.03209  | -1.29 | 0.44455 |
| <b>PRIM2</b>        | primase, DNA, polypeptide 2 (58kDa)                                                                                        | -2.18 | 0.02349  | 1.05  | 0.87948 |
| <b>WAPAL</b>        | wings apart-like homolog (Drosophila)                                                                                      | -2.18 | 0.01618  | -1.36 | 0.28639 |
| <b>AI672356</b>     | ---                                                                                                                        | -2.18 | 0.00827  | -1.18 | 0.51216 |
| <b>WDR35</b>        | WD repeat domain 35                                                                                                        | -2.18 | 0.00308  | -1.21 | 0.3632  |
| <b>GART</b>         | phosphoribosylglycinamide formyltransferase, phosphoribosylglycinamide synthetase, phosphoribosylaminoimidazole synthetase | -2.18 | 0.00635  | -1.64 | 0.05574 |
| <b>AK021887</b>     | ---                                                                                                                        | -2.18 | 0.00157  | 1.06  | 0.74497 |
| <b>BE551781</b>     | ---                                                                                                                        | -2.17 | 0.00067  | -1.15 | 0.40243 |
| <b>PLK1S1</b>       | polo-like kinase 1 substrate 1                                                                                             | -2.17 | 0.00292  | -1.37 | 0.14501 |
| <b>N34514</b>       | ---                                                                                                                        | -2.17 | 0.04764  | -1.18 | 0.64836 |
| <b>PRDX3</b>        | peroxiredoxin 3                                                                                                            | -2.17 | 2.00E-05 | -1.15 | 0.20936 |
| <b>TRIB1</b>        | tribbles homolog 1 (Drosophila)                                                                                            | -2.17 | 0.00769  | -1.95 | 0.01698 |
| <b>LOC100507535</b> | uncharacterized LOC100507535                                                                                               | -2.17 | 0.0046   | -2.47 | 0.00172 |
| <b>CASP9</b>        | caspase 9, apoptosis-related cysteine peptidase                                                                            | -2.17 | 4.00E-05 | 1.24  | 0.0897  |
| <b>PXK</b>          | PX domain containing serine/threonine kinase                                                                               | -2.17 | 0.02051  | 1.02  | 0.95044 |
| <b>LOC100505634</b> | uncharacterized LOC100505634                                                                                               | -2.17 | 0.03313  | 1.05  | 0.8707  |
| <b>PPIF</b>         | peptidylprolyl isomerase F                                                                                                 | -2.17 | 6.00E-05 | -1.94 | 0.00022 |
| <b>ZNF37BP</b>      | zinc finger protein 37B, pseudogene                                                                                        | -2.17 | 0.04363  | 1.09  | 0.79847 |
| <b>AA523939</b>     | ---                                                                                                                        | -2.17 | 0.00911  | 1.64  | 0.06745 |
| <b>AP2B1</b>        | adaptor-related protein complex 2, beta 1 subunit                                                                          | -2.17 | 0.00038  | -1.44 | 0.03486 |
| <b>CREB5 *</b>      | cAMP responsive element binding protein 5                                                                                  | -2.17 | 0.02318  | 2.11  | 0.02696 |
| <b>POLD3</b>        | polymerase (DNA-directed), delta 3, accessory subunit                                                                      | -2.17 | 0.00555  | -1.01 | 0.96754 |
| <b>ALG13</b>        | asparagine-linked glycosylation 13 homolog (S. cerevisiae)                                                                 | -2.16 | 0.04856  | -1.08 | 0.83066 |
| <b>LOC728613</b>    | programmed cell death 6 pseudogene                                                                                         | -2.16 | 0.00034  | -1.23 | 0.19204 |
| <b>LEPREL4</b>      | leprecan-like 4                                                                                                            | -2.16 | 0.00053  | -1.55 | 0.01858 |
| <b>EXOSC2</b>       | exosome component 2                                                                                                        | -2.16 | 8.00E-05 | -1.32 | 0.04517 |
| <b>TBL2</b>         | transducin (beta)-like 2                                                                                                   | -2.16 | 0.00899  | -1.56 | 0.0937  |
| <b>SLC7A2</b>       | solute carrier family 7 (cationic amino acid transporter, y+ system), member 2                                             | -2.16 | 0.01212  | 1.11  | 0.68504 |
| <b>CUL4A</b>        | cullin 4A                                                                                                                  | -2.16 | 0.01549  | -1.48 | 0.17069 |

|                 |                                                                       |       |          |       |         |
|-----------------|-----------------------------------------------------------------------|-------|----------|-------|---------|
| <b>GNAS-AS1</b> | GNAS antisense RNA 1 (non-protein coding)                             | -2.16 | 0.02563  | -1.19 | 0.56398 |
| <b>EME1</b>     | essential meiotic endonuclease 1 homolog 1 (S. pombe)                 | -2.16 | 0.02229  | -1.35 | 0.32407 |
| <b>RASSF10</b>  | Ras association (RalGDS/AF-6) domain family (N-terminal) member 10    | -2.16 | 0.01003  | 1.16  | 0.55756 |
| <b>SOCS2 *</b>  | suppressor of cytokine signaling 2                                    | -2.16 | 0.01048  | 2.3   | 0.00678 |
| <b>PER2</b>     | period homolog 2 (Drosophila)                                         | -2.16 | 0.03433  | -1.46 | 0.25977 |
| <b>MTMR2</b>    | myotubularin related protein 2                                        | -2.16 | 0.01277  | -1.21 | 0.46671 |
| <b>ADPRM</b>    | ADP-ribose/CDP-alcohol diphosphatase, manganese                       | -2.16 | 0.03609  | -1.61 | 0.16578 |
| <b>PKMYT1</b>   | protein kinase, membrane associated tyrosine/threonine 1              | -2.16 | 0.002    | -1.03 | 0.87025 |
| <b>XK</b>       | X-linked Kx blood group (McLeod syndrome)                             | -2.16 | 1.00E-04 | 1.07  | 0.62658 |
| <b>RPRD1A</b>   | regulation of nuclear pre-mRNA domain containing 1A                   | -2.16 | 0.01001  | -1.77 | 0.04175 |
| <b>HIST1H1A</b> | histone cluster 1, H1a                                                | -2.16 | 0.00339  | -1.35 | 0.16533 |
| <b>MCM4</b>     | minichromosome maintenance complex component 4                        | -2.16 | 0.02153  | -1.24 | 0.46879 |
| <b>AV700165</b> | ---                                                                   | -2.16 | 0.00874  | 1.14  | 0.6041  |
| <b>NOP16</b>    | NOP16 nucleolar protein homolog (yeast)                               | -2.16 | 0.02944  | -1.33 | 0.37344 |
| <b>RPL13P5</b>  | ribosomal protein L13 pseudogene 5                                    | -2.16 | 0.00609  | -1.3  | 0.26351 |
| <b>HOXA2</b>    | homeobox A2                                                           | -2.16 | 0.00518  | 1.18  | 0.47046 |
| <b>ANKRD27</b>  | ankyrin repeat domain 27 (VPS9 domain)                                | -2.16 | 2.00E-05 | -1.85 | 0.00012 |
| <b>HYAL1</b>    | hyaluronoglucosaminidase 1                                            | -2.15 | 0.01291  | -1.32 | 0.3061  |
| <b>CASK</b>     | calcium/calmodulin-dependent serine protein kinase (MAGUK family)     | -2.15 | 0.00644  | -1.2  | 0.44065 |
| <b>PCP4L1</b>   | Purkinje cell protein 4 like 1                                        | -2.15 | 0.00098  | -1.05 | 0.76425 |
| <b>DUSP1</b>    | Dual specificity phosphatase 1                                        | -2.15 | 0.03823  | -1.1  | 0.77805 |
| <b>STEAP1B</b>  | STEAP family member 1B                                                | -2.15 | 0.00217  | -1.09 | 0.65694 |
| <b>ZWILCH</b>   | Zwilch, kinetochore associated, homolog (Drosophila)                  | -2.15 | 0.01575  | 1.11  | 0.70745 |
| <b>SLC37A3</b>  | solute carrier family 37 (glycerol-3-phosphate transporter), member 3 | -2.15 | 0.00781  | -1.56 | 0.08471 |
| <b>HSD17B12</b> | hydroxysteroid (17-beta) dehydrogenase 12                             | -2.14 | 0.00923  | 1.03  | 0.90883 |
| <b>GOSR2</b>    | golgi SNAP receptor complex member 2                                  | -2.14 | 0.03711  | -1.43 | 0.2883  |
| <b>THSD4</b>    | thrombospondin, type I, domain containing 4                           | -2.14 | 0.01684  | 1.1   | 0.73467 |
| <b>UBA2</b>     | ubiquitin-like modifier activating enzyme 2                           | -2.14 | 0.01256  | -1.35 | 0.2591  |
| <b>SAMD8</b>    | sterile alpha motif domain containing 8                               | -2.14 | 0.04886  | 1.05  | 0.89641 |
| <b>FZD4</b>     | frizzled family receptor 4                                            | -2.14 | 0.00046  | -1.15 | 0.37176 |
| <b>BZW1</b>     | basic leucine zipper and W2 domains 1                                 | -2.14 | 0.00568  | -1.19 | 0.43636 |
| <b>C1orf198</b> | chromosome 1 open reading frame 198                                   | -2.14 | 0.01711  | -1.02 | 0.93921 |
| <b>DCAF13</b>   | DDB1 and CUL4 associated factor 13                                    | -2.14 | 0.00442  | -1.36 | 0.17158 |
| <b>SCD</b>      | stearoyl-CoA desaturase (delta-9-desaturase)                          | -2.14 | 0.04806  | 1.08  | 0.83268 |
| <b>NAMPT</b>    | nicotinamide phosphoribosyltransferase                                | -2.14 | 0.00475  | 1.05  | 0.80757 |
| <b>TFDP2</b>    | transcription factor Dp-2 (E2F dimerization partner 2)                | -2.14 | 0.02505  | 1.26  | 0.44406 |
| <b>TRIB2</b>    | tribbles homolog 2 (Drosophila)                                       | -2.13 | 0.04787  | -1.04 | 0.91538 |
| <b>MMP1</b>     | matrix metalloproteinase 1 (interstitial collagenase)                 | -2.13 | 0.00423  | -1.02 | 0.91305 |
| <b>UBE2T</b>    | ubiquitin-conjugating enzyme E2T (putative)                           | -2.13 | 0.00971  | 1.1   | 0.70586 |
| <b>BF445387</b> | ---                                                                   | -2.13 | 0.00411  | -1.09 | 0.68739 |
| <b>APLP1</b>    | amyloid beta (A4) precursor-like protein 1                            | -2.13 | 0.00032  | 1.16  | 0.33678 |
| <b>ZNF473</b>   | zinc finger protein 473                                               | -2.13 | 0.04825  | -1.61 | 0.1864  |
| <b>FLJ11871</b> | hypothetical protein FLJ11871                                         | -2.13 | 0.04852  | -1.96 | 0.07438 |

|                     |                                                                      |       |          |       |         |
|---------------------|----------------------------------------------------------------------|-------|----------|-------|---------|
| <b>SLC2A14</b>      | solute carrier family 2 (facilitated glucose transporter), member 14 | -2.13 | 0.00724  | 1.45  | 0.13219 |
| <b>IGF2BP2</b>      | insulin-like growth factor 2 mRNA binding protein 2                  | -2.13 | 0.00054  | -1.28 | 0.14498 |
| <b>USP54</b>        | ubiquitin specific peptidase 54                                      | -2.13 | 0.01173  | -1.3  | 0.31978 |
| <b>AW611560</b>     | ---                                                                  | -2.13 | 0.00268  | 1.08  | 0.71556 |
| <b>TMF1</b>         | TATA element modulatory factor 1                                     | -2.13 | 0.00277  | -1.36 | 0.14701 |
| <b>BCL2</b>         | B-cell CLL/lymphoma 2                                                | -2.13 | 0.03334  | -1.1  | 0.77085 |
| <b>DST</b>          | dystonin                                                             | -2.13 | 0.01481  | -1.17 | 0.55258 |
| <b>BACE1</b>        | beta-site APP-cleaving enzyme 1                                      | -2.13 | 0.02133  | -1.41 | 0.24932 |
| <b>AA825721</b>     | ---                                                                  | -2.13 | 0.01918  | 1.04  | 0.88351 |
| <b>ITGA3</b>        | integrin, alpha 3 (antigen CD49C, alpha 3 subunit of VLA-3 receptor) | -2.13 | 0.00489  | -1.33 | 0.21263 |
| <b>PARPBP</b>       | PARP1 binding protein                                                | -2.13 | 0.02254  | -1.29 | 0.3817  |
| <b>CSNK1E</b>       | casein kinase 1, epsilon                                             | -2.13 | 0.00075  | -1.26 | 0.17844 |
| <b>PVR</b>          | poliovirus receptor                                                  | -2.12 | 0.00169  | -1.3  | 0.17956 |
| <b>AK094711</b>     | ---                                                                  | -2.12 | 0.01695  | 1.23  | 0.44773 |
| <b>TOP2A</b>        | topoisomerase (DNA) II alpha 170kDa                                  | -2.12 | 0.00545  | -1.28 | 0.27155 |
| <b>S100A13</b>      | S100 calcium binding protein A13                                     | -2.12 | 0.0352   | -1.26 | 0.46861 |
| <b>AA861608</b>     | ---                                                                  | -2.12 | 0.00044  | -1.21 | 0.23625 |
| <b>RBM11</b>        | RNA binding motif protein 11                                         | -2.12 | 0.03091  | -1.29 | 0.42476 |
| <b>MTSS1</b>        | metastasis suppressor 1                                              | -2.12 | 0.02179  | -1.14 | 0.65932 |
| <b>ACER3</b>        | alkaline ceramidase 3                                                | -2.12 | 0.00174  | -1.35 | 0.12654 |
| <b>EFEMP2</b>       | EGF containing fibulin-like extracellular matrix protein 2           | -2.12 | 0.0274   | 1     | 0.99424 |
| <b>CC2D2A</b>       | coiled-coil and C2 domain containing 2A                              | -2.12 | 0.04185  | -1.91 | 0.07349 |
| <b>JDP2</b>         | Jun dimerization protein 2                                           | -2.12 | 0.01512  | -1.22 | 0.46319 |
| <b>SLC35F2</b>      | solute carrier family 35, member F2                                  | -2.12 | 6.00E-04 | 1.31  | 0.11413 |
| <b>PEX13</b>        | peroxisomal biogenesis factor 13                                     | -2.12 | 0.02168  | -1.08 | 0.79611 |
| <b>AA532745</b>     | ---                                                                  | -2.12 | 0.00979  | -1.81 | 0.0313  |
| <b>ADRB2</b>        | adrenoceptor beta 2, surface                                         | -2.12 | 0.03602  | -1.35 | 0.35892 |
| <b>NUP155</b>       | nucleoporin 155kDa                                                   | -2.12 | 0.00081  | 1.1   | 0.57927 |
| <b>NM_024853</b>    | ---                                                                  | -2.12 | 0.03494  | -1.03 | 0.9377  |
| <b>C4orf46</b>      | chromosome 4 open reading frame 46                                   | -2.12 | 0.00087  | -1.3  | 0.13945 |
| <b>CBLB</b>         | Cbl proto-oncogene, E3 ubiquitin protein ligase B                    | -2.11 | 0.00998  | -1.08 | 0.76557 |
| <b>A1356405</b>     | ---                                                                  | -2.11 | 0.03733  | -1.28 | 0.44278 |
| <b>LOC283278</b>    | uncharacterized LOC283278                                            | -2.11 | 0.0027   | -1.13 | 0.5417  |
| <b>TJP2</b>         | tight junction protein 2 (zona occludens 2)                          | -2.11 | 0.01622  | 1.23  | 0.43917 |
| <b>UACA</b>         | uveal autoantigen with coiled-coil domains and ankyrin repeats       | -2.11 | 0.00398  | -1.32 | 0.19649 |
| <b>A1300571</b>     | ---                                                                  | -2.11 | 0.04021  | -1.95 | 0.06234 |
| <b>TTC39C</b>       | tetratricopeptide repeat domain 39C                                  | -2.11 | 0.04239  | -1.48 | 0.24892 |
| <b>ATP2A1</b>       | ATPase, Ca++ transporting, cardiac muscle, fast twitch 1             | -2.11 | 0.04682  | 1.08  | 0.81904 |
| <b>EPHA5</b>        | EPH receptor A5                                                      | -2.11 | 0.01668  | -1.04 | 0.8906  |
| <b>TRAF3IP2-AS1</b> | TRAF3IP2 antisense RNA 1 (non-protein coding)                        | -2.11 | 0.00039  | -1.44 | 0.02909 |
| <b>WARS</b>         | tryptophanyl-tRNA synthetase                                         | -2.11 | 0.03212  | 1.23  | 0.5037  |
| <b>NRIP3</b>        | nuclear receptor interacting protein 3                               | -2.11 | 0.01216  | -1.09 | 0.72272 |
| <b>MFAP3</b>        | microfibrillar-associated protein 3                                  | -2.11 | 0.04492  | -1.3  | 0.43557 |
| <b>LOC100130357</b> | uncharacterized LOC100130357                                         | -2.11 | 0.00492  | 1.07  | 0.76912 |
| <b>RGS2</b>         | regulator of G-protein signaling 2, 24kDa                            | -2.11 | 0.02556  | 1.22  | 0.50575 |
| <b>GPN3</b>         | GPN-loop GTPase 3                                                    | -2.11 | 0.04951  | 1.48  | 0.26851 |
| <b>IKBIP</b>        | IKBKB interacting protein                                            | -2.11 | 0.01915  | -1.17 | 0.57842 |
| <b>ADCY1</b>        | adenylate cyclase 1 (brain)                                          | -2.10 | 0.02722  | 1.07  | 0.81966 |

|                     |                                                                                          |       |          |       |         |
|---------------------|------------------------------------------------------------------------------------------|-------|----------|-------|---------|
| <b>TMEM5</b>        | transmembrane protein 5                                                                  | -2.10 | 0.03205  | -1.52 | 0.19151 |
| <b>AK4</b>          | adenylate kinase 4                                                                       | -2.10 | 0.00485  | 1.11  | 0.63144 |
| <b>ALG14</b>        | asparagine-linked glycosylation 14 homolog (S. cerevisiae)                               | -2.10 | 0.02983  | -1.57 | 0.15398 |
| <b>WDR5</b>         | WD repeat domain 5                                                                       | -2.10 | 0.03197  | -1.11 | 0.73922 |
| <b>LOC100505880</b> | uncharacterized LOC100505880                                                             | -2.10 | 0.00269  | 1.1   | 0.62417 |
| <b>METTL1</b>       | methyltransferase like 1                                                                 | -2.10 | 0.00493  | -1.05 | 0.80711 |
| <b>HELLS</b>        | helicase, lymphoid-specific                                                              | -2.10 | 0.00621  | 1.12  | 0.61808 |
| <b>FANCD2</b>       | Fanconi anemia, complementation group D2                                                 | -2.10 | 0.01249  | -1.09 | 0.72181 |
| <b>FZD7</b>         | frizzled family receptor 7                                                               | -2.10 | 0.02181  | -1.17 | 0.5862  |
| <b>CNKS2</b>        | connector enhancer of kinase suppressor of Ras 2                                         | -2.10 | 0.04231  | 1.38  | 0.33922 |
| <b>YWHAZ</b>        | tyrosine 3-monooxygenase/tryptophan 5-monooxygenase activation protein, zeta polypeptide | -2.10 | 0.00407  | -1.34 | 0.17698 |
| <b>AI286239</b>     | ---                                                                                      | -2.10 | 0.0135   | -1.45 | 0.16327 |
| <b>TRIL</b>         | TLR4 interactor with leucine-rich repeats                                                | -2.09 | 0.00287  | 1.19  | 0.38747 |
| <b>AW779917</b>     | ---                                                                                      | -2.09 | 0.00244  | -1.55 | 0.0382  |
| <b>LOC100128653</b> | uncharacterized LOC100128653                                                             | -2.09 | 0.00161  | -1.23 | 0.26237 |
| <b>SLC16A7</b>      | solute carrier family 16, member 7 (monocarboxylic acid transporter 2)                   | -2.09 | 0.00426  | -1.08 | 0.72202 |
| <b>ENOSF1</b>       | enolase superfamily member 1                                                             | -2.09 | 0.00308  | 1.1   | 0.61494 |
| <b>NEURL1B</b>      | neuralized homolog 1B (Drosophila)                                                       | -2.09 | 0.02728  | 1.24  | 0.46796 |
| <b>FAM131B</b>      | family with sequence similarity 131, member B                                            | -2.09 | 0.00325  | -1.07 | 0.71885 |
| <b>DDX18</b>        | DEAD (Asp-Glu-Ala-Asp) box polypeptide 18                                                | -2.09 | 1.00E-04 | -1.87 | 0.00038 |
| <b>SIX4</b>         | SIX homeobox 4                                                                           | -2.09 | 0.00031  | -1.17 | 0.27764 |
| <b>NMNAT1</b>       | nicotinamide nucleotide adenyltransferase 1                                              | -2.09 | 0.04481  | -1.39 | 0.3366  |
| <b>ETS1</b>         | v-ets erythroblastosis virus E26 oncogene homolog 1 (avian)                              | -2.09 | 0.0024   | -1.17 | 0.40876 |
| <b>PRR11</b>        | proline rich 11                                                                          | -2.09 | 0.00017  | -1.56 | 0.00618 |
| <b>ARHGEF39</b>     | Rho guanine nucleotide exchange factor (GEF) 39                                          | -2.09 | 0.03228  | -1.14 | 0.67624 |
| <b>TOR3A</b>        | torsin family 3, member A                                                                | -2.09 | 0.01209  | -1.16 | 0.54897 |
| <b>CSPG5</b>        | chondroitin sulfate proteoglycan 5 (neuroglycan C)                                       | -2.09 | 0.04667  | 1.7   | 0.13319 |
| <b>NCAPD2</b>       | non-SMC condensin I complex, subunit D2                                                  | -2.09 | 0.02831  | -1.31 | 0.3657  |
| <b>OGT</b>          | O-linked N-acetylglucosamine (GlcNAc) transferase                                        | -2.09 | 0.01695  | -1.49 | 0.15551 |
| <b>ITPRIP</b>       | inositol 1,4,5-trisphosphate receptor interacting protein                                | -2.09 | 0.00459  | -1.07 | 0.73413 |
| <b>ZSCAN12P1</b>    | zinc finger and SCAN domain containing 12 pseudogene 1                                   | -2.09 | 0.01342  | 1.03  | 0.9222  |
| <b>ARHGEF2</b>      | Rho/Rac guanine nucleotide exchange factor (GEF) 2                                       | -2.08 | 0.01164  | 1.05  | 0.82975 |
| <b>TBCE</b>         | tubulin folding cofactor E                                                               | -2.08 | 9.00E-04 | -1.55 | 0.01994 |
| <b>WWC2</b>         | WW and C2 domain containing 2                                                            | -2.08 | 0.02987  | -1.91 | 0.04991 |
| <b>NCEH1</b>        | neutral cholesterol ester hydrolase 1                                                    | -2.08 | 0.00352  | -1.83 | 0.01074 |
| <b>MCOLN2</b>       | mucolipin 2                                                                              | -2.08 | 0.00296  | -1.07 | 0.72433 |
| <b>NR4A1</b>        | nuclear receptor subfamily 4, group A, member 1                                          | -2.08 | 7.00E-05 | 1.06  | 0.63157 |
| <b>APOC1</b>        | apolipoprotein C-I                                                                       | -2.08 | 0.0031   | -1.11 | 0.58266 |
| <b>MPP6</b>         | membrane protein, palmitoylated 6 (MAGUK p55 subfamily member 6)                         | -2.08 | 0.00045  | -1.34 | 0.07265 |
| <b>RECQL4</b>       | RecQ protein-like 4                                                                      | -2.08 | 0.04024  | 1.01  | 0.98139 |
| <b>AUNIP</b>        | aurora kinase A and ninein interacting protein                                           | -2.08 | 0.02833  | -1.19 | 0.55395 |
| <b>GLT8D1</b>       | Glycosyltransferase 8 domain containing 1                                                | -2.08 | 0.03698  | -1.03 | 0.93728 |
| <b>LOC100289092</b> | uncharacterized LOC100289092                                                             | -2.08 | 0.02825  | 1.1   | 0.75448 |

|                  |                                                                              |       |          |       |         |
|------------------|------------------------------------------------------------------------------|-------|----------|-------|---------|
| <b>STRN</b>      | striatin, calmodulin binding protein                                         | -2.08 | 0.00099  | -1.47 | 0.03665 |
| <b>G3BP2</b>     | GTPase activating protein (SH3 domain) binding protein 2                     | -2.08 | 0.02488  | -1.26 | 0.42408 |
| <b>ERGIC2</b>    | ERGIC and golgi 2                                                            | -2.08 | 0.01276  | -1.91 | 0.02396 |
| <b>OSBPL6</b>    | oxysterol binding protein-like 6                                             | -2.08 | 0.00057  | 1.09  | 0.57641 |
| <b>ETFA</b>      | electron-transfer-flavoprotein, alpha polypeptide                            | -2.08 | 0.00011  | -1.95 | 0.00023 |
| <b>BF515158</b>  | ---                                                                          | -2.08 | 0.00054  | -1.3  | 0.10931 |
| <b>EIF1AX</b>    | eukaryotic translation initiation factor 1A, X-linked                        | -2.08 | 0.03204  | 1.05  | 0.85947 |
| <b>CHST1</b>     | carbohydrate (keratan sulfate Gal-6) sulfotransferase 1                      | -2.08 | 0.0052   | 1.1   | 0.66153 |
| <b>BICC1</b>     | bicaudal C homolog 1 (Drosophila)                                            | -2.08 | 0.02366  | 1.12  | 0.68087 |
| <b>LINC00669</b> | long intergenic non-protein coding RNA 669                                   | -2.08 | 0.00229  | -1.04 | 0.81659 |
| <b>TEAD1</b>     | TEA domain family member 1 (SV40 transcriptional enhancer factor)            | -2.07 | 0.00388  | -1.04 | 0.83987 |
| <b>NFE2L3</b>    | nuclear factor (erythroid-derived 2)-like 3                                  | -2.07 | 0.00518  | 1.05  | 0.83404 |
| <b>GZMB</b>      | granzyme B (granzyme 2, cytotoxic T-lymphocyte-associated serine esterase 1) | -2.07 | 1.00E-04 | -1.01 | 0.91354 |
| <b>TRIM14</b>    | tripartite motif containing 14                                               | -2.07 | 0.0415   | 1.26  | 0.47306 |
| <b>SDC2</b>      | syndecan 2                                                                   | -2.07 | 0.00019  | 1.09  | 0.51334 |
| <b>WDR67</b>     | WD repeat domain 67                                                          | -2.07 | 0.00094  | -1.03 | 0.84153 |
| <b>PPIH</b>      | peptidylprolyl isomerase H (cyclophilin H)                                   | -2.07 | 0.02623  | -1.04 | 0.88104 |
| <b>CHN1</b>      | chimerin (chimaerin) 1                                                       | -2.07 | 0.00667  | 1.26  | 0.3083  |
| <b>SLC25A45</b>  | solute carrier family 25, member 45                                          | -2.07 | 0.01745  | 1.71  | 0.06179 |
| <b>ERP29</b>     | endoplasmic reticulum protein 29                                             | -2.07 | 6.00E-05 | -1.87 | 0.00021 |
| <b>SRPX2</b>     | sushi-repeat containing protein, X-linked 2                                  | -2.07 | 0.00409  | -1.65 | 0.0292  |
| <b>FEM1B</b>     | fem-1 homolog b (C. elegans)                                                 | -2.07 | 0.02164  | -1.32 | 0.32656 |
| <b>EML4</b>      | echinoderm microtubule associated protein like 4                             | -2.07 | 0.0045   | -1.19 | 0.41811 |
| <b>RASSF8</b>    | Ras association (RalGDS/AF-6) domain family (N-terminal) member 8            | -2.07 | 0.02099  | -1.06 | 0.83329 |
| <b>EPHA2</b>     | EPH receptor A2                                                              | -2.07 | 0.00177  | 1.06  | 0.72688 |
| <b>ASPM</b>      | asp (abnormal spindle) homolog, microcephaly associated (Drosophila)         | -2.07 | 0.00797  | -1.69 | 0.03836 |
| <b>SF3B3</b>     | splicing factor 3b, subunit 3, 130kDa                                        | -2.06 | 0.02853  | -1.1  | 0.73432 |
| <b>ZNF263</b>    | zinc finger protein 263                                                      | -2.06 | 0.04543  | -1.47 | 0.25046 |
| <b>TBC1D16</b>   | TBC1 domain family, member 16                                                | -2.06 | 0.00465  | -1.9  | 0.00963 |
| <b>ZBTB9</b>     | zinc finger and BTB domain containing 9                                      | -2.06 | 0.03688  | -1.2  | 0.56096 |
| <b>MCM3</b>      | minichromosome maintenance complex component 3                               | -2.06 | 0.0169   | 1.06  | 0.81579 |
| <b>AA088388</b>  | ---                                                                          | -2.06 | 0.01107  | 1.11  | 0.66161 |
| <b>ZNF385C</b>   | zinc finger protein 385C                                                     | -2.06 | 0.02141  | -1.1  | 0.73741 |
| <b>PEX10</b>     | peroxisomal biogenesis factor 10                                             | -2.06 | 0.03359  | -1.33 | 0.35871 |
| <b>DIAPH3</b>    | diaphanous homolog 3 (Drosophila)                                            | -2.06 | 0.02926  | -1.02 | 0.93635 |
| <b>DHX8</b>      | DEAH (Asp-Glu-Ala-His) box polypeptide 8                                     | -2.06 | 0.01829  | -1.74 | 0.05665 |
| <b>SH3BP5</b>    | SH3-domain binding protein 5 (BTK-associated)                                | -2.06 | 0.00039  | -1.04 | 0.78127 |
| <b>ELMO1</b>     | engulfment and cell motility 1                                               | -2.06 | 0.00336  | -1.05 | 0.81557 |
| <b>ARTN</b>      | artemin                                                                      | -2.06 | 0.00453  | -1.27 | 0.25824 |
| <b>FAM198B</b>   | family with sequence similarity 198, member B                                | -2.06 | 0.00012  | 1.12  | 0.37748 |
| <b>RPE</b>       | ribulose-5-phosphate-3-epimerase                                             | -2.06 | 0.00109  | -1.33 | 0.11126 |
| <b>CPD</b>       | carboxypeptidase D                                                           | -2.06 | 0.00087  | -1.11 | 0.51506 |
| <b>SMYD5</b>     | SMYD family member 5                                                         | -2.06 | 0.04089  | -1.9  | 0.06403 |
| <b>ARL5A</b>     | ADP-ribosylation factor-like 5A                                              | -2.06 | 0.0119   | -1.3  | 0.29514 |
| <b>EIF1</b>      | eukaryotic translation initiation factor 1                                   | -2.06 | 0.00275  | -1.14 | 0.50123 |
| <b>ZEB1-AS1</b>  | ZEB1 antisense RNA 1 (non-protein coding)                                    | -2.06 | 0.04228  | -1.2  | 0.56652 |



|                  |                                                                                                 |       |         |       |         |
|------------------|-------------------------------------------------------------------------------------------------|-------|---------|-------|---------|
| <b>TNFRSF11A</b> | tumor necrosis factor receptor superfamily, member 11a, NFkB activator                          | -2.06 | 0.02594 | 1.26  | 0.42857 |
| <b>THNSL2</b>    | threonine synthase-like 2 ( <i>S. cerevisiae</i> )                                              | -2.06 | 0.00108 | -1.04 | 0.7973  |
| <b>ACLY</b>      | ATP citrate lyase                                                                               | -2.05 | 0.00024 | -1.02 | 0.90364 |
| <b>LOC389641</b> | uncharacterized LOC389641                                                                       | -2.05 | 0.01517 | 1.05  | 0.84144 |
| <b>HSF2BP</b>    | heat shock transcription factor 2 binding protein                                               | -2.05 | 0.01388 | -1.04 | 0.88789 |
| <b>CENPN</b>     | centromere protein N                                                                            | -2.05 | 0.00782 | -1.14 | 0.57236 |
| <b>ITPRIPL2</b>  | inositol 1,4,5-trisphosphate receptor interacting protein-like 2                                | -2.05 | 0.0014  | 1.07  | 0.68963 |
| <b>AA026390</b>  | ---                                                                                             | -2.05 | 0.00039 | -1.06 | 0.70233 |
| <b>NCBP2</b>     | nuclear cap binding protein subunit 2, 20kDa                                                    | -2.05 | 0.02411 | -1.43 | 0.21531 |
| <b>SNRPB</b>     | small nuclear ribonucleoprotein polypeptides B and B1                                           | -2.05 | 0.0381  | -1.33 | 0.36939 |
| <b>DSN1</b>      | DSN1, MIND kinetochore complex component, homolog ( <i>S. cerevisiae</i> )                      | -2.05 | 0.02104 | -1.05 | 0.87008 |
| <b>SSFA2</b>     | sperm specific antigen 2                                                                        | -2.05 | 0.03658 | -1.42 | 0.27024 |
| <b>FAM3C</b>     | family with sequence similarity 3, member C                                                     | -2.05 | 0.01    | -1.25 | 0.34797 |
| <b>AA213799</b>  | ---                                                                                             | -2.05 | 0.01688 | 1.01  | 0.95778 |
| <b>GPR37</b>     | G protein-coupled receptor 37 (endothelin receptor type B-like)                                 | -2.05 | 0.00053 | -1.19 | 0.26906 |
| <b>BBIP1</b>     | BBSome interacting protein 1                                                                    | -2.05 | 0.04477 | -1.02 | 0.96111 |
| <b>EGR3</b>      | early growth response 3                                                                         | -2.05 | 0.00916 | -1.01 | 0.95385 |
| <b>WHSC1</b>     | Wolf-Hirschhorn syndrome candidate 1                                                            | -2.05 | 0.04454 | -1.13 | 0.69595 |
| <b>ZDHHC23</b>   | zinc finger, DHHC-type containing 23                                                            | -2.05 | 0.00567 | 1.07  | 0.7429  |
| <b>PSD3</b>      | pleckstrin and Sec7 domain containing 3                                                         | -2.05 | 0.0173  | 1.15  | 0.59378 |
| <b>CDRT1</b>     | CMT1A duplicated region transcript 1                                                            | -2.04 | 0.00933 | 1.01  | 0.97279 |
| <b>RHOA</b>      | ras homolog family member A                                                                     | -2.04 | 0.03555 | -1.25 | 0.46985 |
| <b>LINC00184</b> | long intergenic non-protein coding RNA 184                                                      | -2.04 | 0.04128 | -1.23 | 0.52202 |
| <b>ASIC1</b>     | acid-sensing (proton-gated) ion channel 1                                                       | -2.04 | 0.00991 | 1.19  | 0.46583 |
| <b>DDX11L2</b>   | DEAD/H (Asp-Glu-Ala-Asp/His) box helicase 11 like 2                                             | -2.04 | 0.04299 | -1.13 | 0.7063  |
| <b>EML6</b>      | echinoderm microtubule associated protein like 6                                                | -2.04 | 0.01769 | 1.49  | 0.14757 |
| <b>F3</b>        | coagulation factor III (thromboplastin, tissue factor)                                          | -2.04 | 0.00206 | 1.09  | 0.62391 |
| <b>SP110</b>     | SP110 nuclear body protein                                                                      | -2.04 | 0.03737 | 1.04  | 0.89555 |
| <b>CLPB</b>      | ClpB caseinolytic peptidase B homolog ( <i>E. coli</i> )                                        | -2.04 | 0.02817 | -1.22 | 0.49816 |
| <b>COMMMD10</b>  | COMM domain containing 10                                                                       | -2.04 | 0.00911 | -1.59 | 0.06484 |
| <b>FAM49A</b>    | family with sequence similarity 49, member A                                                    | -2.04 | 0.00519 | -1.05 | 0.82492 |
| <b>PARP1</b>     | poly (ADP-ribose) polymerase 1                                                                  | -2.04 | 0.00028 | -1.27 | 0.09999 |
| <b>SERINC2</b>   | serine incorporator 2                                                                           | -2.04 | 0.0145  | 1.1   | 0.71506 |
| <b>MTBP</b>      | Mdm2, transformed 3T3 cell double minute 2, p53 binding protein (mouse) binding protein, 104kDa | -2.04 | 0.00798 | -1.23 | 0.35576 |
| <b>AA601997</b>  | ---                                                                                             | -2.04 | 0.02956 | 1.06  | 0.85235 |
| <b>SRP72</b>     | signal recognition particle 72kDa                                                               | -2.04 | 0.00062 | -1.48 | 0.02407 |
| <b>AF070618</b>  | ---                                                                                             | -2.04 | 0.04162 | -1.57 | 0.17052 |
| <b>HIST1H4F</b>  | histone cluster 1, H4f                                                                          | -2.03 | 0.00567 | -1.49 | 0.0779  |
| <b>GFI1</b>      | growth factor independent 1 transcription repressor                                             | -2.03 | 0.00676 | 1.84  | 0.01521 |
| <b>KLF4</b>      | Kruppel-like factor 4 (gut)                                                                     | -2.03 | 0.03448 | 1.36  | 0.3129  |
| <b>GPR125</b>    | G protein-coupled receptor 125                                                                  | -2.03 | 0.03642 | 1.3   | 0.39706 |
| <b>SYNCRIP</b>   | synaptotagmin binding, cytoplasmic RNA interacting protein                                      | -2.03 | 0.0199  | -1.47 | 0.16585 |
| <b>HAUS8</b>     | HAUS augmin-like complex, subunit 8                                                             | -2.03 | 0.03245 | -1.03 | 0.9241  |

|                   |                                                                                 |       |         |       |         |
|-------------------|---------------------------------------------------------------------------------|-------|---------|-------|---------|
| <b>KIAA1958</b>   | KIAA1958                                                                        | -2.03 | 0.02018 | -1.18 | 0.53279 |
| <b>TPM3</b>       | tropomyosin 3                                                                   | -2.03 | 0.02308 | -1.1  | 0.73508 |
| <b>GALC</b>       | galactosylceramidase                                                            | -2.03 | 0.00849 | -1.09 | 0.7058  |
| <b>STIL</b>       | SCL/TAL1 interrupting locus                                                     | -2.03 | 0.01191 | -1.04 | 0.86449 |
| <b>HS3ST1</b>     | heparan sulfate (glucosamine) 3-O-sulfotransferase 1                            | -2.03 | 0.01363 | 1.09  | 0.73021 |
| <b>ELP5</b>       | elongator acetyltransferase complex subunit 5                                   | -2.03 | 0.01955 | -1.35 | 0.26387 |
| <b>SYS1</b>       | SYS1 Golgi-localized integral membrane protein homolog ( <i>S. cerevisiae</i> ) | -2.03 | 0.00314 | -1.33 | 0.15102 |
| <b>URI1</b>       | URI1, prefoldin-like chaperone                                                  | -2.03 | 0.01291 | -1.57 | 0.0854  |
| <b>NOL7</b>       | nucleolar protein 7, 27kDa                                                      | -2.03 | 0.03974 | -1.63 | 0.13478 |
| <b>ITGA1</b>      | integrin, alpha 1                                                               | -2.03 | 0.01548 | 1.08  | 0.75614 |
| <b>WDR25</b>      | WD repeat domain 25                                                             | -2.03 | 0.04827 | 1.04  | 0.89944 |
| <b>AI382026</b>   | ---                                                                             | -2.03 | 0.00126 | -1.01 | 0.93655 |
| <b>STAMPB</b>     | STAM binding protein                                                            | -2.03 | 0.04001 | -1.59 | 0.15265 |
| <b>MFAP5 *</b>    | microfibrillar associated protein 5                                             | -2.03 | 0.01464 | 2.41  | 0.00118 |
| <b>C19orf24</b>   | chromosome 19 open reading frame 24                                             | -2.03 | 0.0084  | -1.86 | 0.01687 |
| <b>MPP1</b>       | membrane protein, palmitoylated 1, 55kDa                                        | -2.02 | 0.00204 | 1.05  | 0.77192 |
| <b>PCSK6</b>      | proprotein convertase subtilisin/kexin type 6                                   | -2.02 | 0.02436 | -1.55 | 0.1328  |
| <b>PPAN</b>       | peter pan homolog ( <i>Drosophila</i> )                                         | -2.02 | 0.03712 | -1.17 | 0.60591 |
| <b>IL21R</b>      | interleukin 21 receptor                                                         | -2.02 | 0.00279 | -1.02 | 0.92278 |
| <b>C20orf112</b>  | chromosome 20 open reading frame 112                                            | -2.02 | 0.04396 | -1.41 | 0.28462 |
| <b>EMC1</b>       | ER membrane protein complex subunit 1                                           | -2.02 | 0.00019 | -1.65 | 0.00226 |
| <b>ERLIN2</b>     | ER lipid raft associated 2                                                      | -2.02 | 0.02035 | -1.66 | 0.07512 |
| <b>UCA1</b>       | urothelial cancer associated 1 (non-protein coding)                             | -2.02 | 0.00278 | 1.68  | 0.01566 |
| <b>FAM167A</b>    | family with sequence similarity 167, member A                                   | -2.02 | 0.0128  | 1.7   | 0.04469 |
| <b>MBTPS2</b>     | membrane-bound transcription factor peptidase, site 2                           | -2.02 | 0.00384 | -1.47 | 0.06765 |
| <b>TLN2</b>       | talin 2                                                                         | -2.01 | 0.04812 | -1.12 | 0.72476 |
| <b>DLGAP1-AS1</b> | DLGAP1 antisense RNA 1                                                          | -2.01 | 0.00014 | -1.3  | 0.05454 |
| <b>CDC25A</b>     | cell division cycle 25 homolog A ( <i>S. pombe</i> )                            | -2.01 | 0.03937 | 1.97  | 0.04454 |
| <b>G2E3</b>       | G2/M-phase specific E3 ubiquitin protein ligase                                 | -2.01 | 0.02372 | -1.74 | 0.06243 |
| <b>B3GNT5</b>     | UDP-GlcNAc:betaGal beta-1,3-N-acetylglucosaminyltransferase 5                   | -2.01 | 0.00479 | 1.07  | 0.75068 |
| <b>ITGB5</b>      | integrin, beta 5                                                                | -2.01 | 0.03345 | 1.54  | 0.15914 |
| <b>DERL1</b>      | derlin 1                                                                        | -2.01 | 0.00076 | -1.63 | 0.00775 |
| <b>FAM100B</b>    | family with sequence similarity 100, member B                                   | -2.01 | 0.00195 | -1.3  | 0.15831 |
| <b>LZIC</b>       | leucine zipper and CTNNBIP1 domain containing                                   | -2.01 | 0.00122 | -1.27 | 0.16251 |
| <b>PAQR8</b>      | progesterin and adipoQ receptor family member VIII                              | -2.01 | 0.03285 | 1.23  | 0.48066 |
| <b>NPM3</b>       | nucleophosmin/nucleoplasmin 3                                                   | -2.01 | 0.00211 | -1.1  | 0.59068 |
| <b>MAOA</b>       | monoamine oxidase A                                                             | -2.01 | 0.01365 | 1.01  | 0.95531 |
| <b>GPATCH2L</b>   | G patch domain containing 2-like                                                | -2.01 | 0.01497 | -1.18 | 0.50247 |
| <b>BE742377</b>   | ---                                                                             | -2.01 | 0.00467 | -1.5  | 0.06284 |
| <b>TBC1D9B</b>    | TBC1 domain family, member 9B (with GRAM domain)                                | -2.01 | 0.01225 | -1.66 | 0.05114 |
| <b>CCDC68</b>     | coiled-coil domain containing 68                                                | -2.01 | 0.00297 | -1.02 | 0.92354 |
| <b>ASPHD2</b>     | aspartate beta-hydroxylase domain containing 2                                  | -2.01 | 0.00241 | 1.1   | 0.58007 |
| <b>BC016787</b>   | ---                                                                             | -2.01 | 0.00466 | -1.76 | 0.01475 |
| <b>NEDD9</b>      | neural precursor cell expressed, developmentally down-regulated 9               | -2.01 | 0.02511 | -1.09 | 0.74749 |
| <b>CHST7</b>      | carbohydrate (N-acetylglucosamine 6-O) sulfotransferase 7                       | -2.01 | 0.03377 | 1.32  | 0.35605 |

|                     |                                                                                                   |       |          |       |         |
|---------------------|---------------------------------------------------------------------------------------------------|-------|----------|-------|---------|
| <b>PLCL2</b>        | phospholipase C-like 2                                                                            | -2.01 | 0.00163  | -1.21 | 0.27202 |
| <b>SNAI1</b>        | snail homolog 1 (Drosophila)                                                                      | -2.01 | 0.00233  | -1.24 | 0.24799 |
| <b>TMEM64</b>       | transmembrane protein 64                                                                          | -2.01 | 0.01925  | -1.5  | 0.13482 |
| <b>PPP2R2C</b>      | protein phosphatase 2, regulatory subunit B, gamma                                                | -2.01 | 0.00452  | 1.81  | 0.01133 |
| <b>GLA</b>          | galactosidase, alpha                                                                              | -2.00 | 0.007    | -1.17 | 0.4602  |
| <b>BIN1</b>         | bridging integrator 1                                                                             | -2.00 | 0.04147  | -1.5  | 0.20228 |
| <b>AI679555</b>     | ---                                                                                               | -2.00 | 5.00E-04 | 1.01  | 0.93089 |
| <b>RRBP1</b>        | ribosome binding protein 1 homolog 180kDa (dog)                                                   | -2.00 | 0.00888  | -1.61 | 0.05157 |
| <b>MSH5</b>         | mutS homolog 5 (E. coli)                                                                          | -2.00 | 0.01466  | -1.31 | 0.28384 |
| <b>BF003032</b>     | ---                                                                                               | -2.00 | 0.00325  | 1.19  | 0.36197 |
| <b>LPCAT4</b>       | lysophosphatidylcholine acyltransferase 4                                                         | -2.00 | 0.00768  | 1.3   | 0.24687 |
| <b>TNFRSF10A</b>    | tumor necrosis factor receptor superfamily, member 10a                                            | -2.00 | 0.0172   | 1.07  | 0.79329 |
| <b>UST</b>          | uronyl-2-sulfotransferase                                                                         | -2.00 | 0.01024  | 1.14  | 0.55528 |
| <b>PRKAG2</b>       | protein kinase, AMP-activated, gamma 2 non-catalytic subunit                                      | -2.00 | 0.03961  | -1.66 | 0.11467 |
| <b>FGF13-AS1</b>    | FGF13 antisense RNA 1                                                                             | 2.00  | 0.01298  | 1.1   | 0.68338 |
| <b>N4BP2L1</b>      | NEDD4 binding protein 2-like 1                                                                    | 2.00  | 0.00501  | 1.29  | 0.22239 |
| <b>SMARCE1</b>      | SWI/SNF related, matrix associated, actin dependent regulator of chromatin, subfamily e, member 1 | 2.00  | 0.01735  | 1.75  | 0.04514 |
| <b>ABLIM2</b>       | actin binding LIM protein family, member 2                                                        | 2.00  | 0.00122  | -1.22 | 0.24204 |
| <b>AI003508</b>     | ---                                                                                               | 2.00  | 0.02093  | -1.02 | 0.93765 |
| <b>ANKRD65</b>      | ankyrin repeat domain 65                                                                          | 2.00  | 0.00034  | 1.08  | 0.5582  |
| <b>VPS13D</b>       | Vacuolar protein sorting 13 homolog D (S. cerevisiae)                                             | 2.00  | 0.00037  | 1.03  | 0.83058 |
| <b>AU144961</b>     | ---                                                                                               | 2.00  | 0.00069  | 1.21  | 0.21481 |
| <b>C10orf116</b>    | chromosome 10 open reading frame 116                                                              | 2.01  | 0.00478  | -1.01 | 0.95032 |
| <b>MKRN1</b>        | makorin ring finger protein 1                                                                     | 2.01  | 0.00893  | 1.36  | 0.19071 |
| <b>AA195276</b>     | ---                                                                                               | 2.01  | 0.0154   | -1.02 | 0.92461 |
| <b>AI832594</b>     | ---                                                                                               | 2.01  | 0.02789  | 1.29  | 0.36881 |
| <b>CCDC102B</b>     | coiled-coil domain containing 102B                                                                | 2.01  | 0.01925  | -1.04 | 0.89214 |
| <b>ACP5</b>         | acid phosphatase 5, tartrate resistant                                                            | 2.01  | 0.02793  | -1.1  | 0.74457 |
| <b>AU147291</b>     | ---                                                                                               | 2.01  | 0.03791  | -1.09 | 0.77455 |
| <b>WDR77</b>        | WD repeat domain 77                                                                               | 2.01  | 0.00308  | 1.11  | 0.57488 |
| <b>HIST1H2AG</b>    | histone cluster 1, H2ag                                                                           | 2.01  | 0.00181  | 1.88  | 0.00359 |
| <b>AI761498</b>     | ---                                                                                               | 2.01  | 0.00618  | 1.09  | 0.69168 |
| <b>LOC158960</b>    | uncharacterized protein BC009467                                                                  | 2.02  | 0.00023  | -1.04 | 0.76944 |
| <b>PIK3CB</b>       | phosphoinositide-3-kinase, catalytic, beta polypeptide                                            | 2.02  | 0.04169  | 1.08  | 0.81566 |
| <b>NUDT14</b>       | nudix (nucleoside diphosphate linked moiety X)-type motif 14                                      | 2.02  | 0.00882  | -1.27 | 0.29956 |
| <b>AK096998</b>     | ---                                                                                               | 2.03  | 0.00068  | -1.01 | 0.95586 |
| <b>PCDHB9</b>       | protocadherin beta 9                                                                              | 2.03  | 0.00476  | 1.28  | 0.23385 |
| <b>CD24</b>         | CD24 molecule                                                                                     | 2.03  | 0.00102  | 1.04  | 0.82659 |
| <b>ABHD12</b>       | abhydrolase domain containing 12                                                                  | 2.03  | 0.00054  | -1.38 | 0.04816 |
| <b>FAM168A</b>      | family with sequence similarity 168, member A                                                     | 2.03  | 0.00078  | 1.5   | 0.02156 |
| <b>CREG2</b>        | cellular repressor of E1A-stimulated genes 2                                                      | 2.03  | 0.02738  | 1.17  | 0.57582 |
| <b>LOC100996455</b> | uncharacterized LOC100996455                                                                      | 2.03  | 0.01343  | -1.03 | 0.91661 |
| <b>COBL1</b>        | COBL-like 1                                                                                       | 2.03  | 0.00461  | 1.21  | 0.3618  |
| <b>AL138240</b>     | ---                                                                                               | 2.03  | 0.00219  | -1.2  | 0.31961 |
| <b>HOXA10</b>       | homeobox A10                                                                                      | 2.04  | 0.00012  | 1.38  | 0.02153 |

|                  |                                                                           |      |          |       |         |
|------------------|---------------------------------------------------------------------------|------|----------|-------|---------|
| <b>FKBP3</b>     | FK506 binding protein 3, 25kDa                                            | 2.04 | 0.00427  | 1.35  | 0.15381 |
| <b>AK000792</b>  | ---                                                                       | 2.04 | 0.03573  | 1.25  | 0.46118 |
| <b>AI733194</b>  | ---                                                                       | 2.04 | 0.00067  | -1.14 | 0.39928 |
| <b>GPR39</b>     | G protein-coupled receptor 39                                             | 2.04 | 0.01846  | -1.1  | 0.71956 |
| <b>LOC283788</b> | FSHD region gene 1 pseudogene                                             | 2.04 | 0.00034  | -1.24 | 0.14181 |
| <b>NAIP</b>      | NLR family, apoptosis inhibitory protein                                  | 2.04 | 0.00169  | 1.14  | 0.46342 |
| <b>ALS2CR8</b>   | amyotrophic lateral sclerosis 2 (juvenile) chromosome region, candidate 8 | 2.04 | 0.00411  | 1.23  | 0.31791 |
| <b>C1orf101</b>  | chromosome 1 open reading frame 101                                       | 2.04 | 0.00143  | 1.14  | 0.46068 |
| <b>ADAM17</b>    | ADAM metallopeptidase domain 17                                           | 2.05 | 0.00086  | 1.05  | 0.74106 |
| <b>MIR4448</b>   | microRNA 4448                                                             | 2.05 | 0.00859  | 1.13  | 0.58873 |
| <b>LOC254057</b> | uncharacterized LOC254057                                                 | 2.05 | 0.00033  | -1.03 | 0.80994 |
| <b>ASMTL-AS1</b> | ASMTL antisense RNA 1 (non-protein coding)                                | 2.05 | 0.00094  | 1.13  | 0.46551 |
| <b>SIAE</b>      | sialic acid acetyltransferase                                             | 2.05 | 0.01643  | 1.75  | 0.04921 |
| <b>FBXL14</b>    | F-box and leucine-rich repeat protein 14                                  | 2.05 | 0.00563  | 1.33  | 0.19441 |
| <b>C16orf53</b>  | Chromosome 16 open reading frame 53                                       | 2.06 | 0.01534  | -1.16 | 0.55377 |
| <b>LOC550643</b> | uncharacterized LOC550643                                                 | 2.06 | 2.00E-04 | 1.11  | 0.44152 |
| <b>ACOX1</b>     | acyl-CoA oxidase 1, palmitoyl                                             | 2.06 | 0.00013  | 1.33  | 0.04352 |
| <b>BPNT1</b>     | 3'(2'), 5'-bisphosphate nucleotidase 1                                    | 2.06 | 0.00118  | 1.05  | 0.77688 |
| <b>LOC283713</b> | uncharacterized LOC283713                                                 | 2.06 | 0.01445  | -1.01 | 0.98122 |
| <b>AL137616</b>  | ---                                                                       | 2.06 | 0.01173  | 1.03  | 0.8916  |
| <b>GGTLC2</b>    | gamma-glutamyltransferase light chain 2                                   | 2.07 | 0.00272  | -1.02 | 0.9107  |
| <b>STAP2</b>     | signal transducing adaptor family member 2                                | 2.07 | 0.0029   | 1.05  | 0.79627 |
| <b>HEG1</b>      | HEG homolog 1 (zebrafish)                                                 | 2.07 | 0.00062  | 1.76  | 0.00362 |
| <b>AK026824</b>  | ---                                                                       | 2.07 | 0.00021  | -1.1  | 0.47321 |
| <b>GSN</b>       | gelsolin                                                                  | 2.07 | 0.03916  | 1.4   | 0.30593 |
| <b>C1orf85</b>   | chromosome 1 open reading frame 85                                        | 2.08 | 0.01274  | -1.62 | 0.07457 |
| <b>PCDHB13</b>   | protocadherin beta 13                                                     | 2.08 | 0.01211  | 1.05  | 0.83425 |
| <b>AK025218</b>  | ---                                                                       | 2.08 | 0.003    | 1.34  | 0.15435 |
| <b>BF511336</b>  | ---                                                                       | 2.08 | 0.00188  | 1.01  | 0.96832 |
| <b>PVRL1</b>     | poliovirus receptor-related 1 (herpesvirus entry mediator C)              | 2.08 | 0.00444  | 1.23  | 0.32848 |
| <b>TNS3</b>      | tensin 3                                                                  | 2.08 | 0.00144  | -1.5  | 0.03891 |
| <b>LAGE3</b>     | L antigen family, member 3                                                | 2.08 | 0.00098  | 1.42  | 0.05291 |
| <b>PHYH</b>      | phytanoyl-CoA 2-hydroxylase                                               | 2.09 | 0.00094  | 1.6   | 0.0146  |
| <b>TRIM29</b>    | tripartite motif containing 29                                            | 2.09 | 0.00459  | 1.38  | 0.14362 |
| <b>PPP1R3F</b>   | Protein phosphatase 1, regulatory subunit 3F                              | 2.09 | 0.03058  | -1.09 | 0.77736 |
| <b>RASA4</b>     | RAS p21 protein activator 4                                               | 2.09 | 0.00965  | 1.95  | 0.0161  |
| <b>COL5A1</b>    | collagen, type V, alpha 1                                                 | 2.09 | 0.00254  | 1.17  | 0.42331 |
| <b>RNFT1</b>     | ring finger protein, transmembrane 1                                      | 2.09 | 0.01525  | 1.2   | 0.48369 |
| <b>LOC92249</b>  | uncharacterized LOC92249                                                  | 2.09 | 0.0414   | 1.27  | 0.46341 |
| <b>BU929456</b>  | ---                                                                       | 2.10 | 0.02389  | 1.49  | 0.18274 |
| <b>LRRRC70</b>   | leucine rich repeat containing 70                                         | 2.10 | 0.00524  | -1.26 | 0.29618 |
| <b>ESYT1</b>     | Extended synaptotagmin-like protein 1                                     | 2.10 | 0.00228  | 1     | 0.98191 |
| <b>TYMP</b>      | thymidine phosphorylase                                                   | 2.10 | 0.00195  | 1.23  | 0.2731  |
| <b>POU3F1</b>    | POU class 3 homeobox 1                                                    | 2.10 | 0.03782  | -1.21 | 0.55021 |
| <b>ZNF264</b>    | zinc finger protein 264                                                   | 2.11 | 0.00722  | 1.04  | 0.86    |
| <b>SNRNP27</b>   | small nuclear ribonucleoprotein 27kDa (U4/U6.U5)                          | 2.11 | 0.00042  | 1.63  | 0.00705 |
| <b>HEATR7A</b>   | HEAT repeat containing 7A                                                 | 2.11 | 0.00545  | 1.22  | 0.37226 |
| <b>TRPM7</b>     | transient receptor potential cation channel, subfamily M, member 7        | 2.12 | 0.01021  | 1.21  | 0.44209 |
| <b>FCHSD2</b>    | FCH and double SH3 domains 2                                              | 2.12 | 0.00012  | 1.82  | 0.00073 |

|                  |                                                                                                      |      |          |       |         |
|------------------|------------------------------------------------------------------------------------------------------|------|----------|-------|---------|
| <b>PARD3B</b>    | par-3 partitioning defective 3 homolog B (C. elegans)                                                | 2.13 | 0.00148  | 1.36  | 0.10947 |
| <b>KLHL24</b>    | kelch-like 24 (Drosophila)                                                                           | 2.13 | 0.00038  | 1     | 0.98012 |
| <b>MORC2-AS1</b> | MORC2 antisense RNA 1 (non-protein coding)                                                           | 2.13 | 6.00E-05 | -1.12 | 0.37322 |
| <b>LOC90246</b>  | uncharacterized LOC90246                                                                             | 2.13 | 0.00525  | 1.08  | 0.73091 |
| <b>SLC35D1</b>   | solute carrier family 35 (UDP-glucuronic acid/UDP-N-acetylgalactosamine dual transporter), member D1 | 2.13 | 0.03689  | 1.16  | 0.65377 |
| <b>BG232090</b>  | ---                                                                                                  | 2.13 | 0.01274  | 1.02  | 0.92906 |
| <b>KRI1</b>      | KRI1 homolog (S. cerevisiae)                                                                         | 2.14 | 0.00339  | 1.14  | 0.53505 |
| <b>ECHDC2</b>    | enoyl CoA hydratase domain containing 2                                                              | 2.14 | 0.00084  | 1.31  | 0.13304 |
| <b>PATL2</b>     | protein associated with topoisomerase II homolog 2 (yeast)                                           | 2.14 | 0.00148  | 1.5   | 0.04419 |
| <b>TPM1</b>      | tropomyosin 1 (alpha)                                                                                | 2.14 | 0.00161  | -1.03 | 0.87218 |
| <b>AU157675</b>  | ---                                                                                                  | 2.14 | 0.00064  | -1.06 | 0.71295 |
| <b>BF724733</b>  | ---                                                                                                  | 2.14 | 0.00131  | -1.06 | 0.74114 |
| <b>C1QTNF3</b>   | C1q and tumor necrosis factor related protein 3                                                      | 2.14 | 0.04033  | 1.38  | 0.34722 |
| <b>CXCR7</b>     | Chemokine (C-X-C motif) receptor 7                                                                   | 2.14 | 0.0034   | 1.05  | 0.80132 |
| <b>TSHZ1</b>     | teashirt zinc finger homeobox 1                                                                      | 2.15 | 0.00687  | 1.02  | 0.94378 |
| <b>AI223854</b>  | ---                                                                                                  | 2.15 | 0.00628  | 1.08  | 0.73394 |
| <b>FLJ13197</b>  | uncharacterized FLJ13197                                                                             | 2.15 | 0.04223  | 1.19  | 0.60376 |
| <b>PCDHB5</b>    | protocadherin beta 5                                                                                 | 2.15 | 0.02824  | 1     | 0.98756 |
| <b>WWOX</b>      | WW domain containing oxidoreductase                                                                  | 2.15 | 0.00046  | 1.54  | 0.01682 |
| <b>C17orf108</b> | chromosome 17 open reading frame 108                                                                 | 2.15 | 0.00208  | 1.03  | 0.86556 |
| <b>PARM1</b>     | prostate androgen-regulated mucin-like protein 1                                                     | 2.16 | 0.00136  | 1     | 0.97831 |
| <b>ZBTB20</b>    | zinc finger and BTB domain containing 20                                                             | 2.16 | 0.00686  | 1.15  | 0.56129 |
| <b>PLCD3</b>     | phospholipase C, delta 3                                                                             | 2.16 | 0.00288  | 1.05  | 0.79755 |
| <b>UNC13D</b>    | unc-13 homolog D (C. elegans)                                                                        | 2.16 | 8.00E-05 | 1.35  | 0.03391 |
| <b>ATG4D</b>     | autophagy related 4D, cysteine peptidase                                                             | 2.16 | 0.00176  | 1.07  | 0.71567 |
| <b>NBPF1</b>     | neuroblastoma breakpoint family, member 1                                                            | 2.17 | 0.02157  | 1.27  | 0.42214 |
| <b>GATA3</b>     | GATA binding protein 3                                                                               | 2.17 | 0.00095  | -1.41 | 0.07244 |
| <b>RASSF6</b>    | Ras association (RalGDS/AF-6) domain family member 6                                                 | 2.17 | 0.02682  | -1.36 | 0.33041 |
| <b>AA262084</b>  | ---                                                                                                  | 2.17 | 0.03946  | -1.08 | 0.81551 |
| <b>LOC728978</b> | uncharacterized LOC728978                                                                            | 2.18 | 0.02444  | -1.15 | 0.64854 |
| <b>ZMYM6</b>     | zinc finger, MYM-type 6                                                                              | 2.18 | 0.00019  | 1.15  | 0.32879 |
| <b>BDH2</b>      | 3-hydroxybutyrate dehydrogenase, type 2                                                              | 2.18 | 1.00E-05 | 1.2   | 0.09172 |
| <b>TTC18</b>     | tetratricopeptide repeat domain 18                                                                   | 2.18 | 0.00182  | 1.28  | 0.21352 |
| <b>AI298089</b>  | ---                                                                                                  | 2.18 | 0.0468   | 1.08  | 0.83562 |
| <b>HSPB1</b>     | heat shock 27kDa protein 1                                                                           | 2.18 | 0.02484  | 1.04  | 0.88568 |
| <b>NKIRAS2</b>   | NFKB inhibitor interacting Ras-like 2                                                                | 2.19 | 0.00053  | 1.39  | 0.06596 |
| <b>LRRC37A4P</b> | leucine rich repeat containing 37, member A4, pseu                                                   | 2.19 | 0.00033  | 1.17  | 0.31018 |
| <b>AU144676</b>  | ---                                                                                                  | 2.19 | 0.02347  | 1.3   | 0.3977  |
| <b>AL049975</b>  | ---                                                                                                  | 2.19 | 0.0336   | 1.14  | 0.68317 |
| <b>FLJ40852</b>  | uncharacterized LOC285962                                                                            | 2.19 | 0.00078  | 1.13  | 0.47245 |
| <b>SORCS2</b>    | sortilin-related VPS10 domain containing receptor 2                                                  | 2.19 | 0.00024  | 1.45  | 0.02582 |
| <b>TNNT2</b>     | troponin T type 2 (cardiac)                                                                          | 2.19 | 0.02191  | -1.18 | 0.5735  |
| <b>LIMK2</b>     | LIM domain kinase 2                                                                                  | 2.19 | 0.00035  | 1.46  | 0.03027 |
| <b>PKP1</b>      | plakophilin 1 (ectodermal dysplasia/skin fragility syndrome)                                         | 2.19 | 0.01695  | 1.23  | 0.47672 |
| <b>AK025797</b>  | ---                                                                                                  | 2.19 | 0.00536  | 1.23  | 0.38601 |
| <b>RIT1</b>      | Ras-like without CAAX 1                                                                              | 2.19 | 0.00065  | 1.98  | 0.00174 |
| <b>BF830560</b>  | ---                                                                                                  | 2.19 | 0.001    | -1.22 | 0.28443 |

|                  |                                                                                |      |          |       |         |
|------------------|--------------------------------------------------------------------------------|------|----------|-------|---------|
| <b>USP15</b>     | ubiquitin specific peptidase 15                                                | 2.20 | 0.00027  | 1.43  | 0.03219 |
| <b>FOXP4</b>     | forkhead box P4                                                                | 2.20 | 0.00347  | -1.03 | 0.90793 |
| <b>TNNI2</b>     | troponin I type 2 (skeletal, fast)                                             | 2.20 | 0.00176  | 1.02  | 0.93594 |
| <b>CCDC171</b>   | coiled-coil domain containing 171                                              | 2.21 | 0.04585  | 1.44  | 0.32171 |
| <b>TMEM19</b>    | transmembrane protein 19                                                       | 2.21 | 0.00031  | 1.04  | 0.79873 |
| <b>CYFIP2</b>    | cytoplasmic FMR1 interacting protein 2                                         | 2.21 | 0.00134  | -1.35 | 0.12695 |
| <b>AA826176</b>  | ---                                                                            | 2.21 | 0.01913  | 1.27  | 0.42891 |
| <b>C14orf164</b> | chromosome 14 open reading frame 164                                           | 2.21 | 0.00123  | 1.14  | 0.47351 |
| <b>NTF4</b>      | neurotrophin 4                                                                 | 2.21 | 0.0318   | 1.09  | 0.7921  |
| <b>W60691</b>    | ---                                                                            | 2.21 | 0.00071  | 1.3   | 0.15038 |
| <b>MSX2</b>      | msh homeobox 2                                                                 | 2.22 | 0.02264  | 1.15  | 0.64938 |
| <b>SLC31A2</b>   | solute carrier family 31 (copper transporters), member 2                       | 2.22 | 0.0313   | 1.46  | 0.26686 |
| <b>BC038589</b>  | ---                                                                            | 2.23 | 0.01091  | 1.07  | 0.78592 |
| <b>AW518747</b>  | ---                                                                            | 2.23 | 3.00E-05 | -1.25 | 0.07916 |
| <b>SCARF1</b>    | scavenger receptor class F, member 1                                           | 2.23 | 0.0238   | -1.08 | 0.8043  |
| <b>EHD2</b>      | EH-domain containing 2                                                         | 2.24 | 0.00413  | 1.29  | 0.27936 |
| <b>ARL6IP5</b>   | ADP-ribosylation-like factor 6 interacting protein 5                           | 2.24 | 2.00E-05 | 1.21  | 0.11617 |
| <b>SPECC1</b>    | sperm antigen with calponin homology and coiled-coil domains 1                 | 2.24 | 0.03375  | 1.27  | 0.4909  |
| <b>TPTE2P5</b>   | transmembrane phosphoinositide 3-phosphatase and tensin homolog 2 pseudogene 5 | 2.24 | 0.02917  | -1.01 | 0.98163 |
| <b>AGAP11</b>    | ankyrin repeat and GTPase domain Arf GTPase activating protein 11              | 2.24 | 0.0014   | 1.08  | 0.67841 |
| <b>KANK1</b>     | KN motif and ankyrin repeat domains 1                                          | 2.24 | 0.01039  | 1.07  | 0.78857 |
| <b>GTF2IRD2</b>  | GTF2I repeat domain containing 2                                               | 2.25 | 0.04855  | 1.07  | 0.85271 |
| <b>JAG2</b>      | jagged 2                                                                       | 2.25 | 0.00069  | 1.2   | 0.30957 |
| <b>CLCN4</b>     | chloride channel, voltage-sensitive 4                                          | 2.25 | 0.00045  | -1.06 | 0.7175  |
| <b>RPL10</b>     | ribosomal protein L10                                                          | 2.25 | 0.00086  | 1.23  | 0.26847 |
| <b>BF055351</b>  | ---                                                                            | 2.25 | 0.00457  | 1.12  | 0.61965 |
| <b>TOLLIP</b>    | toll interacting protein                                                       | 2.26 | 0.00363  | 1.25  | 0.32907 |
| <b>MTCH2</b>     | mitochondrial carrier 2                                                        | 2.26 | 3.00E-05 | 1.23  | 0.10178 |
| <b>CAB39L</b>    | calcium binding protein 39-like                                                | 2.26 | 0.02214  | 1     | 0.98838 |
| <b>NUDT19</b>    | nudix (nucleoside diphosphate linked moiety X)-type motif 19                   | 2.26 | 8.00E-05 | 1.8   | 0.00103 |
| <b>R37728</b>    | ---                                                                            | 2.26 | 0.03292  | 1.08  | 0.83026 |
| <b>PIK3R2</b>    | phosphoinositide-3-kinase, regulatory subunit 2 (beta)                         | 2.26 | 0.00135  | 1.01  | 0.94671 |
| <b>ID2</b>       | inhibitor of DNA binding 2, dominant negative helix-loop-helix protein         | 2.27 | 0.00677  | 1.5   | 0.12531 |
| <b>AMT</b>       | aminomethyltransferase                                                         | 2.27 | 7.00E-05 | 1.03  | 0.82082 |
| <b>PPIEL</b>     | peptidylprolyl isomerase E-like pseudogene                                     | 2.28 | 0.01001  | 1.02  | 0.93498 |
| <b>C5orf46</b>   | chromosome 5 open reading frame 46                                             | 2.28 | 0.00056  | -1.15 | 0.42013 |
| <b>MARVELD1</b>  | MARVEL domain containing 1                                                     | 2.29 | 0.00019  | 1.24  | 0.17822 |
| <b>DQX1</b>      | DEAQ box RNA-dependent ATPase 1                                                | 2.29 | 0.0023   | 1.48  | 0.08801 |
| <b>TJP3</b>      | tight junction protein 3 (zona occludens 3)                                    | 2.29 | 6.00E-05 | -1.06 | 0.66876 |
| <b>COL18A1</b>   | collagen, type XVIII, alpha 1                                                  | 2.29 | 0.01342  | 1.23  | 0.46997 |
| <b>DECR1</b>     | 2,4-dienoyl CoA reductase 1, mitochondrial                                     | 2.30 | 8.00E-05 | 1.21  | 0.17307 |
| <b>ABCC10</b>    | ATP-binding cassette, sub-family C (CFTR/MRP), member 10                       | 2.30 | 0.00895  | 1.39  | 0.23724 |
| <b>MACROD2</b>   | MACRO domain containing 2                                                      | 2.30 | 0.01558  | 1.19  | 0.56634 |
| <b>NODAL</b>     | nodal homolog (mouse)                                                          | 2.30 | 0.00052  | -1.07 | 0.70918 |
| <b>AW576443</b>  | ---                                                                            | 2.30 | 0.00097  | 1.36  | 0.12558 |

|                  |                                                                                  |      |          |       |         |
|------------------|----------------------------------------------------------------------------------|------|----------|-------|---------|
| <b>AI990613</b>  | ---                                                                              | 2.31 | 0.033    | 1.04  | 0.91665 |
| <b>IFITM10</b>   | interferon induced transmembrane protein 10                                      | 2.31 | 0.02374  | -1.43 | 0.28573 |
| <b>NRF1</b>      | nuclear respiratory factor 1                                                     | 2.31 | 9.00E-05 | 1.01  | 0.96325 |
| <b>PER3</b>      | period homolog 3 (Drosophila)                                                    | 2.31 | 0.00025  | 1.18  | 0.31749 |
| <b>KRTAP19-1</b> | keratin associated protein 19-1                                                  | 2.32 | 0.00791  | 1.16  | 0.56431 |
| <b>TP53INP1</b>  | tumor protein p53 inducible nuclear protein 1                                    | 2.32 | 0.00257  | 1.44  | 0.11363 |
| <b>TMCC1</b>     | transmembrane and coiled-coil domain family 1                                    | 2.32 | 2.00E-04 | 1.56  | 0.01398 |
| <b>AK021983</b>  | ---                                                                              | 2.32 | 0.00403  | 1.12  | 0.62022 |
| <b>AI797043</b>  | ---                                                                              | 2.32 | 0.00903  | 1.43  | 0.20276 |
| <b>LRTOMT</b>    | leucine rich transmembrane and O-methyltransferase domain containing             | 2.33 | 0.00486  | 1.02  | 0.93902 |
| <b>AU146764</b>  | ---                                                                              | 2.33 | 0.00319  | -1.07 | 0.75727 |
| <b>ARHGEF7</b>   | Rho guanine nucleotide exchange factor (GEF) 7                                   | 2.34 | 0.00046  | -1.02 | 0.89421 |
| <b>KRTAP19-3</b> | keratin associated protein 19-3                                                  | 2.34 | 0.03429  | 1.01  | 0.96693 |
| <b>TAGLN</b>     | transgelin                                                                       | 2.34 | 0.03019  | -1.39 | 0.34995 |
| <b>ALS2CL</b>    | ALS2 C-terminal like                                                             | 2.34 | 0.00318  | 1.31  | 0.25332 |
| <b>ZNF652</b>    | zinc finger protein 652                                                          | 2.35 | 0.01964  | -1    | 0.99832 |
| <b>DUSP5P</b>    | dual specificity phosphatase 5 pseudogene                                        | 2.35 | 0.00587  | 1.29  | 0.32585 |
| <b>SYT8</b>      | synaptotagmin VIII                                                               | 2.35 | 0.00062  | 1.03  | 0.88476 |
| <b>AI369187</b>  | ---                                                                              | 2.35 | 0.01507  | 1.32  | 0.3678  |
| <b>AW419344</b>  | ---                                                                              | 2.35 | 0.00697  | -1.1  | 0.72472 |
| <b>TPTE2P6</b>   | transmembrane phosphoinositide 3-phosphatase and tensin homolog 2 pseudogene 6   | 2.35 | 0.00653  | 1.11  | 0.69569 |
| <b>MKNK2</b>     | MAP kinase interacting serine/threonine kinase 2                                 | 2.37 | 0.0013   | 1.64  | 0.03092 |
| <b>TRIM73</b>    | tripartite motif containing 73                                                   | 2.37 | 0.00371  | -1.17 | 0.51377 |
| <b>HYI</b>       | hydroxypyruvate isomerase (putative)                                             | 2.37 | 3.00E-05 | 1.24  | 0.10149 |
| <b>BF507518</b>  | ---                                                                              | 2.37 | 0.00321  | 1.33  | 0.24153 |
| <b>TAPBP</b>     | TAP binding protein (tapasin)                                                    | 2.37 | 0.00028  | 1.33  | 0.10536 |
| <b>R76828</b>    | ---                                                                              | 2.37 | 0.0014   | 1.31  | 0.20241 |
| <b>KCNIP3</b>    | Kv channel interacting protein 3, calsenilin                                     | 2.37 | 0.00315  | 1.13  | 0.59461 |
| <b>AU146493</b>  | ---                                                                              | 2.38 | 0.00349  | 1.3   | 0.28289 |
| <b>R62588</b>    | ---                                                                              | 2.38 | 0.03948  | -1.41 | 0.37184 |
| <b>SLC7A8</b>    | solute carrier family 7 (amino acid transporter light chain, L system), member 8 | 2.38 | 0.00423  | 1.22  | 0.41428 |
| <b>BC014318</b>  | ---                                                                              | 2.39 | 0.00048  | 1.25  | 0.2264  |
| <b>MAP3K12</b>   | mitogen-activated protein kinase kinase kinase 12                                | 2.40 | 0.00276  | 1.34  | 0.21773 |
| <b>ARNT</b>      | aryl hydrocarbon receptor nuclear translocator                                   | 2.40 | 0.03055  | 1.19  | 0.62804 |
| <b>N25555</b>    | ---                                                                              | 2.40 | 0.01166  | 1.74  | 0.08128 |
| <b>LOC158696</b> | uncharacterized LOC158696                                                        | 2.40 | 0.01369  | 1.12  | 0.71499 |
| <b>ADHFE1</b>    | alcohol dehydrogenase, iron containing, 1                                        | 2.41 | 0.00011  | 1.46  | 0.02704 |
| <b>TP53AIP1</b>  | tumor protein p53 regulated apoptosis inducing protein 1                         | 2.42 | 0.0429   | -1.17 | 0.68548 |
| <b>AI002328</b>  | ---                                                                              | 2.42 | 0.00014  | 1.08  | 0.61826 |
| <b>QKI</b>       | QKI, KH domain containing, RNA binding                                           | 2.42 | 8.00E-05 | -1.17 | 0.29872 |
| <b>TMLHE-AS1</b> | TMLHE antisense RNA 1                                                            | 2.42 | 0.00013  | 1.15  | 0.37539 |
| <b>PPM1L</b>     | protein phosphatase, Mg <sup>2+</sup> /Mn <sup>2+</sup> dependent, 1L            | 2.42 | 5.00E-04 | 1.33  | 0.13923 |
| <b>DNASE1L1</b>  | deoxyribonuclease I-like 1                                                       | 2.42 | 4.00E-05 | 1.17  | 0.24881 |
| <b>ENPP5</b>     | ectonucleotide pyrophosphatase/phosphodiesterase 5 (putative)                    | 2.42 | 4.00E-05 | -1.04 | 0.7721  |
| <b>CHADL</b>     | chondroadherin-like                                                              | 2.43 | 0.00027  | 1.12  | 0.52001 |
| <b>SEC31B</b>    | SEC31 homolog B (S. cerevisiae)                                                  | 2.43 | 0.01562  | 1.09  | 0.785   |
| <b>C5orf56</b>   | chromosome 5 open reading frame 56                                               | 2.43 | 0.00029  | 1.47  | 0.04385 |
| <b>FBXO32</b>    | F-box protein 32                                                                 | 2.44 | 0.02761  | 1.18  | 0.63639 |
| <b>SMPDL3A</b>   | sphingomyelin phosphodiesterase, acid-like 3A                                    | 2.45 | 0.00035  | 1.64  | 0.01603 |

|                     |                                                             |      |          |       |         |
|---------------------|-------------------------------------------------------------|------|----------|-------|---------|
| <b>RNA45S5</b>      | RNA, 45S pre-ribosomal 5                                    | 2.45 | 0.0064   | 1.23  | 0.44628 |
| <b>AI097501</b>     | ---                                                         | 2.46 | 0.00085  | -1.03 | 0.87228 |
| <b>AW976035</b>     | ---                                                         | 2.46 | 0.03597  | 1.02  | 0.95553 |
| <b>BMF</b>          | Bcl2 modifying factor                                       | 2.46 | 0.0078   | 1.08  | 0.78909 |
| <b>AW189097</b>     | ---                                                         | 2.46 | 0.03749  | 1.02  | 0.95771 |
| <b>ARMCX1</b>       | armadillo repeat containing, X-linked 1                     | 2.47 | 0.00665  | 1.09  | 0.75567 |
| <b>CRYL1</b>        | crystallin, lambda 1                                        | 2.47 | 0.0071   | 1.64  | 0.09685 |
| <b>ADAMTS5 *</b>    | ADAM metallopeptidase with thrombospondin type 1 motif, 5   | 2.47 | 0.00743  | -2.26 | 0.01801 |
| <b>PRICKLE1</b>     | prickle homolog 1 (Drosophila)                              | 2.48 | 0.0021   | 1.34  | 0.21789 |
| <b>UHRF1BP1L</b>    | UHRF1 binding protein 1-like                                | 2.48 | 3.00E-05 | 1.38  | 0.03248 |
| <b>LOC100129890</b> | similar to hCG1750329                                       | 2.48 | 0.00643  | 1.05  | 0.85927 |
| <b>AKAP9</b>        | A kinase (PRKA) anchor protein (yotiao) 9                   | 2.49 | 0.00012  | -1.09 | 0.58062 |
| <b>CYP1B1</b>       | cytochrome P450, family 1, subfamily B, polypeptide 1       | 2.49 | 0.00047  | 1.72  | 0.01311 |
| <b>ERC1</b>         | ELKS/RAB6-interacting/CAST family member 1                  | 2.50 | 0.00103  | -1.11 | 0.60298 |
| <b>ARHGAP24</b>     | Rho GTPase activating protein 24                            | 2.50 | 0.001    | -1.12 | 0.59272 |
| <b>TMEM178A</b>     | transmembrane protein 178A                                  | 2.52 | 0.02309  | 1.27  | 0.50566 |
| <b>MARCKS</b>       | myristoylated alanine-rich protein kinase C substrate       | 2.52 | 0.0027   | 1.07  | 0.78962 |
| <b>EPHA4</b>        | EPH receptor A4                                             | 2.53 | 0.02907  | 1.06  | 0.87192 |
| <b>MACC1</b>        | metastasis associated in colon cancer 1                     | 2.53 | 0.0175   | -1.03 | 0.93825 |
| <b>ZNF277</b>       | zinc finger protein 277                                     | 2.53 | 0.02947  | 1.24  | 0.56981 |
| <b>RCAN2</b>        | regulator of calcineurin 2                                  | 2.54 | 0.00063  | 1.04  | 0.82534 |
| <b>ARID5B</b>       | AT rich interactive domain 5B (MRF1-like)                   | 2.54 | 0.01386  | -1    | 0.9977  |
| <b>LOC284837</b>    | uncharacterized LOC284837                                   | 2.55 | 0.01852  | 1.06  | 0.86776 |
| <b>AK022004</b>     | ---                                                         | 2.55 | 0.00027  | 1.21  | 0.29197 |
| <b>HOXD9</b>        | homeobox D9                                                 | 2.56 | 0.00068  | -1.32 | 0.18692 |
| <b>SLCO6A1</b>      | solute carrier organic anion transporter family, member 6A1 | 2.56 | 0.00157  | 1.24  | 0.35535 |
| <b>HOXD10</b>       | homeobox D10                                                | 2.56 | 6.00E-05 | 1.69  | 0.00434 |
| <b>GRAMD2</b>       | GRAM domain containing 2                                    | 2.56 | 1.00E-05 | 1.23  | 0.08914 |
| <b>BMP7</b>         | bone morphogenetic protein 7                                | 2.57 | 0.00327  | 1.14  | 0.60026 |
| <b>EME2</b>         | essential meiotic endonuclease 1 homolog 2 (S. pombe)       | 2.57 | 1.00E-05 | 1.04  | 0.74187 |
| <b>AI287817</b>     | ---                                                         | 2.57 | 0.01101  | 1.21  | 0.5544  |
| <b>LRRN4CL</b>      | LRRN4 C-terminal like                                       | 2.58 | 0.00483  | 1.18  | 0.54147 |
| <b>HSPB3</b>        | heat shock 27kDa protein 3                                  | 2.58 | 0.01175  | 1.09  | 0.78095 |
| <b>MYLK</b>         | myosin light chain kinase                                   | 2.58 | 0.00098  | -1.13 | 0.57064 |
| <b>N35099</b>       | ---                                                         | 2.58 | 0.00375  | 1.18  | 0.5246  |
| <b>SNRPN</b>        | small nuclear ribonucleoprotein polypeptide N               | 2.59 | 0.00037  | 1.21  | 0.32605 |
| <b>LOC338651</b>    | uncharacterized LOC338651                                   | 2.60 | 0.02727  | 1.26  | 0.55128 |
| <b>AL110133</b>     | ---                                                         | 2.61 | 0.00103  | -1.15 | 0.53153 |
| <b>ARHGAP22</b>     | Rho GTPase activating protein 22                            | 2.61 | 0.00308  | -1.05 | 0.84621 |
| <b>COX7B</b>        | cytochrome c oxidase subunit VIIb                           | 2.61 | 3.00E-05 | 1.51  | 0.01156 |
| <b>ZNF503-AS1</b>   | ZNF503 antisense RNA 1 (non-protein coding)                 | 2.62 | 0.00131  | 1.06  | 0.78335 |
| <b>AL833462</b>     | ---                                                         | 2.62 | 0.00017  | 1.39  | 0.07922 |
| <b>HSPB2</b>        | heat shock 27kDa protein 2                                  | 2.62 | 0.00016  | -1.04 | 0.81823 |
| <b>IGHG3</b>        | immunoglobulin heavy constant gamma 3 (G3m m                | 2.63 | 0.00409  | -1.07 | 0.81139 |
| <b>SNHG7</b>        | small nucleolar RNA host gene 7 (non-protein coding)        | 2.64 | 0.00013  | -1.3  | 0.13732 |
| <b>PRODH</b>        | proline dehydrogenase (oxidase) 1                           | 2.66 | 0.01094  | 1.65  | 0.14232 |
| <b>APCDD1</b>       | adenomatosis polyposis coli down-regulated 1                | 2.67 | 0.00134  | 1.06  | 0.80664 |
| <b>PLA2R1 *</b>     | phospholipase A2 receptor 1, 180kDa                         | 2.68 | 0.00043  | -2.03 | 0.00428 |



|                     |                                                                                                        |      |          |       |          |
|---------------------|--------------------------------------------------------------------------------------------------------|------|----------|-------|----------|
| <b>BAG1</b>         | BCL2-associated athanogene                                                                             | 2.68 | 0.00699  | -1.33 | 0.35244  |
| <b>ZMYM3</b>        | zinc finger, MYM-type 3                                                                                | 2.69 | 0.00149  | 1.38  | 0.19142  |
| <b>PIK3C2B</b>      | phosphoinositide-3-kinase, class 2, beta polypeptide                                                   | 2.70 | 2.00E-05 | 1.9   | 8.00E-04 |
| <b>LOC100859930</b> | uncharacterized LOC100859930                                                                           | 2.70 | 0.00485  | -1.09 | 0.76229  |
| <b>AI421234</b>     | ---                                                                                                    | 2.71 | 0.00033  | -1.08 | 0.69165  |
| <b>AI612775</b>     | ---                                                                                                    | 2.72 | 0.00671  | 1.09  | 0.77381  |
| <b>CDHR1</b>        | cadherin-related family member 1                                                                       | 2.72 | 0.00197  | -1.05 | 0.85695  |
| <b>HMCN1</b>        | hemicentin 1                                                                                           | 2.72 | 0.00695  | 1.17  | 0.61087  |
| <b>NRBP2</b>        | nuclear receptor binding protein 2                                                                     | 2.73 | 4.00E-05 | 1.7   | 0.00505  |
| <b>PLCD4</b>        | phospholipase C, delta 4                                                                               | 2.74 | 0.02692  | 1.02  | 0.95945  |
| <b>CXorf56</b>      | chromosome X open reading frame 56                                                                     | 2.74 | 0.00029  | -1.24 | 0.2819   |
| <b>AI686664</b>     | ---                                                                                                    | 2.75 | 1.00E-04 | -1.37 | 0.08707  |
| <b>SERPINF1</b>     | serpin peptidase inhibitor, clade F (alpha-2 antiplasmin, pigment epithelium derived factor), member 1 | 2.76 | 0.0021   | -1.06 | 0.83247  |
| <b>ANXA4</b>        | annexin A4                                                                                             | 2.76 | 0.00047  | 1.71  | 0.02361  |
| <b>LOC100507117</b> | uncharacterized LOC100507117                                                                           | 2.77 | 0.01431  | -1.01 | 0.98515  |
| <b>OVGP1</b>        | oviductal glycoprotein 1, 120kDa                                                                       | 2.78 | 8.00E-05 | -1.1  | 0.57301  |
| <b>DLX5</b>         | distal-less homeobox 5                                                                                 | 2.78 | 0.00562  | -1.15 | 0.64782  |
| <b>DGCR11</b>       | DiGeorge syndrome critical region gene 11 (non-protein coding)                                         | 2.79 | 3.00E-05 | 1.29  | 0.11696  |
| <b>NREP</b>         | neuronal regeneration related protein homolog (rat)                                                    | 2.79 | 9.00E-05 | 1.55  | 0.02402  |
| <b>W96062</b>       | ---                                                                                                    | 2.82 | 0.01089  | 1.69  | 0.14607  |
| <b>ATP6V1G1</b>     | ATPase, H <sup>+</sup> transporting, lysosomal 13kDa, V1 subunit G1                                    | 2.84 | 0.00023  | 1.5   | 0.05582  |
| <b>MAF</b>          | v-maf musculoaponeurotic fibrosarcoma oncogene homolog (avian)                                         | 2.84 | 0.00295  | 1.31  | 0.34664  |
| <b>KAL1</b>         | Kallmann syndrome 1 sequence                                                                           | 2.86 | 0.00116  | -1.21 | 0.44599  |
| <b>ALDH2</b>        | aldehyde dehydrogenase 2 family (mitochondrial)                                                        | 2.86 | 0.00103  | 1.06  | 0.81366  |
| <b>ATOH8</b>        | atonal homolog 8 (Drosophila)                                                                          | 2.87 | 0.00687  | -1.38 | 0.32394  |
| <b>FLJ33630</b>     | uncharacterized LOC644873                                                                              | 2.87 | 0.00018  | 1.38  | 0.11262  |
| <b>U46120</b>       | ---                                                                                                    | 2.87 | 0.00822  | 1.19  | 0.60449  |
| <b>NDST1</b>        | N-deacetylase/N-sulfotransferase (heparan glucosaminyl) 1                                              | 2.89 | 0.01287  | 1.3   | 0.47444  |
| <b>EGFL6</b>        | EGF-like-domain, multiple 6                                                                            | 2.90 | 0.02041  | 1.18  | 0.68475  |
| <b>MCCC2</b>        | methylcrotonoyl-CoA carboxylase 2 (beta)                                                               | 2.91 | 0.00769  | 1.05  | 0.87969  |
| <b>KRT16</b>        | keratin 16                                                                                             | 2.92 | 0.00046  | 1.39  | 0.15277  |
| <b>AA031832</b>     | ---                                                                                                    | 2.96 | 0.00914  | 1.07  | 0.84765  |
| <b>B3GALT4</b>      | UDP-Gal:betaGlcNAc beta 1,3-galactosyltransferase, polypeptide 4                                       | 2.98 | 0.00203  | 1.67  | 0.08386  |
| <b>ZNF703</b>       | zinc finger protein 703                                                                                | 2.99 | 0.00035  | -1.37 | 0.16491  |
| <b>FRY</b>          | furry homolog (Drosophila)                                                                             | 3.00 | 0.00094  | 1.5   | 0.12302  |
| <b>ZMYND12</b>      | zinc finger, MYND-type containing 12                                                                   | 3.01 | 0.00254  | 1.9   | 0.04282  |
| <b>CKMT1A</b>       | creatine kinase, mitochondrial 1A                                                                      | 3.01 | 9.00E-05 | 1.37  | 0.10844  |
| <b>SOX6</b>         | SRY (sex determining region Y)-box 6                                                                   | 3.03 | 0.02047  | 1.12  | 0.78705  |
| <b>BF844863</b>     | ---                                                                                                    | 3.04 | 6.00E-05 | 1.61  | 0.01858  |
| <b>LGR6</b>         | leucine-rich repeat containing G protein-coupled receptor 6                                            | 3.10 | 0.00011  | 1.3   | 0.18888  |
| <b>KIAA1456</b>     | KIAA1456                                                                                               | 3.14 | 0.02984  | 1.71  | 0.26633  |
| <b>C1orf54</b>      | chromosome 1 open reading frame 54                                                                     | 3.15 | 0.00012  | 1.78  | 0.01332  |
| <b>KRT13</b>        | keratin 13                                                                                             | 3.17 | 0.00511  | 1.35  | 0.38327  |
| <b>ZMAT1</b>        | zinc finger, matrin-type 1                                                                             | 3.19 | 0.00225  | 1.48  | 0.20645  |

|                     |                                                                                                                                                                                                                                                                                                                                                                                                                                                                                                                               |      |          |       |         |
|---------------------|-------------------------------------------------------------------------------------------------------------------------------------------------------------------------------------------------------------------------------------------------------------------------------------------------------------------------------------------------------------------------------------------------------------------------------------------------------------------------------------------------------------------------------|------|----------|-------|---------|
| <b>VIPR1</b>        | vasoactive intestinal peptide receptor 1                                                                                                                                                                                                                                                                                                                                                                                                                                                                                      | 3.29 | 0.00018  | -1.1  | 0.65495 |
| <b>IQCH-AS1</b>     | IQCH antisense RNA 1 (non-protein coding)                                                                                                                                                                                                                                                                                                                                                                                                                                                                                     | 3.34 | 0.00017  | 1.55  | 0.0642  |
| <b>BF435593</b>     | ---                                                                                                                                                                                                                                                                                                                                                                                                                                                                                                                           | 3.36 | 1.00E-04 | -1.05 | 0.81941 |
| <b>WNT10A</b>       | Wingless-type MMTV integration site family, member 10A                                                                                                                                                                                                                                                                                                                                                                                                                                                                        | 3.38 | 0.00059  | 1.03  | 0.92006 |
| <b>AA001390</b>     | ---                                                                                                                                                                                                                                                                                                                                                                                                                                                                                                                           | 3.38 | 0.0182   | 1.21  | 0.67273 |
| <b>WNT4</b>         | wingless-type MMTV integration site family, member 4                                                                                                                                                                                                                                                                                                                                                                                                                                                                          | 3.39 | 0.00012  | -1.12 | 0.57986 |
| <b>GPNMB</b>        | glycoprotein (transmembrane) nmb                                                                                                                                                                                                                                                                                                                                                                                                                                                                                              | 3.47 | 0.01109  | -1.55 | 0.30571 |
| <b>GPR133</b>       | G protein-coupled receptor 133                                                                                                                                                                                                                                                                                                                                                                                                                                                                                                | 3.55 | 0.00646  | 1.21  | 0.62202 |
| <b>AL357212</b>     | ---                                                                                                                                                                                                                                                                                                                                                                                                                                                                                                                           | 3.57 | 0.00051  | 1.12  | 0.6731  |
| <b>SMPD1</b>        | sphingomyelin phosphodiesterase 1, acid lysosomal                                                                                                                                                                                                                                                                                                                                                                                                                                                                             | 3.59 | 1.00E-04 | 1.19  | 0.42387 |
| <b>DYNLRB1</b>      | dynein, light chain, roadblock-type 1                                                                                                                                                                                                                                                                                                                                                                                                                                                                                         | 3.64 | 0        | 1.93  | 0.00083 |
| <b>GGT6</b>         | gamma-glutamyltransferase 6                                                                                                                                                                                                                                                                                                                                                                                                                                                                                                   | 3.68 | 4.00E-05 | -1.07 | 0.72291 |
| <b>OLR1</b>         | oxidized low density lipoprotein (lectin-like) receptor 1                                                                                                                                                                                                                                                                                                                                                                                                                                                                     | 3.73 | 2.00E-05 | 1.22  | 0.2916  |
| <b>LOC100292680</b> | uncharacterized LOC100292680                                                                                                                                                                                                                                                                                                                                                                                                                                                                                                  | 3.76 | 0.0032   | -1.2  | 0.61063 |
| <b>PLEKHB1</b>      | pleckstrin homology domain containing, family B (evectins) member 1                                                                                                                                                                                                                                                                                                                                                                                                                                                           | 3.77 | 0        | -1.28 | 0.12964 |
| <b>LGR5</b>         | leucine-rich repeat containing G protein-coupled receptor 5                                                                                                                                                                                                                                                                                                                                                                                                                                                                   | 3.79 | 0.00017  | -1.05 | 0.84761 |
| <b>TPCN2</b>        | two pore segment channel 2                                                                                                                                                                                                                                                                                                                                                                                                                                                                                                    | 3.81 | 3.00E-05 | 1.63  | 0.02946 |
| <b>HIST3H2A</b>     | histone cluster 3, H2a                                                                                                                                                                                                                                                                                                                                                                                                                                                                                                        | 3.82 | 1.00E-05 | 1.06  | 0.73512 |
| <b>HSD17B10</b>     | hydroxysteroid (17-beta) dehydrogenase 10                                                                                                                                                                                                                                                                                                                                                                                                                                                                                     | 3.84 | 0        | 1.69  | 0.00572 |
| <b>SLC47A2</b>      | solute carrier family 47, member 2                                                                                                                                                                                                                                                                                                                                                                                                                                                                                            | 3.86 | 2.00E-05 | 1.74  | 0.01412 |
| <b>STX19</b>        | syntaxin 19                                                                                                                                                                                                                                                                                                                                                                                                                                                                                                                   | 3.89 | 7.00E-05 | 1.07  | 0.76025 |
| <b>EDN2</b>         | endothelin 2                                                                                                                                                                                                                                                                                                                                                                                                                                                                                                                  | 4.04 | 0.00168  | 1.3   | 0.44591 |
| <b>EDN1</b>         | endothelin 1                                                                                                                                                                                                                                                                                                                                                                                                                                                                                                                  | 4.04 | 0.00056  | 1.32  | 0.35072 |
| <b>AK021431</b>     | ---                                                                                                                                                                                                                                                                                                                                                                                                                                                                                                                           | 4.18 | 0.00837  | 1.13  | 0.78478 |
| <b>AHNAK</b>        | AHNAK nucleoprotein                                                                                                                                                                                                                                                                                                                                                                                                                                                                                                           | 4.47 | 3.00E-04 | 1.73  | 0.07986 |
| <b>MAFB</b>         | v-maf musculoaponeurotic fibrosarcoma oncogene homolog B (avian)                                                                                                                                                                                                                                                                                                                                                                                                                                                              | 4.50 | 3.00E-05 | 1.57  | 0.05957 |
| <b>UGT1A1</b>       | UDP glucuronosyltransferase 1 family, polypeptide A1 /// UDP glucuronosyltransferase 1 family, polypeptide A10 /// UDP glucuronosyltransferase 1 family, polypeptide A3 /// UDP glucuronosyltransferase 1 family, polypeptide A4 /// UDP glucuronosyltransferase 1 family, polypeptide A5 /// UDP glucuronosyltransferase 1 family, polypeptide A6 /// UDP glucuronosyltransferase 1 family, polypeptide A7 /// UDP glucuronosyltransferase 1 family, polypeptide A8 /// UDP glucuronosyltransferase 1 family, polypeptide A9 | 4.64 | 4.00E-05 | 1.35  | 0.21751 |
| <b>AK096324</b>     | ---                                                                                                                                                                                                                                                                                                                                                                                                                                                                                                                           | 5.05 | 0.00021  | 1.1   | 0.75854 |
| <b>MEGF6</b>        | multiple EGF-like-domains 6                                                                                                                                                                                                                                                                                                                                                                                                                                                                                                   | 5.18 | 0        | 1.17  | 0.26274 |
| <b>AHNAK2</b>       | AHNAK nucleoprotein 2                                                                                                                                                                                                                                                                                                                                                                                                                                                                                                         | 5.50 | 2.00E-04 | 1.66  | 0.1261  |
| <b>C18orf1</b>      | chromosome 18 open reading frame 1                                                                                                                                                                                                                                                                                                                                                                                                                                                                                            | 5.86 | 0.00027  | -1.04 | 0.90742 |
| <b>AXIN2</b>        | axin 2                                                                                                                                                                                                                                                                                                                                                                                                                                                                                                                        | 5.87 | 4.00E-05 | 1.21  | 0.4851  |
| <b>RYR3</b>         | ryanodine receptor 3                                                                                                                                                                                                                                                                                                                                                                                                                                                                                                          | 5.91 | 3.00E-05 | 1.15  | 0.59195 |
| <b>KRT15</b>        | keratin 15                                                                                                                                                                                                                                                                                                                                                                                                                                                                                                                    | 5.94 | 2.00E-05 | 1.44  | 0.15179 |
| <b>CYP1A1</b>       | cytochrome P450, family 1, subfamily A, polypeptide 1                                                                                                                                                                                                                                                                                                                                                                                                                                                                         | 5.96 | 0.00111  | -1.53 | 0.3133  |

|               |                                                          |      |          |       |         |
|---------------|----------------------------------------------------------|------|----------|-------|---------|
| <b>CYP2E1</b> | cytochrome P450, family 2, subfamily E,<br>polypeptide 1 | 6.35 | 4.00E-05 | 1.5   | 0.17043 |
| <b>WFDC5</b>  | WAP four-disulfide core domain 5                         | 6.72 | 0.00018  | -1.03 | 0.92517 |

---

**Table S3. A list of common differentially expressed genes affected by CRT1-MAML2- or CREB-depletion in human MEC H3118 cells.** This gene list represents candidate genes regulated by fusion/CREB interaction. The “positive” and “negative” signs denote up-regulated or down-regulated genes in KD compared to control groups, respectively. The asterisk indicates the common gene in different regulatory direction between fusion and CREB.

| Gene Symbol  | Gene Title                                                                               | Fusion<br>Fold Change | Fusion<br>p.value | CREB<br>Fold Change | CREB<br>p.value |
|--------------|------------------------------------------------------------------------------------------|-----------------------|-------------------|---------------------|-----------------|
| LINC00473    | chromosome 6 open reading frame 176                                                      | -37.12                | 0                 | -3.6                | 6.00E-05        |
| DMBT1        | deleted in malignant brain tumors 1                                                      | -35.73                | 0                 | -8.39               | 5.00E-05        |
| STC1         | stanniocalcin 1                                                                          | -21.74                | 0                 | -26.98              | 2.00E-05        |
| LOC100288985 | Hypothetical protein LOC100288985                                                        | -17.73                | 0                 | -41.04              | 8.00E-05        |
| NR4A3        | nuclear receptor subfamily 4, group A, member 3                                          | -16.29                | 1.00E-05          | -6.19               | 3.00E-05        |
| AW302848     | ---                                                                                      | -12.93                | 0.00013           | -2.25               | 0.00219         |
| OSBP2        | oxysterol binding protein 2                                                              | -9.52                 | 1.00E-05          | -2.94               | 0.00121         |
| SORBS2       | sorbin and SH3 domain containing 2                                                       | -8.42                 | 6.00E-04          | -4.23               | 0.00779         |
| LUM          | lumican                                                                                  | -6.98                 | 0.00061           | -4.16               | 0.03358         |
| HAL          | histidine ammonia-lyase                                                                  | -6.79                 | 2.00E-05          | -9.33               | 0               |
| SMOC1        | SPARC related modular calcium binding 1                                                  | -6.47                 | 0                 | -2.92               | 0.00125         |
| BC027448     | ---                                                                                      | -6.45                 | 0.00045           | -10.18              | 0               |
| BC020911     | ---                                                                                      | -6.44                 | 0.00377           | -3.41               | 0.00068         |
| NR4A1        | nuclear receptor subfamily 4, group A, member 1                                          | -6.14                 | 4.00E-05          | -2.08               | 7.00E-05        |
| NPR3         | natriuretic peptide receptor C/guanylate cyclase C (atrionatriuretic peptide receptor C) | -6                    | 0.00019           | -2.45               | 0.02913         |
| AA523939     | ---                                                                                      | -6                    | 1.00E-05          | -2.17               | 0.00911         |
| CREG2        | cellular repressor of E1A-stimulated genes 2                                             | -5.91                 | 2.00E-05          | 2.03                | 0.02738         |
| CHL1-AS2     | CHL1 antisense RNA 2                                                                     | -5.54                 | 0.00083           | -5.91               | 2.00E-05        |
| LGSN         | lengsin, lens protein with glutamine synthetase domain                                   | -5.27                 | 2.00E-05          | -3.65               | 0.02779         |
| MFS2A        | major facilitator superfamily domain containing 2A                                       | -4.96                 | 5.00E-05          | -10.08              | 0               |
| AI476341     | ---                                                                                      | -4.87                 | 0.00659           | -3.04               | 5.00E-05        |
| DUSP1        | dual specificity phosphatase 1                                                           | -4.81                 | 0.00017           | -2.15               | 0.03823         |
| A2M          | alpha-2-macroglobulin                                                                    | -4.62                 | 0.00102           | -2.26               | 0.01347         |
| AK022474     | ---                                                                                      | -4.51                 | 0.01964           | -3.25               | 0.00018         |
| CHL1         | Cell adhesion molecule with homology to L1CAM                                            | -4.47                 | 0.00163           | -2.92               | 0.03528         |
| ZNF331       | zinc finger protein 331                                                                  | -4.24                 | 8.00E-05          | -3.73               | 1.00E-05        |
| IL20         | interleukin 20                                                                           | -4.23                 | 0.00345           | -4.53               | 0.0017          |
| ENO3         | enolase 3 (beta, muscle)                                                                 | -4.14                 | 0.00033           | -3.19               | 8.00E-05        |
| AI806183     | ---                                                                                      | -4.1                  | 0.00016           | -3.55               | 0.00021         |
| EOMES        | eomesodermin                                                                             | -4.1                  | 1.00E-05          | -2.57               | 0.00381         |
| SRGN         | serglycin                                                                                | -3.95                 | 0.00518           | -3.18               | 3.00E-04        |
| DUSP4        | dual specificity phosphatase 4                                                           | -3.93                 | 0.00155           | -5.23               | 0               |
| NM_024853    | ---                                                                                      | -3.92                 | 0.00013           | -2.12               | 0.03494         |
| PTGS1        | prostaglandin-endoperoxide synthase 1 (prostaglandin G/H synthase and cyclooxygenase)    | -3.89                 | 0                 | -7.16               | 9.00E-05        |
| AV702787     | ---                                                                                      | -3.81                 | 0.00075           | -2.31               | 0.00058         |
| BG112263     | ---                                                                                      | -3.55                 | 3.00E-05          | -3.45               | 1.00E-04        |
| CALCA        | calcitonin-related polypeptide alpha                                                     | -3.49                 | 0.00643           | -2.85               | 0.0117          |
| SLCO4A1      | solute carrier organic anion transporter family, member 4A1                              | -3.46                 | 0                 | -7.92               | 6.00E-05        |
| CDH11        | cadherin 11, type 2, OB-cadherin (osteoblast)                                            | -3.38                 | 0.00044           | -10.27              | 0               |
| NCALD        | neurocalcin delta                                                                        | -3.34                 | 5.00E-05          | -2.33               | 0.00014         |
| LOC100506870 | hypothetical LOC100506870                                                                | -3.24                 | 0.00071           | -10.04              | 0.00016         |
| GRAMD1B      | GRAM domain containing 1B                                                                | -3.24                 | 0.00167           | -4.47               | 5.00E-05        |

|                     |                                                                                        |       |          |        |          |
|---------------------|----------------------------------------------------------------------------------------|-------|----------|--------|----------|
| <b>SLC2A14</b>      | solute carrier family 2 (facilitated glucose transporter), member 14                   | -3.2  | 0.00037  | -2.13  | 0.00724  |
| <b>LOC283713</b>    | hypothetical protein LOC283713                                                         | -3.19 | 0.01709  | 2.06   | 0.01445  |
| <b>FAM83A</b>       | family with sequence similarity 83, member A                                           | -3.18 | 0.00238  | -3.38  | 0.00279  |
| <b>AA416756</b>     | ---                                                                                    | -3.16 | 0.00578  | -2.44  | 0.00676  |
| <b>SFRP1</b>        | secreted frizzled-related protein 1                                                    | -3.12 | 0.00018  | -4.85  | 4.00E-05 |
| <b>F2RL2</b>        | coagulation factor II (thrombin) receptor-like 2                                       | -3.11 | 0.00039  | -5.63  | 0.00428  |
| <b>MGC39372</b>     | serpin peptidase inhibitor, clade B (ovalbumin), member 9 pseudogene                   | -3.09 | 0.00106  | -2.3   | 0.0039   |
| <b>TPRG1</b>        | tumor protein p63 regulated 1                                                          | -3.06 | 3.00E-05 | -4.22  | 0.00033  |
| <b>RASD1</b>        | RAS, dexamethasone-induced 1                                                           | -3.05 | 1.00E-04 | -4.96  | 2.00E-05 |
| <b>STEAP4</b>       | STEAP family member 4                                                                  | -3.03 | 0.00022  | -4.27  | 0.00091  |
| <b>E2F2</b>         | E2F transcription factor 2                                                             | -3.03 | 0.0024   | -2.51  | 0.04144  |
| <b>SERPINB9</b>     | serpin peptidase inhibitor, clade B (ovalbumin), member 9                              | -2.98 | 0.00472  | -6.82  | 0        |
| <b>SYT12</b>        | synaptotagmin XII                                                                      | -2.97 | 0.00015  | -4.85  | 1.00E-05 |
| <b>SMOX</b>         | spermine oxidase                                                                       | -2.95 | 0.01324  | -21.45 | 0        |
| <b>ATP6V0A4</b>     | ATPase, H <sup>+</sup> transporting, lysosomal V0 subunit a4                           | -2.9  | 0.00544  | -13.97 | 0        |
| <b>TNFRSF10B</b>    | tumor necrosis factor receptor superfamily, member 10b                                 | -2.89 | 0.00018  | -2.31  | 0.02723  |
| <b>XDH</b>          | xanthine dehydrogenase                                                                 | -2.87 | 0.02018  | -3     | 0.00331  |
| <b>BC037339</b>     | ---                                                                                    | -2.86 | 0.00021  | -2.27  | 0.01655  |
| <b>LOC338651</b>    | hypothetical LOC338651                                                                 | -2.82 | 0.04575  | 2.6    | 0.02727  |
| <b>PTGES</b>        | prostaglandin E synthase                                                               | -2.81 | 0.0132   | -2.33  | 0.00273  |
| <b>SEMA3B</b>       | sema domain, immunoglobulin domain (Ig), short basic domain, secreted, (semaphorin) 3B | -2.78 | 0.00031  | -2.3   | 0.00081  |
| <b>XPR1</b>         | xenotropic and polytropic retrovirus receptor 1                                        | -2.77 | 0.00322  | -4.14  | 0.00657  |
| <b>CA9</b>          | carbonic anhydrase IX                                                                  | -2.77 | 0.00402  | -3.29  | 0.03444  |
| <b>RAET1E</b>       | retinoic acid early transcript 1E                                                      | -2.72 | 0.02536  | -3.26  | 3.00E-05 |
| <b>SPRY1</b>        | sprouty homolog 1, antagonist of FGF signaling (Drosophila)                            | -2.7  | 0.01542  | -2.73  | 0.00472  |
| <b>ULBP2</b>        | UL16 binding protein 2                                                                 | -2.67 | 0.00021  | -2.79  | 0.00095  |
| <b>SLC2A3</b>       | solute carrier family 2 (facilitated glucose transporter), member 3                    | -2.65 | 0.00144  | -4.22  | 0.00034  |
| <b>KYNU</b>         | kynureninase (L-kynurenine hydrolase)                                                  | -2.63 | 0.00098  | -6.23  | 0        |
| <b>BF590850</b>     | ---                                                                                    | -2.6  | 4.00E-05 | -3.5   | 0.00171  |
| <b>GPR133</b>       | G protein-coupled receptor 133                                                         | -2.52 | 0.00279  | 3.55   | 0.00646  |
| <b>ANO3</b>         | anoctamin 3                                                                            | -2.5  | 0.00317  | -5.59  | 0        |
| <b>PIGH</b>         | phosphatidylinositol glycan anchor biosynthesis, class H                               | -2.5  | 0.00017  | -2.63  | 0.00153  |
| <b>NID2</b>         | nidogen 2 (osteonidogen)                                                               | -2.49 | 0.00011  | -3.68  | 0.00591  |
| <b>TGFB2</b>        | transforming growth factor, beta 2                                                     | -2.48 | 0.00244  | -4.76  | 0.00034  |
| <b>PSD3</b>         | pleckstrin and Sec7 domain containing 3                                                | -2.47 | 0.03327  | -2.05  | 0.0173   |
| <b>RASSF10</b>      | Ras association (RalGDS/AF-6) domain family (N-terminal) member 10                     | -2.45 | 0.00684  | -2.16  | 0.01003  |
| <b>LOC100128653</b> | hypothetical LOC100128653                                                              | -2.44 | 0.00019  | -2.09  | 0.00161  |
| <b>SSH1</b>         | slingshot homolog 1 (Drosophila)                                                       | -2.42 | 0.00079  | -3.47  | 0.00743  |
| <b>FEZ1</b>         | fasciculation and elongation protein zeta 1 (zygin I)                                  | -2.42 | 9.00E-05 | -3.39  | 0.00021  |
| <b>KLF9</b>         | Kruppel-like factor 9                                                                  | -2.4  | 0.00169  | -6.3   | 0.00242  |
| <b>CENPV</b>        | centromere protein V                                                                   | -2.4  | 0.00211  | -3.39  | 0.00011  |
| <b>RNF157-AS1</b>   | RNF157 antisense RNA 1                                                                 | -2.4  | 0.01288  | -2.21  | 0.03193  |
| <b>AI761207</b>     | ---                                                                                    | -2.39 | 0.00236  | -3.14  | 0.00697  |
| <b>BMP8B</b>        | bone morphogenetic protein 8b                                                          | -2.38 | 0.00438  | -2.79  | 7.00E-05 |
| <b>WDR76</b>        | WD repeat domain 76                                                                    | -2.35 | 0.00499  | -2.98  | 0.00247  |

|                     |                                                                |       |         |        |          |
|---------------------|----------------------------------------------------------------|-------|---------|--------|----------|
| <b>BE271180</b>     | ---                                                            | -2.34 | 0.00459 | -2.72  | 0.01322  |
| <b>CASP9</b>        | caspase 9, apoptosis-related cysteine peptidase                | -2.33 | 0.00016 | -2.17  | 4.00E-05 |
| <b>C11orf86</b>     | chromosome 11 open reading frame 86                            | -2.31 | 0.00125 | -4.34  | 0.00013  |
| <b>ZNF367</b>       | zinc finger protein 367                                        | -2.31 | 0.00111 | -2.37  | 0.03245  |
| <b>LOC728431</b>    | hypothetical LOC728431                                         | -2.3  | 0.00174 | -2.36  | 0.01613  |
| <b>SLC25A45</b>     | solute carrier family 25, member 45                            | -2.3  | 0.01443 | -2.07  | 0.01745  |
| <b>PER1</b>         | period homolog 1 (Drosophila)                                  | -2.28 | 0.00018 | -2.37  | 0.02402  |
| <b>IL24</b>         | interleukin 24                                                 | -2.27 | 0.04771 | -3.43  | 0.04046  |
| <b>AW611560</b>     | ---                                                            | -2.26 | 0.00519 | -2.13  | 0.00268  |
| <b>AI686793</b>     | ---                                                            | -2.25 | 0.00066 | -2.61  | 0.00132  |
| <b>AREG</b>         | amphiregulin                                                   | -2.23 | 0.04495 | -18.34 | 0        |
| <b>EDNRB</b>        | endothelin receptor type B                                     | -2.23 | 0.00037 | -2.86  | 0.02402  |
| <b>GYG2</b>         | glycogenin 2                                                   | -2.23 | 0.00261 | -2.6   | 0.00267  |
| <b>BF445387</b>     | ---                                                            | -2.23 | 0.0027  | -2.13  | 0.00411  |
| <b>KIAA1549</b>     | flavin containing monooxygenase 4                              | -2.22 | 0.00013 | -3     | 0        |
| <b>STAMBPL1</b>     | STAM binding protein-like 1                                    | -2.2  | 0.0049  | -2.82  | 4.00E-05 |
| <b>MCM10</b>        | minichromosome maintenance complex component 10                | -2.19 | 0.04848 | -3.59  | 8.00E-05 |
| <b>ZBTB38</b>       | zinc finger and BTB domain containing 38                       | -2.19 | 0.04405 | -2.28  | 0.00617  |
| <b>DNASE1L3</b>     | deoxyribonuclease I-like 3                                     | -2.18 | 0.00419 | -3.56  | 0.00101  |
| <b>ARID5B</b>       | AT rich interactive domain 5B (MRF1-like)                      | -2.18 | 0.00052 | 2.54   | 0.01386  |
| <b>PC</b>           | pyruvate carboxylase                                           | -2.17 | 0.00064 | -2.28  | 0.00514  |
| <b>FAM216A</b>      | family with sequence similarity 216, member A                  | -2.16 | 0.00016 | -5.08  | 0.00011  |
| <b>PRKCH</b>        | protein kinase C, eta                                          | -2.16 | 0.00061 | -3.73  | 0.00024  |
| <b>BRI3BP</b>       | BRI3 binding protein                                           | -2.15 | 0.0253  | -2.67  | 0.00234  |
| <b>AI300077</b>     | ---                                                            | -2.15 | 0.00412 | -2.54  | 4.00E-05 |
| <b>LOC100506021</b> | hypothetical LOC100506021                                      | -2.15 | 0.01054 | -2.25  | 0.00178  |
| <b>ITPR1</b>        | inositol 1,4,5-triphosphate receptor, type 1                   | -2.14 | 0.00162 | -2.45  | 0.00145  |
| <b>DLGAP1-AS1</b>   | DLGAP1 antisense RNA 1                                         | -2.14 | 0.04809 | -2.01  | 0.00014  |
| <b>DST</b>          | dystonin                                                       | -2.11 | 0.03694 | -2.13  | 0.01481  |
| <b>LOC158696</b>    | hypothetical LOC158696                                         | -2.11 | 0.00213 | 2.4    | 0.01369  |
| <b>TYMS</b>         | thymidylate synthetase                                         | -2.1  | 0.02143 | -2.46  | 0.00819  |
| <b>MSX2</b>         | msh homeobox 2                                                 | -2.1  | 0.01319 | 2.22   | 0.02264  |
| <b>MCTP2</b>        | multiple C2 domains, transmembrane 2                           | -2.09 | 0.00189 | -2.65  | 0.01823  |
| <b>FNDC3A</b>       | Fibronectin type III domain containing 3A                      | -2.09 | 0.04589 | -2.55  | 0.01236  |
| <b>AW293012</b>     | ---                                                            | -2.09 | 0.00093 | -2.41  | 0.00121  |
| <b>AA088388</b>     | ---                                                            | -2.08 | 0.04262 | -2.06  | 0.01107  |
| <b>CYFIP2</b>       | cytoplasmic FMR1 interacting protein 2                         | -2.07 | 0.0021  | 2.21   | 0.00134  |
| <b>AL049245</b>     | ---                                                            | -2.06 | 0.00369 | -5.75  | 0        |
| <b>SSFA2</b>        | sperm specific antigen 2                                       | -2.05 | 0.00073 | -2.05  | 0.03658  |
| <b>NCAM1</b>        | Neural cell adhesion molecule 1                                | -2.04 | 0.00845 | -3.48  | 0.00082  |
| <b>SMAD2</b>        | SMAD family member 2                                           | -2.04 | 0.00215 | -2.49  | 3.00E-05 |
| <b>RGCC</b>         | regulator of cell cycle                                        | -2.03 | 0.03419 | -3.21  | 0.02073  |
| <b>TMEM231</b>      | transmembrane protein 231                                      | -2.03 | 0.02144 | -2.76  | 0.00393  |
| <b>C11orf96</b>     | chromosome 11 open reading frame 96                            | -2.03 | 0.01409 | -2.36  | 0.00313  |
| <b>ATOH8</b>        | Atonal homolog 8 (Drosophila)                                  | -2.02 | 0.03864 | 2.87   | 0.00687  |
| <b>PRKAG2-AS1</b>   | PRKAG2 antisense RNA 1                                         | -2.01 | 0.01612 | -2.66  | 0.02381  |
| <b>TRAF3IP3</b>     | TRAF3 interacting protein 3                                    | -2.01 | 0.00273 | -2.31  | 0.00154  |
| <b>ERGIC1</b>       | endoplasmic reticulum-golgi intermediate compartment (ERGIC) 1 | -2.01 | 0.00621 | -2.27  | 0.04547  |
| <b>LINC00313</b>    | long intergenic non-protein coding RNA 313                     | -2    | 0.01814 | -2.69  | 0.00567  |
| <b>HOXA10</b>       | homeobox A10                                                   | 2.01  | 0.00161 | 2.04   | 0.00012  |
| <b>NREP</b>         | neuronal regeneration related protein homolog (rat)            | 2.01  | 0.04319 | 2.79   | 9.00E-05 |

|                     |                                                                                     |      |          |       |          |
|---------------------|-------------------------------------------------------------------------------------|------|----------|-------|----------|
| <b>PADI3</b>        | peptidyl arginine deiminase, type III                                               | 2.03 | 0.00887  | -2.73 | 2.00E-05 |
| <b>HS3ST1</b>       | heparan sulfate (glucosamine) 3-O-sulfotransferase 1                                | 2.03 | 0.02889  | -2.03 | 0.01363  |
| <b>PRKCA</b>        | protein kinase C, alpha                                                             | 2.04 | 0.00066  | -2.31 | 0.00127  |
| <b>GPR37</b>        | G protein-coupled receptor 37 (endothelin receptor type B-like)                     | 2.05 | 0.02429  | -2.05 | 0.00053  |
| <b>RASL11B</b>      | RAS-like, family 11, member B                                                       | 2.08 | 0.00127  | -3.16 | 0.00068  |
| <b>PI3</b>          | peptidase inhibitor 3, skin-derived                                                 | 2.08 | 0.03815  | -2.98 | 0.00364  |
| <b>IRAK2</b>        | interleukin-1 receptor-associated kinase 2                                          | 2.1  | 0.00105  | -2.22 | 0.00285  |
| <b>WFDC2</b>        | WAP four-disulfide core domain 2                                                    | 2.14 | 0.00652  | -2.78 | 0.00024  |
| <b>CYP1B1</b>       | cytochrome P450, family 1, subfamily B, polypeptide 1                               | 2.14 | 0.00679  | 2.49  | 0.00047  |
| <b>SERTAD4</b>      | SERTA domain containing 4                                                           | 2.17 | 0.00122  | -2.66 | 0.00373  |
| <b>ETS1</b>         | v-ets erythroblastosis virus E26 oncogene homolog 1 (avian)                         | 2.17 | 0.00029  | -2.09 | 0.0024   |
| <b>WNT10A</b>       | Wingless-type MMTV integration site family, member 10A                              | 2.17 | 0.00265  | 3.38  | 0.00059  |
| <b>LOC728978</b>    | uncharacterized LOC728978                                                           | 2.18 | 0.00056  | 2.18  | 0.02444  |
| <b>MARCKS</b>       | myristoylated alanine-rich protein kinase C substrate                               | 2.18 | 0.00228  | 2.52  | 0.0027   |
| <b>LOC100292680</b> | hypothetical LOC100292680                                                           | 2.19 | 0.00376  | 3.76  | 0.0032   |
| <b>SERPINA1</b>     | serpin peptidase inhibitor, clade A (alpha-1 antiproteinase, antitrypsin), member 1 | 2.27 | 0.00614  | -4.65 | 0.00044  |
| <b>A1936724</b>     | ---                                                                                 | 2.27 | 0.00302  | -2.9  | 0.00923  |
| <b>CYP1A1</b>       | cytochrome P450, family 1, subfamily A, polypeptide 1                               | 2.29 | 0.0261   | 5.96  | 0.00111  |
| <b>RUNX1</b>        | runt-related transcription factor 1                                                 | 2.3  | 0.00957  | -3.32 | 0.00111  |
| <b>AW189097</b>     | ---                                                                                 | 2.3  | 0.01593  | 2.46  | 0.03749  |
| <b>MAF</b>          | v-maf musculoaponeurotic fibrosarcoma oncogene homolog (avian)                      | 2.31 | 0.01038  | 2.84  | 0.00295  |
| <b>A1223854</b>     | ---                                                                                 | 2.34 | 0.00425  | 2.15  | 0.00628  |
| <b>IFITM10</b>      | interferon induced transmembrane protein 10                                         | 2.38 | 0.04561  | 2.31  | 0.02374  |
| <b>UPP1</b>         | uridine phosphorylase 1                                                             | 2.39 | 0.02813  | -2.75 | 0.0041   |
| <b>COL5A1</b>       | collagen, type V, alpha 1                                                           | 2.41 | 0.00067  | 2.09  | 0.00254  |
| <b>CD44</b>         | CD44 molecule (Indian blood group)                                                  | 2.62 | 0.00099  | -2.4  | 0.00231  |
| <b>CORO2B</b>       | coronin, actin binding protein, 2B                                                  | 2.72 | 0.0018   | -2.76 | 0.00062  |
| <b>LRRN1</b>        | leucine rich repeat neuronal 1                                                      | 2.79 | 8.00E-05 | -2.82 | 0.03339  |
| <b>KRT6B</b>        | keratin 6B                                                                          | 2.84 | 0.00038  | -2.22 | 0.0132   |
| <b>FAM49A</b>       | family with sequence similarity 49, member A                                        | 2.84 | 9.00E-05 | -2.04 | 0.00519  |
| <b>DUSP5P</b>       | dual specificity phosphatase 5 pseudogene                                           | 2.89 | 5.00E-04 | 2.35  | 0.00587  |
| <b>ALDH1A3</b>      | aldehyde dehydrogenase 1 family, member A3                                          | 2.92 | 0.00026  | -4.04 | 0.00105  |
| <b>TUBA1A</b>       | tubulin, alpha 1a                                                                   | 2.94 | 0.00044  | -2.31 | 0.04361  |
| <b>THBD</b>         | thrombomodulin                                                                      | 2.96 | 0.00033  | -3.29 | 0.00486  |
| <b>RASSF6</b>       | Ras association (RalGDS/AF-6) domain family member 6                                | 3.01 | 0.00019  | 2.17  | 0.02682  |
| <b>KRT16</b>        | keratin 16                                                                          | 3.04 | 0.00032  | 2.92  | 0.00046  |
| <b>UGT1A1</b>       | UDP glucuronosyltransferase 1 family, polypeptide A1                                | 3.06 | 0.00336  | 4.64  | 4.00E-05 |
| <b>MYLK</b>         | myosin light chain kinase                                                           | 3.09 | 0.00691  | 2.58  | 0.00098  |
| <b>TAGLN</b>        | transgelin                                                                          | 3.1  | 0.04019  | 2.34  | 0.03019  |
| <b>MAFB</b>         | v-maf musculoaponeurotic fibrosarcoma oncogene homolog B (avian)                    | 3.2  | 0.01557  | 4.5   | 3.00E-05 |
| <b>TNFSF10</b>      | tumor necrosis factor (ligand) superfamily, member 10                               | 3.34 | 0.00567  | -2.84 | 0.00748  |

|                 |                                                                                               |       |          |       |          |
|-----------------|-----------------------------------------------------------------------------------------------|-------|----------|-------|----------|
| <b>PLAU</b>     | plasminogen activator, urokinase                                                              | 3.55  | 0.00081  | -6.56 | 0        |
| <b>AHNAK2</b>   | AHNAK nucleoprotein 2                                                                         | 3.58  | 0.00281  | 5.5   | 2.00E-04 |
| <b>SLC47A2</b>  | solute carrier family 47, member 2                                                            | 3.61  | 0.00311  | 3.86  | 2.00E-05 |
| <b>ERC1</b>     | ELKS/RAB6-interacting/CAST family member 1                                                    | 4.15  | 9.00E-05 | 2.5   | 0.00103  |
| <b>MMP28</b>    | matrix metalloproteinase 28                                                                   | 4.23  | 0.00033  | -2.46 | 0.02048  |
| <b>EPHA4</b>    | EPH receptor A4                                                                               | 4.3   | 0.00042  | 2.53  | 0.02907  |
| <b>FABP4</b>    | fatty acid binding protein 4, adipocyte                                                       | 4.45  | 0.01837  | -2.57 | 0.02591  |
| <b>C18orf1</b>  | chromosome 18 open reading frame 1                                                            | 4.58  | 0.0013   | 5.86  | 0.00027  |
| <b>GPR39</b>    | G protein-coupled receptor 39                                                                 | 4.64  | 0.00029  | 2.04  | 0.01846  |
| <b>MTSS1</b>    | metastasis suppressor 1                                                                       | 4.83  | 0.00047  | -2.12 | 0.02179  |
| <b>FBXO32</b>   | F-box protein 32                                                                              | 5.68  | 0.00022  | 2.44  | 0.02761  |
| <b>SERPINA3</b> | serpin peptidase inhibitor, clade A (alpha-1 antiproteinase, antitrypsin), member 3           | 5.78  | 0.00155  | -4.85 | 8.00E-04 |
| <b>KRT15</b>    | keratin 15                                                                                    | 6.65  | 0.00113  | 5.94  | 2.00E-05 |
| <b>MMP1</b>     | matrix metalloproteinase 1 (interstitial collagenase)                                         | 11.48 | 7.00E-05 | -2.13 | 0.00423  |
| <b>SERPINE1</b> | serpin peptidase inhibitor, clade E (nexin, plasminogen activator inhibitor type 1), member 1 | 15.77 | 0        | -2.95 | 0.03059  |
| <b>GPNMB</b>    | glycoprotein (transmembrane) nmb                                                              | 16    | 2.00E-05 | 3.47  | 0.01109  |
